# Supplementary material for: Copper-catalyzed selective C–N bond formation with 2-amino, 2-hydroxy and 2-bromo-5-halopyridine
Source: Royal Society of Chemistry journal article supplement (doi:10.1039/c7ra08482j), 2017-01-01
Supplement: c7ra08482j1.pdf [file c7ra08482j1.pdf]

## Copper-Catalyzed selective C-N Bond Formation with Unprotected 2-Amino, 2-Hydroxy and 2-Bromo-5-halopyridine

Swarnali Roy,<sup>[a,b]</sup> Barnali Paul,<sup>[a,b]</sup> Ayan Mukherjee,<sup>[a]</sup> Biswajit Kundu,<sup>[a]</sup> Arindam Talukdar,<sup>\*[a]</sup>

[a] Department of Organic and Medicinal Chemistry, CSIR-Indian Institute of Chemical Biology, 4 Raja S. C. Mullick Road, Kolkata 700032, WB (India)

[b] Swarnali Roy and Barnali Paul contributed equally.

E mail: [atalukdar@iicb.res.in](mailto:atalukdar@iicb.res.in)

### Table of Contents

|                                                  |     |
|--------------------------------------------------|-----|
| Table of Contents                                | S1  |
| Material and Methods                             | S2  |
| <sup>1</sup> H and <sup>13</sup> C Spectral Data | S10 |

**General Methods (Compound 1-22).** 2-Amino-5-iodo pyridine/2-Hydroxy-5-iodo pyridine (0.5 mmol), CuI (10 mol%), K<sub>3</sub>PO<sub>4</sub> (3.0 equiv) was taken in a sealed tube. After purging it with nitrogen, dry isopropanol was added to it followed by addition of amine and ethylene glycol (10 mol%). The reaction mixture was again flashed with nitrogen and then the tube was finally sealed under nitrogen atmosphere. The reaction mixture was heated to 110 °C for 10-12 hours. Formation of product was confirmed after checking the TLC. Then the reaction mixture was passed through celite bed using methanol. Product was purified by Flash chromatography using Methanol/CHCl<sub>3</sub> system.

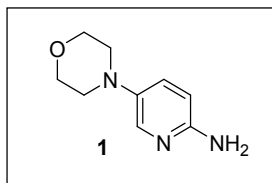

*5-Morpholinopyridin-2-amine, 1.* Brown gummy solid, yield 87%. <sup>1</sup>H NMR (600 MHz, CD<sub>3</sub>OD) δ 7.59 (br s, 1H), 7.32 (dd, *J* = 9.0 Hz, 3.0 Hz, 1H), 6.59 (d, *J* = 9.0 Hz, 1H), 3.81 (t, *J* = 4.8 Hz, 4H), 2.98 (t, *J* = 4.8 Hz, 4H); <sup>13</sup>C NMR (150 MHz, CD<sub>3</sub>OD) δ 155.9, 136.0, 131.4, 111.3, 68.1, 52.4. HRMS (ESI): *m/z* calcd for C<sub>9</sub>H<sub>14</sub>N<sub>3</sub>O [M+H]<sup>+</sup> 180.1138; found 180.1148.

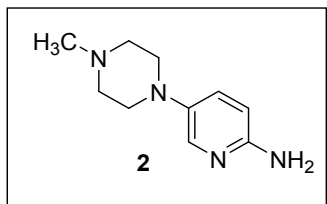

*5-(4-Methylpiperazin-1-yl)pyridine-2-amine, 2.* Brown gummy solid, yield 92%. <sup>1</sup>H NMR (300 MHz, CDCl<sub>3</sub>) δ 7.78 (d, *J* = 3.0 Hz, 1H), 7.17 (dd, *J* = 8.7 Hz, 2.7 Hz, 1H), 6.48 (d, *J* = 8.7 Hz, 1H), 3.05 (t, *J* = 5.1 Hz, 4H), 2.58 (t, *J* = 4.8 Hz, 4H), 2.34 (s, 3H); <sup>13</sup>C NMR (150 MHz, CDCl<sub>3</sub>) δ 153.1, 140.7, 137.0, 129.0, 109.3, 55.2, 50.8, 46.2. HRMS (ESI): *m/z* calcd for C<sub>10</sub>H<sub>17</sub>O<sub>4</sub> [M+H]<sup>+</sup> 193.1454; found 193.1458.

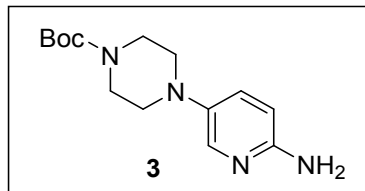

*t-Butyl 4-(6-Aminopyridin-3-yl)piperazine-1-carboxylate, 3.* Brown gummy solid, yield 85%. <sup>1</sup>H NMR (300 MHz, CDCl<sub>3</sub>) δ 7.76 (br s, 1H), 7.16 (dd, *J* = 8.7 Hz, 2.7 Hz, 1H), 6.48 (d, *J* = 8.7 Hz, 1H), 3.56 (t, *J* = 5.1 Hz, 4H), 2.94 (t, *J* = 5.1 Hz, 4H), 1.47 (s, 9H); <sup>13</sup>C NMR (150 MHz, CDCl<sub>3</sub>) δ 154.8, 153.3, 140.6, 136.3, 130.4, 109.8, 80.1, 51.0, 28.5. HRMS (ESI): *m/z* calcd for C<sub>14</sub>H<sub>23</sub>N<sub>4</sub>O<sub>2</sub> [M+H]<sup>+</sup> 279.1822; found 279.1821.

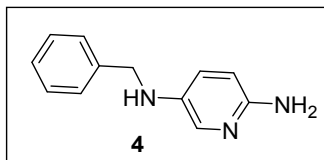

*N5-Benzylpyridine-2,5-diamine*, **4**. Brown gummy solid, yield 72%.  $^1\text{H}$  NMR (300 MHz,  $\text{CDCl}_3$ )  $\delta$  7.57 (d,  $J = 3.0$  Hz, 1H), 7.35-7.26 (m, 5H), 6.91 (dd,  $J = 8.7$  Hz, 2.7 Hz, 1H), 6.44 (d,  $J = 8.7$  Hz, 1H), 4.26 (s, 2H);  $^{13}\text{C}$  NMR ( $\text{CDCl}_3$ , 75 MHz)  $\delta$  151.3, 139.3, 137.6, 132.2, 128.8, 127.7, 127.5, 125.5, 110.0, 49.5; HRMS (EI):  $m/z$  calcd for  $\text{C}_{12}\text{H}_{13}\text{N}_3$   $[\text{M}]^+$  199.1109; found 199.1095.

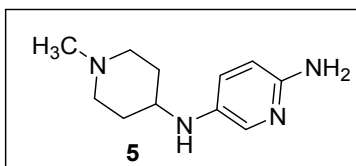

*N5-(1-methylpiperidin-4-yl)pyridine-2,5-diamine* **5**. Yield 86%.  $^1\text{H}$  NMR (300 MHz,  $\text{CDCl}_3$ )  $\delta$  7.56 (d,  $J = 2.7$  Hz, 1H), 6.88 (dd,  $J = 8.4$  Hz, 2.7 Hz, 1H), 6.43 (d,  $J = 8.7$  Hz, 1H), 4.04 (br s, -NH), 3.15-3.08 (m, 1H), 2.79 (m, 2H), 2.28 (s, 3H), 2.11-1.98 (m, 4H), 1.49-1.37 (m, 2H);  $^{13}\text{C}$  NMR (75 MHz,  $\text{CDCl}_3$ )  $\delta$  151.5, 136.3, 134.5, 126.2, 109.7, 54.6, 51.2, 46.3, 32.8; HRMS (EI):  $m/z$  calcd for  $\text{C}_{11}\text{H}_{18}\text{N}_4$   $[\text{M}]^+$  206.1531; found 206.1524.

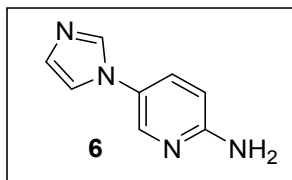

*5-(1H-Imidazol-1-yl)pyridin-2-amine* **6**. Brown gummy solid, yield 85%.  $^1\text{H}$  NMR (600 MHz,  $\text{CD}_3\text{OD}$ )  $\delta$  8.07 (d,  $J = 2.4$  Hz, 1H), 7.94 (s, 1H), 7.61 (dd,  $J = 8.4$  Hz, 2.4 Hz, 1H), 7.39 (s, 1H), 7.11 (s, 1H), 6.67 (d,  $J = 9.0$  Hz, 1H);  $^{13}\text{C}$  NMR (150 MHz,  $\text{CD}_3\text{OD}$ )  $\delta$  160.7, 141.9, 137.3, 133.9, 129.8, 126.0, 120.6, 110.4. HRMS (ESI):  $m/z$  calcd for  $\text{C}_8\text{H}_9\text{N}_4$   $[\text{M}+\text{H}]^+$  161.0828; found 161.0832.

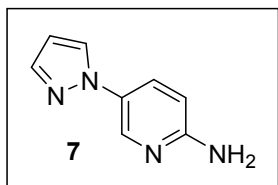

*5-(1H-pyrazol-1-yl)pyridin-2-amine* **7**. Off white solid, yield 82%.  $^1\text{H}$  NMR (300 MHz,  $\text{CD}_3\text{OD}$ )  $\delta$  8.19 (d,  $J = 2.1$  Hz, 1H), 8.00 (d,  $J = 2.4$  Hz, 1H), 7.74 (dd,  $J = 9.0$  Hz, 2.7 Hz, 1H), 7.66 (d,  $J = 1.5$  Hz, 1H),

6.65 (d,  $J = 9.0$  Hz, 1H), 6.47 (t,  $J = 2.4$  Hz, 1H);  $^{13}\text{C}$  NMR (75 MHz,  $\text{CD}_3\text{OD}$ )  $\delta$  159.9, 141.7, 140.2, 132.3, 129.3, 110.2, 108.2. HRMS (ESI):  $m/z$  calcd for  $\text{C}_8\text{H}_8\text{N}_4$   $[\text{M}+\text{Na}]^+$  183.0647; found 183.0643.

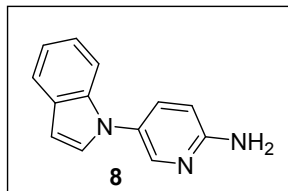

*5-(1H-Indol-1-yl)pyridin-2-amine* **8**. Yellow gummy solid, yield 88%.  $^1\text{H}$  NMR (300 MHz,  $\text{CDCl}_3$ )  $\delta$  7.71 (d,  $J = 7.2$  Hz, 1H), 7.59 (d,  $J = 8.7$  Hz, 1H), 7.38 (d,  $J = 7.8$  Hz, 1H), 7.28 (s, 1H), 7.24-7.16 (m, 4H), 6.69 (d,  $J = 3.0$  Hz, 2H);  $^{13}\text{C}$  NMR (75 MHz,  $\text{CDCl}_3$ )  $\delta$  157.2, 136.8, 135.4, 129.0, 128.3, 122.5, 121.2, 120.4, 110.2, 103.4; HRMS (EI):  $m/z$  calcd for  $\text{C}_{13}\text{H}_{11}\text{N}_3$   $[\text{M}]^+$  209.0953; found 209.0950.

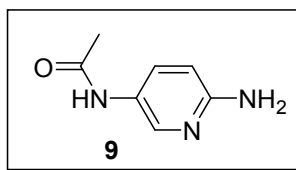

*N-(6-Aminopyridin-3-yl)acetamide* **9**. Brown gummy solid, yield 76%.  $^1\text{H}$  NMR (300 MHz,  $\text{CDCl}_3$  + 1 drop  $\text{CD}_3\text{OD}$ )  $\delta$  7.85 (d,  $J = 2.1$  Hz, 1H), 7.69 (dd,  $J = 9.0$  Hz, 2.4 Hz, 1H), 6.43 (d,  $J = 8.7$  Hz, 1H), 2.01 (s, 3H);  $^{13}\text{C}$  NMR (150 MHz,  $\text{CD}_3\text{OD}$ )  $\delta$  171.7, 157.9, 140.4, 133.5, 127.1, 110.0, 23.3. HRMS (ESI):  $m/z$  calcd for  $\text{C}_7\text{H}_9\text{N}_3\text{O}$   $[\text{M}+\text{Na}]^+$  174.0644; found 174.0645.

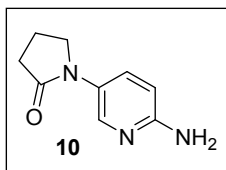

*1-(6-Aminopyridin-3-yl)pyrrolidin-2-one* **10**. Brown gummy solid, yield 80%.  $^1\text{H}$  NMR (300 MHz,  $\text{CDCl}_3$ )  $\delta$  8.06 (br s, 1H), 7.88 (dd,  $J = 11.1$  Hz, 2.4 Hz, 1H), 6.51 (d,  $J = 8.4$  Hz, 1H), 3.78 (t,  $J = 6.9$  Hz, 2H), 2.55 (t,  $J = 7.8$  Hz, 2H), 2.19-2.09 (m, 2H);  $^{13}\text{C}$  NMR (75 MHz,  $\text{CDCl}_3$ ) 174.9, 156.2, 139.9, 132.3, 109.3, 64.2, 49.4, 32.5, 18.6. HRMS (EI):  $m/z$  calcd for  $\text{C}_9\text{H}_{11}\text{N}_3\text{O}$   $[\text{M}]^+$  177.0902; found 177.0891.

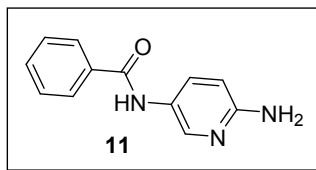

*N-(6-Aminopyridin-3-yl)benzamide* **11**. Yield 70%.  $^1\text{H}$  NMR (300 MHz,  $\text{CDCl}_3$  + 1 drop  $\text{CD}_3\text{OD}$ )  $\delta$  8.01 (br s, 1H), 7.86-7.80 (m, 3H), 7.48-7.36 (m, 3H), 7.62-7.49 (m, 3H), 6.52 (d,  $J = 9.0$  Hz, 1H);  $^{13}\text{C}$

NMR (75 MHz, CD<sub>3</sub>OD) 168.9, 158.2, 141.7, 135.8, 134.5, 132.9, 129.6, 128.5, 127.0, 109.9. HRMS (EI): m/z calcd for C<sub>12</sub>H<sub>11</sub>N<sub>3</sub>O [M]<sup>+</sup> 213.0902; found 213.0888.

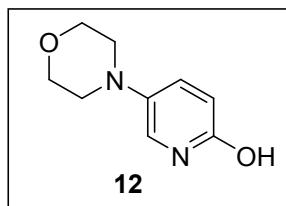

*5-Morpholinopyridin-2-ol 12*. Brown solid. M.p- 218 °C. Yield 82%. <sup>1</sup>H NMR (600 MHz, CDCl<sub>3</sub>) δ 7.38 (dd, *J* = 9.6 Hz, 3.0 Hz, 1H), 6.85 (d, *J* = 3.0 Hz, 1H), 6.57 (d, *J* = 9.9 Hz, 1H), 3.81 (t, *J* = 4.5 Hz, 4H), 2.87 (t, *J* = 4.8 Hz, 4H); <sup>13</sup>C NMR (150 MHz, CDCl<sub>3</sub>) δ 163.1, 137.6, 135.2, 120.7, 120.3, 66.8, 51.1; HRMS (EI): m/z calcd for C<sub>9</sub>H<sub>12</sub>N<sub>2</sub>O<sub>2</sub> [M]<sup>+</sup> 180.0899; found 180.0897.

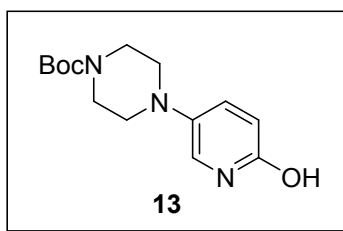

*tert-Butyl 4-(6-hydroxypyridin-3-yl)piperazine-1-carboxylate 13*. Green gummy solid. Yield 80%. δ <sup>1</sup>H NMR (600 MHz, CDCl<sub>3</sub>) δ 7.39 (dd, *J* = 9.6 Hz, 3.0 Hz, 1H), 7.36 (dd, *J* = 6.6 Hz, 1.8 Hz, 1H), 6.84 (d, *J* = 3.0 Hz, 1H), 3.55 (t, *J* = 4.8 Hz, 4H), 2.82 (t, *J* = 4.8 Hz, 4H), 1.48 (s, 9H); <sup>13</sup>C NMR (150 MHz, CDCl<sub>3</sub>) δ 154.5, 141.7, 138.2, 134.4, 120.6, 106.9, 80.0, 50.8, 28.3; HRMS (EI): m/z calcd for C<sub>14</sub>H<sub>21</sub>N<sub>3</sub>O<sub>3</sub> [M]<sup>+</sup> 279.1583; found 279.1583.

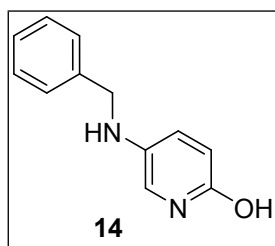

*5-(Benzylamino)pyridin-2-ol 14*. Brown gummy solid. Yield 72%. <sup>1</sup>H NMR (600 MHz, CDCl<sub>3</sub> + 1 drop CD<sub>3</sub>OD) δ 7.25-7.23 (m, 3H), 7.19-7.17 (m, 2H), 7.13 (dd, *J* = 6.6 Hz, 3.0 Hz, 1H), 6.43-6.41 (m, 2H), 4.04 (s, 2H). <sup>13</sup>C NMR (150 MHz, CDCl<sub>3</sub> + 1 drop CD<sub>3</sub>OD) δ 160.8, 138.0, 135.9, 132.1, 128.4, 127.24, 127.21, 120.1, 113.3, 29.4. HRMS (EI): m/z calcd for C<sub>12</sub>H<sub>12</sub>N<sub>2</sub>O [M]<sup>+</sup> 200.0950; found 200.0946.

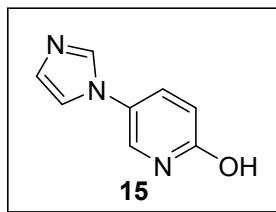

*5-(1H-Imidazol-1-yl)pyridin-2-ol 15*. White solid. M.p- 195 °C Yield 91%. <sup>1</sup>H NMR (600 MHz, CDCl<sub>3</sub> + 1 drop CD<sub>3</sub>OD) δ 7.64 (s, 1H), 7.51-7.48 (m, 2H), 7.07 (d, *J* = 5.4 Hz, 2H), 6.61 (d, *J* = 10.0 Hz, 1H). <sup>13</sup>C NMR (150 MHz, CDCl<sub>3</sub> + 1 drop CD<sub>3</sub>OD) δ 163.1, 137.7, 135.9, 129.6, 128.9, 121.1, 119.7, 119.0. HRMS (EI): *m/z* calcd for C<sub>8</sub>H<sub>7</sub>N<sub>3</sub>O [M]<sup>+</sup> 161.0589; found 161.0554.

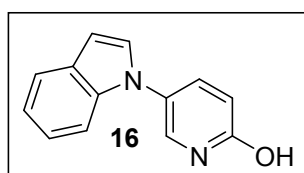

*5-(1H-indol-1-yl)pyridine-2-ol 16*. Grey solid. M.p- 180 °C (decomposed). <sup>1</sup>H NMR (300 MHz, CDCl<sub>3</sub>) δ 7.78 (s, 1H), 7.69 (d, *J* = 8.7 Hz, 2H), 7.34 (d, *J* = 7.5 Hz, 2H), 7.22-7.17 (m, 3H), 6.68 (d, *J* = 2.1 Hz, 1H). <sup>13</sup>C NMR (150 MHz, CDCl<sub>3</sub>) δ 136.7, 128.9, 128.0, 122.9, 121.4, 120.8, 109.9, 104.0. HRMS (EI) Calcd for C<sub>13</sub>H<sub>10</sub>N<sub>2</sub>O [M]<sup>+</sup> 210.0793, found 210.0789.

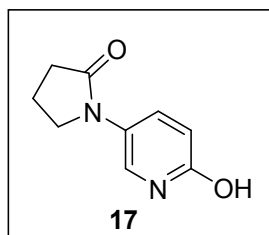

*1-(6-Hydroxypyridin-3-yl)pyrrolidin-2-one 17*. Green solid. M.p- 180 °C. Yield 84%. <sup>1</sup>H NMR (600 MHz, CDCl<sub>3</sub>) δ 7.83 (dd, *J* = 7.2, 2.4 Hz, 1H), 7.66 (d, *J* = 3.0 Hz, 1H), 6.57 (d, *J* = 9.6 Hz, 1H), 3.70-3.67 (m, 2H), 2.53 (t, *J* = 7.8 Hz, 2H), 2.14 (t, *J* = 7.8 Hz, 2H). <sup>13</sup>C NMR (150 MHz, CDCl<sub>3</sub>) δ 174.5, 136.8, 126.7, 122.3, 120.0, 63.8, 48.6, 31.8, 17.9. HRMS (EI): *m/z* calcd for C<sub>9</sub>H<sub>10</sub>N<sub>2</sub>O<sub>2</sub> [M]<sup>+</sup> 178.0742; found 178.0734.

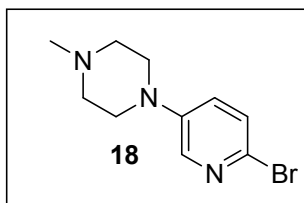

*1-(6-bromopyridin-3-yl)-4-methylpiperazine 18*. Yellow gummy solid.  $^1\text{H}$  NMR (300 MHz,  $\text{CDCl}_3$ )  $\delta$  7.99 (d,  $J = 3.3$  Hz, 1H), 7.28 (d,  $J = 8.7$  Hz, 1H), 7.06 (dd,  $J = 8.7$  Hz, 5.7 Hz, 1H), 3.20 (t,  $J = 4.8$  Hz, 2H), 2.56 (t,  $J = 5.1$  Hz, 2H), 2.34 (s, 3H).  $^{13}\text{C}$  NMR (75 MHz,  $\text{CDCl}_3$ )  $\delta$  145.5, 137.1, 129.8, 126.7, 124.6, 53.7, 47.2, 45.2. HRMS (ESI) Calcd for  $\text{C}_{10}\text{H}_{15}\text{BrN}_3$   $[\text{M}+\text{H}]^+$  258.0430; found 258.0427.

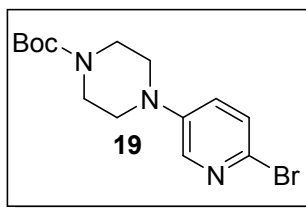

*Tert-butyl 4-(6-bromopyridin-3-yl)piperazine-1-carboxylate 19*. Light yellow solid. Mp- 140°C.  $^1\text{H}$  NMR (300 MHz,  $\text{CDCl}_3$ )  $\delta$  8.02 (d,  $J = 2.7$  Hz, 1H), 7.33 (d,  $J = 8.7$  Hz, 1H), 7.09 (dd,  $J = 8.7$  Hz, 3.3 Hz, 1H), 3.59 (t,  $J = 5.1$  Hz, 4H), 3.14 (t,  $J = 5.4$  Hz, 4H), 1.48 (s, 9H);  $^{13}\text{C}$  NMR (75 MHz,  $\text{CDCl}_3$ )  $\delta$  154.6, 146.6, 138.5, 131.4, 127.8, 126.2, 80.3, 48.6, 28.5. HRMS (EI):  $m/z$  calcd for  $\text{C}_{14}\text{H}_{20}\text{BrN}_3\text{O}_2$   $[\text{M}]^+$  341.0739; found 341.0746.

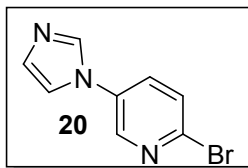

*2-bromo-5-(1H-imidazol-1-yl)pyridine 20*. Yellow fluffy solid. Mp- 130°C.  $^1\text{H}$  NMR (300 MHz,  $\text{CDCl}_3$ )  $\delta$  8.52 (s, 1H), 7.92 (s, 1H), 7.66-7.59 (m, 2H), 7.29 (s, 2H);  $^{13}\text{C}$  NMR (75 MHz,  $\text{CDCl}_3$ )  $\delta$  142.9, 140.4, 135.6, 133.5, 131.6, 131.5, 129.1, 118.1. HRMS (ESI) Calcd for  $\text{C}_8\text{H}_7\text{BrN}_3$   $[\text{M}+\text{H}]^+$  223.9824, found 223.9824.

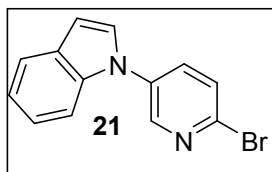

*1-(6-bromopyridin-3-yl)-1H-indole 21*. Yellow gummy solid.  $^1\text{H}$  NMR (600 MHz,  $\text{CDCl}_3$ )  $\delta$  7.90 (s, 1H), 7.47 (d,  $J = 7.8$  Hz, 1H), 7.31 (d,  $J = 7.8$  Hz, 1H), 7.13 (t,  $J = 7.8$  Hz, 1H), 6.98-6.95 (m, 4H), 6.64-6.55

(m, 1H);  $^{13}\text{C}$  NMR (150 MHz,  $\text{CDCl}_3$ )  $\delta$  144.7, 136.7, 130.5, 126.9, 126.1, 121.9, 119.8, 119.7, 119.3, 118.9, 115.9, 111.2. HRMS (EI) Calcd for  $\text{C}_{13}\text{H}_9\text{BrN}_2$   $[\text{M}]^+$  271.9955, found 271.9951.

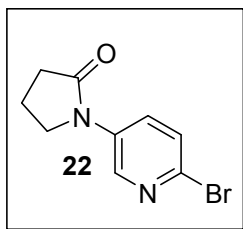

*1-(6-bromopyridin-3-yl)pyrrolidin-2-one* **22**. Yellow solid. Mp- 85°C.  $^1\text{H}$  NMR (300 MHz,  $\text{CDCl}_3$ )  $\delta$  8.41 (d,  $J = 2.7$  Hz, 1H), 8.14 (dd,  $J = 8.7$  Hz, 2.7 Hz, 1H), 7.41 (d,  $J = 8.7$  Hz, 1H), 3.82 (t,  $J = 6.9$  Hz, 2H), 2.58 (t,  $J = 8.1$  Hz, 2H), 2.23-2.13 (m, 2H).  $^{13}\text{C}$  NMR (150 MHz,  $\text{CDCl}_3$ )  $\delta$  174.9, 140.2, 136.1, 135.8, 129.6, 127.9, 47.9, 32.3, 18.0. HRMS (ESI) Calcd for  $\text{C}_9\text{H}_{10}\text{BrN}_2\text{O}$   $[\text{M}+\text{H}]^+$  242.9957, found 242.9967.

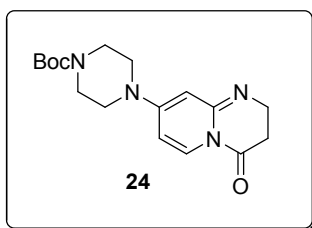

*t-Butyl 4-(4-oxo-3,4-dihydro-2H-pyrido[1,2-a]pyrimidin-7-yl)piperazine-1-carboxylate* **24**. *t*-Butyl 4-(6-aminopyridin-3-yl)piperazine-1-carboxylate (1 mmol) was mixed with methyl acrylate (1.5 mmol) in hexafluoroisopropanol (1 mL) in a sealed tube and the mixture was heated to 70 °C for 12 h. Formation of product was confirmed after checking the TLC. After completion of the reaction, solvents were evaporated and residue was purified by flash chromatography using  $\text{CHCl}_3/\text{MeOH}/\text{NH}_3$  system to provided purified compound **24** as brown gummy solid. Yield 87%.  $^1\text{H}$  NMR (300 MHz,  $\text{CDCl}_3$ )  $\delta$  7.45 (dd,  $J = 6.9, 2.7$  Hz, 1H), 7.07 (d,  $J = 4.8$  Hz, 1H), 6.98 (d,  $J = 2.7$  Hz, 1H), 4.37-4.29 (m, 2H), 3.57 (t,  $J = 5.1$  Hz, 4H), 2.98 (t,  $J = 5.1$  Hz, 4H), 2.76-2.71 (m, 2H), 1.47 (s, 9H);  $^{13}\text{C}$  NMR (75 MHz,  $\text{CDCl}_3$ ) 162.5, 154.4, 140.5, 134.8, 134.6, 123.9, 122.1, 80.3, 72.8, 51.1, 49.1, 29.6, 28.3, 21.7. HRMS (EI):  $m/z$  calcd for  $\text{C}_{17}\text{H}_{24}\text{N}_4\text{O}_3$   $[\text{M}]^+$  332.1848; found 332.1854.



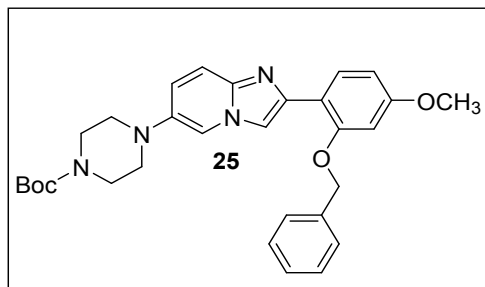

*t*-Butyl 4-(2-(2-(benzyloxy)-4-methoxyphenyl)imidazo[1,2-*a*]pyridin-6-yl)piperazine-1-carboxylate **25**. 1-(2-(Benzyloxy)-4-methoxyphenyl)-2-bromoethanone (0.54 mmol, **23**), **4** (0.36 mmol) and NaHCO<sub>3</sub> (1.08 mmol) were taken in a round bottom flask and refluxed in dry acetone for 4 hours. Formation of product was confirmed after checking the TLC. After completion of the reaction, acetone was evaporated and the organic part was extracted using ethyl acetate. Flash chromatography using Methanol/CHCl<sub>3</sub> system provided purified compound **25** as brown gummy solid. Yield 83%. <sup>1</sup>H NMR (300 MHz, CDCl<sub>3</sub>) δ 8.32 (d, *J* = 8.4 Hz, 1H), 7.93 (s, 1H), 7.52-7.38 (m, 7H), 7.00 (dd, *J* = 9.6 Hz, 2.1 Hz, 1H), 6.67-6.60 (m, 2H), 5.19 (s, 2H), 3.82 (s, 3H), 3.59 (t, *J* = 4.8 Hz, 4H), 2.97 (t, *J* = 4.8 Hz, 4H). <sup>13</sup>C NMR (75 MHz, CDCl<sub>3</sub>) 160.3, 156.9, 154.7, 141.6, 141.1, 139.6, 136.9, 129.6, 128.8, 128.3, 127.9, 121.8, 117.0, 115.9, 112.4, 112.3, 105.4, 100.0, 80.2, 70.7, 55.6, 50.9, 28.6. HRMS (ESI): *m/z* calcd for C<sub>30</sub>H<sub>35</sub>N<sub>4</sub>O<sub>4</sub> [M+H]<sup>+</sup> 515.2659; found 515.2664.

**<sup>1</sup>H, <sup>13</sup>C NMR and Mass spectra of Compound 1:**

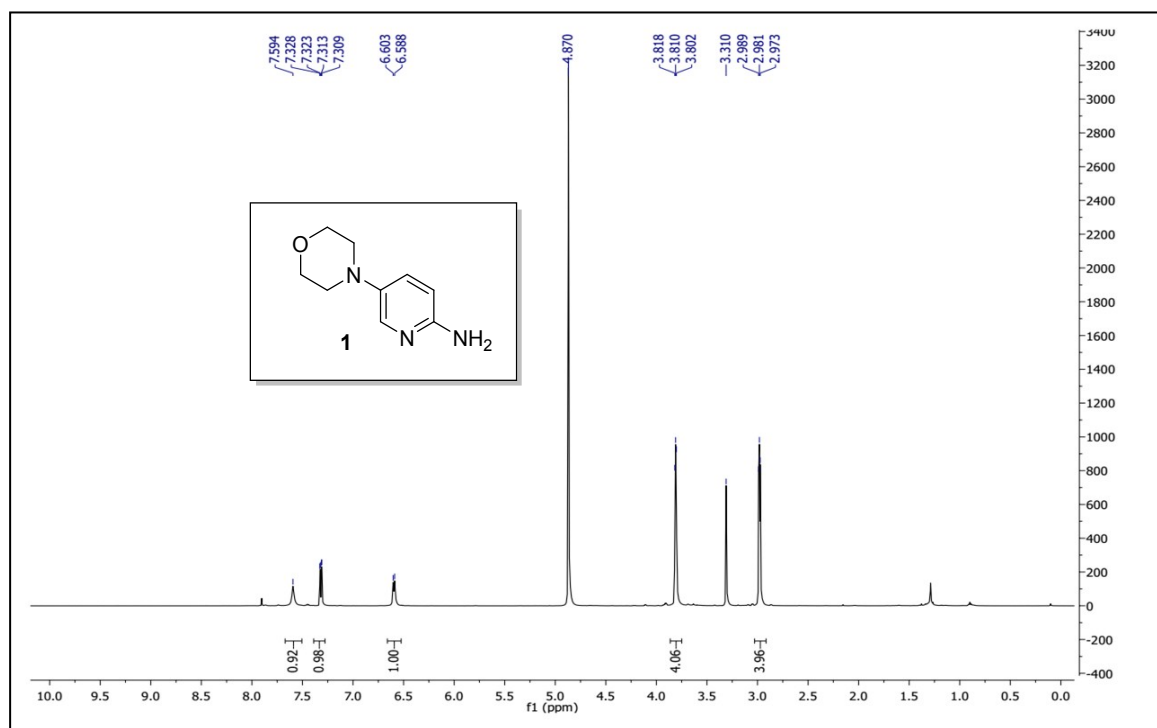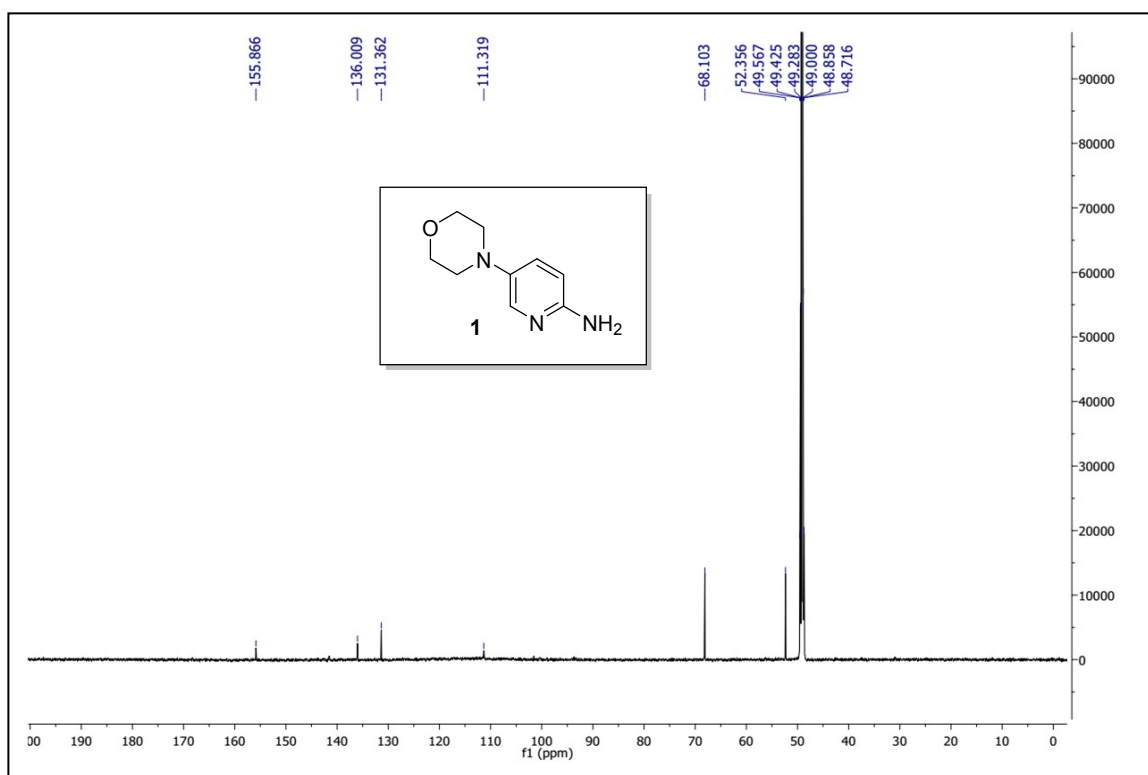

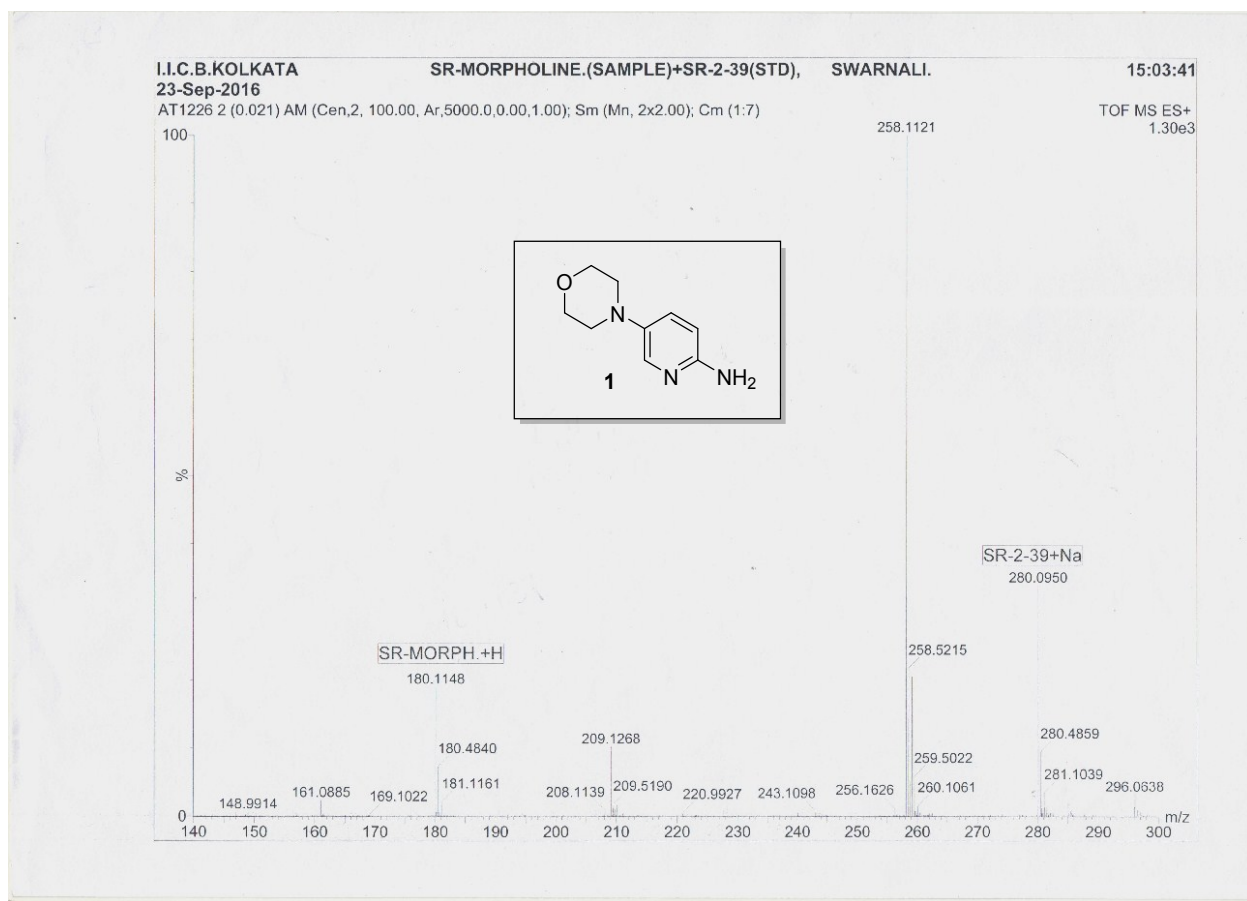

180.1148 is the  $[M+H]^+$  peak of **1**. 258.1121 and 280.0950 are the  $[M+H]^+$  and  $[M+Na]^+$  peak of standard compound.

# $^1\text{H}$ , $^{13}\text{C}$ NMR and Mass spectra of Compound 2:

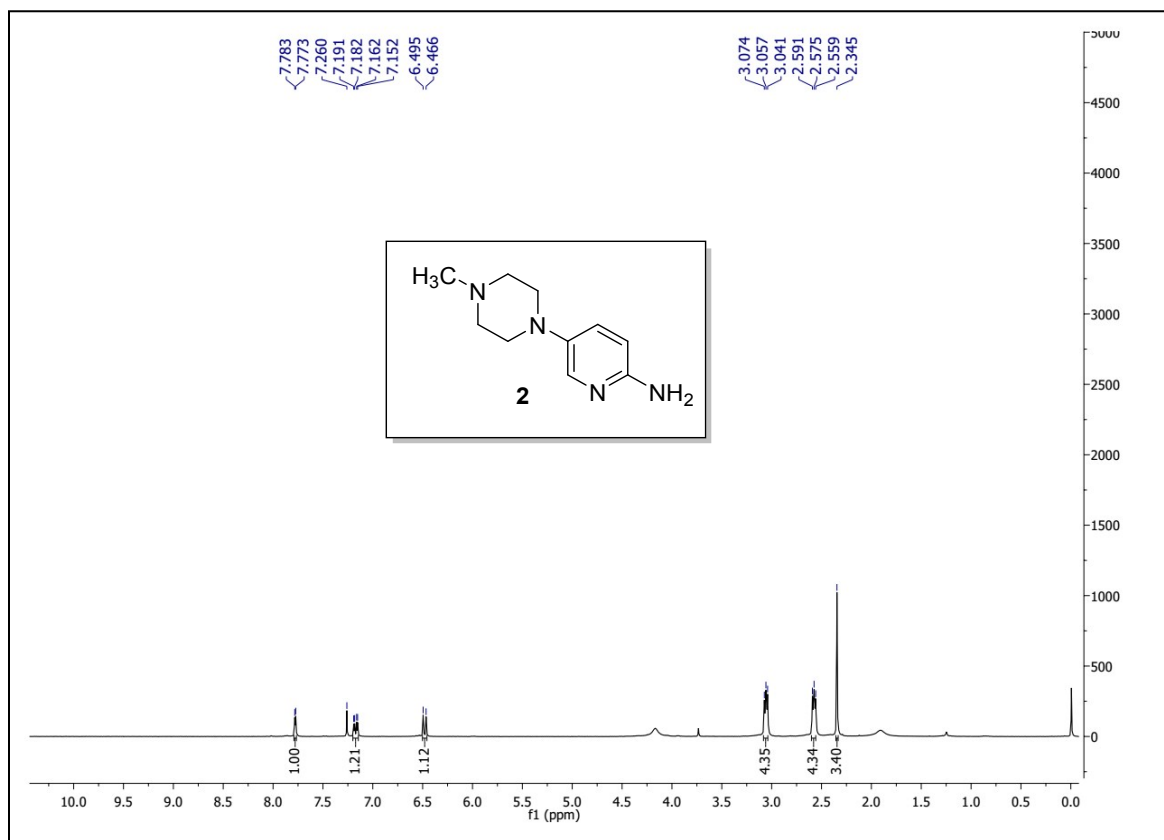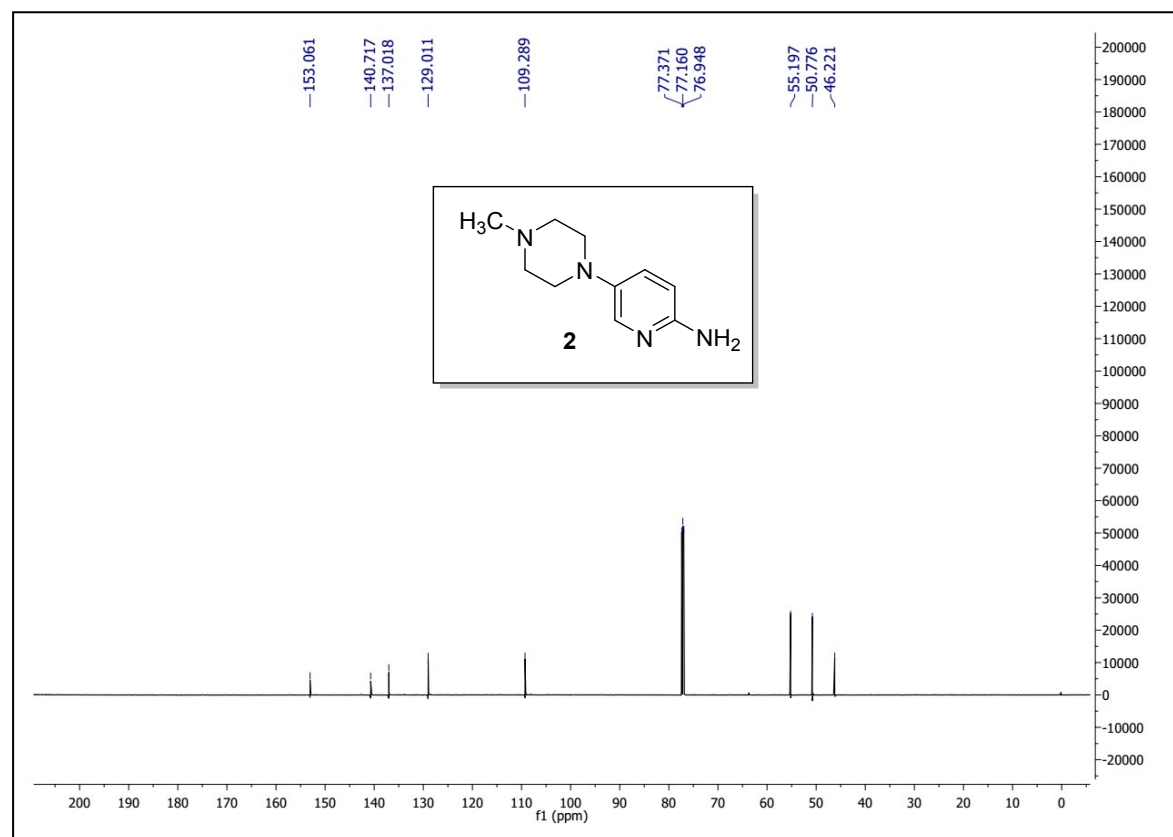

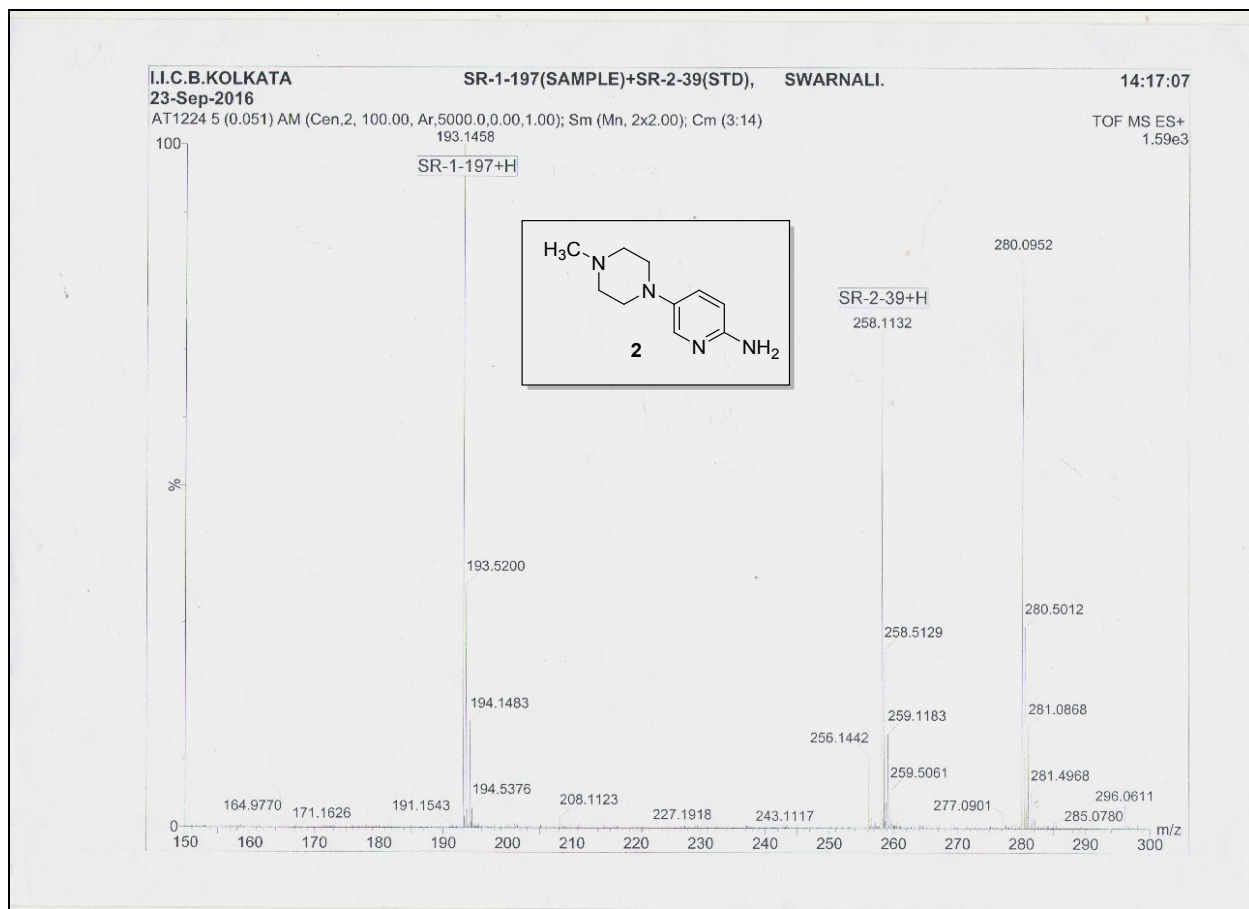

193.1458 is the  $[M+H]^+$  peak of **2** and 258.1132 and 289.0952 are the  $[M+H]^+$  and  $[M+Na]^+$  peak of standard compound.

# $^1\text{H}$ , $^{13}\text{C}$ NMR and Mass spectra of Compound 3:

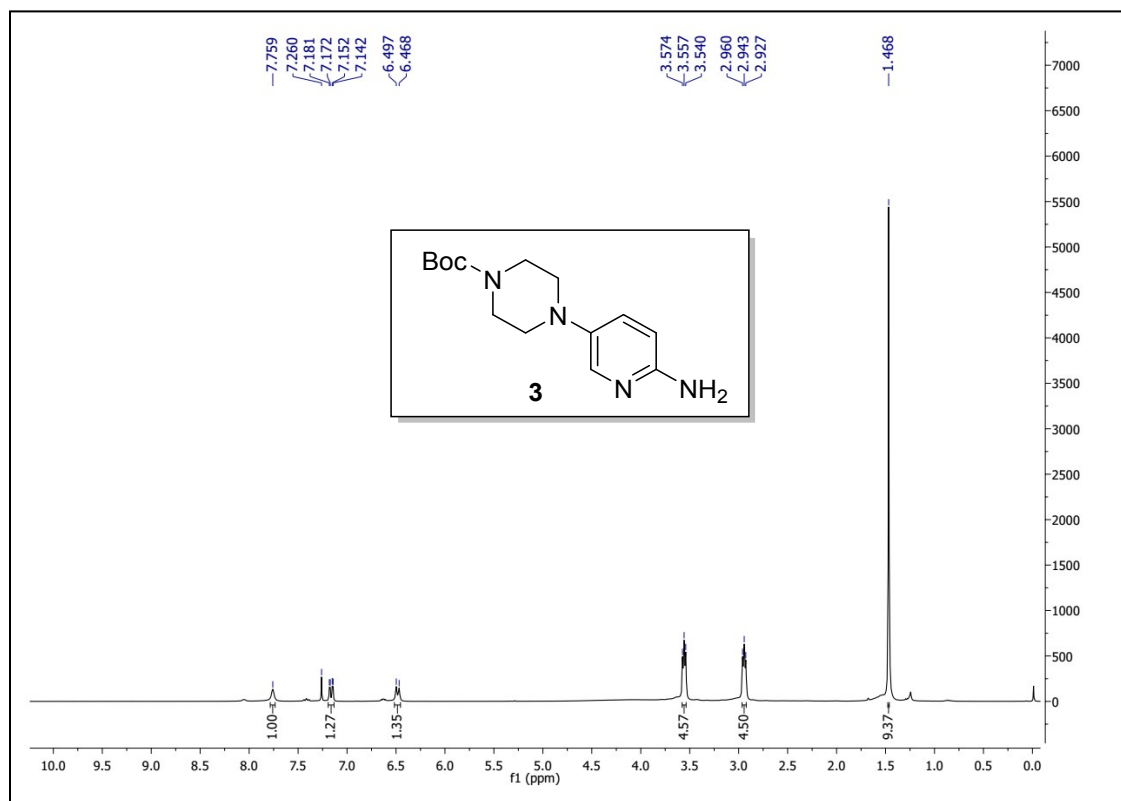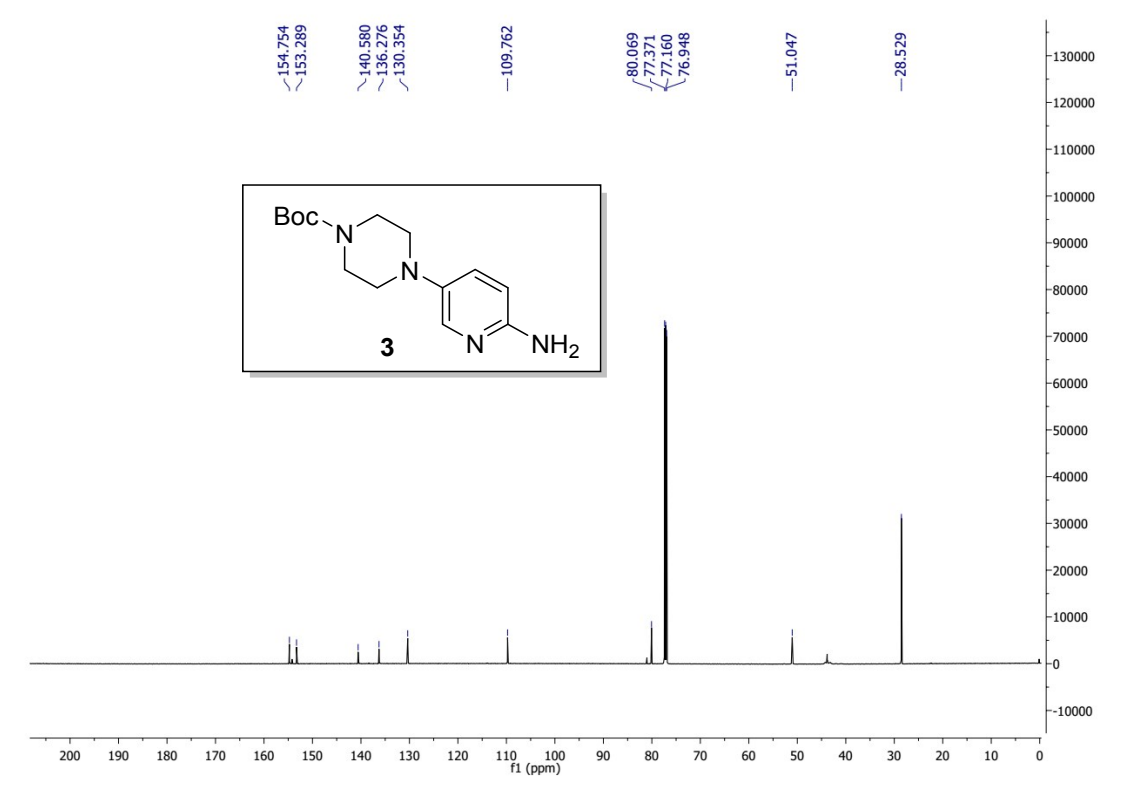

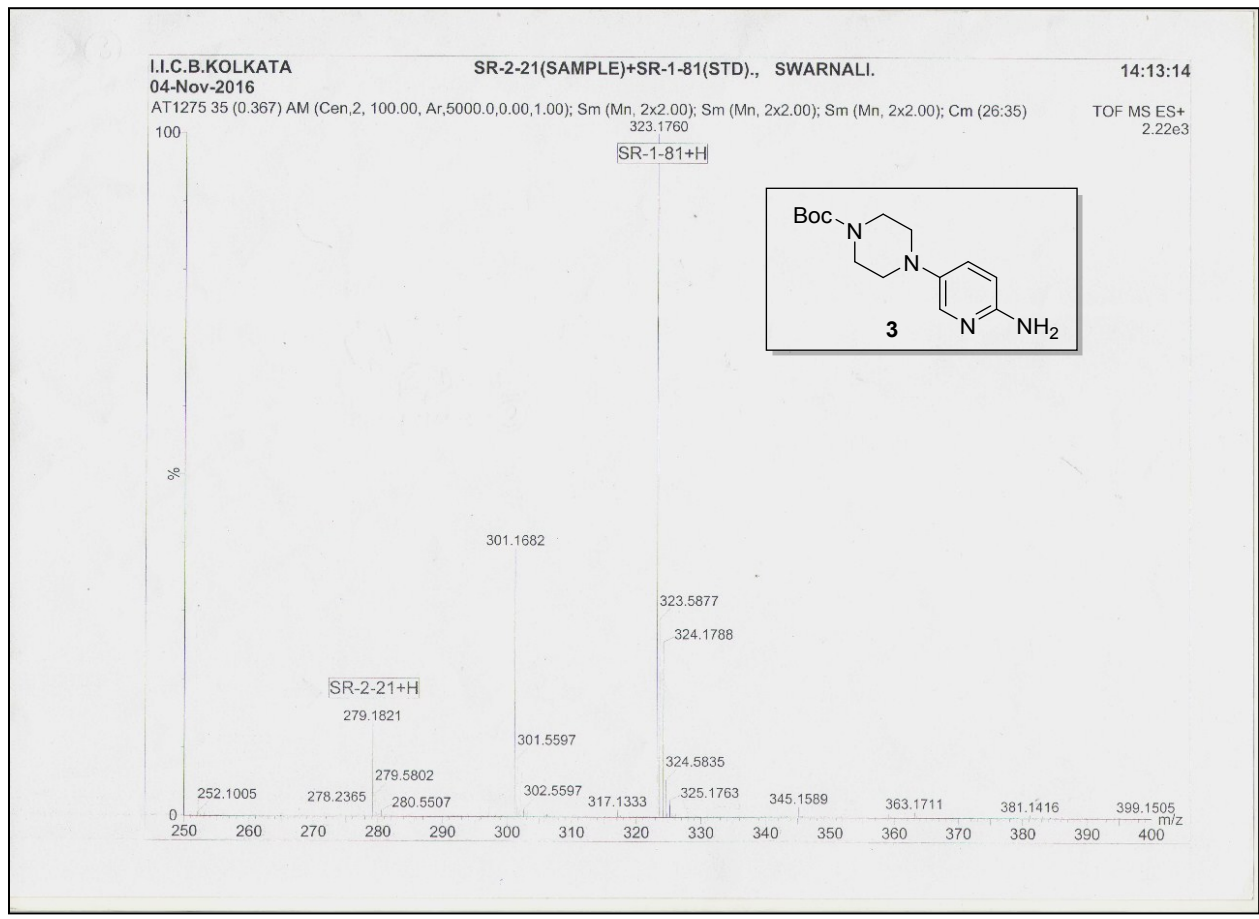

279.1821 is the  $[M+H]^+$  peak of **3** and 323.1760 is the  $[M+H]^+$  peak of standard.

**<sup>1</sup>H and <sup>13</sup>C NMR and Mass spectra of Compound 4:**

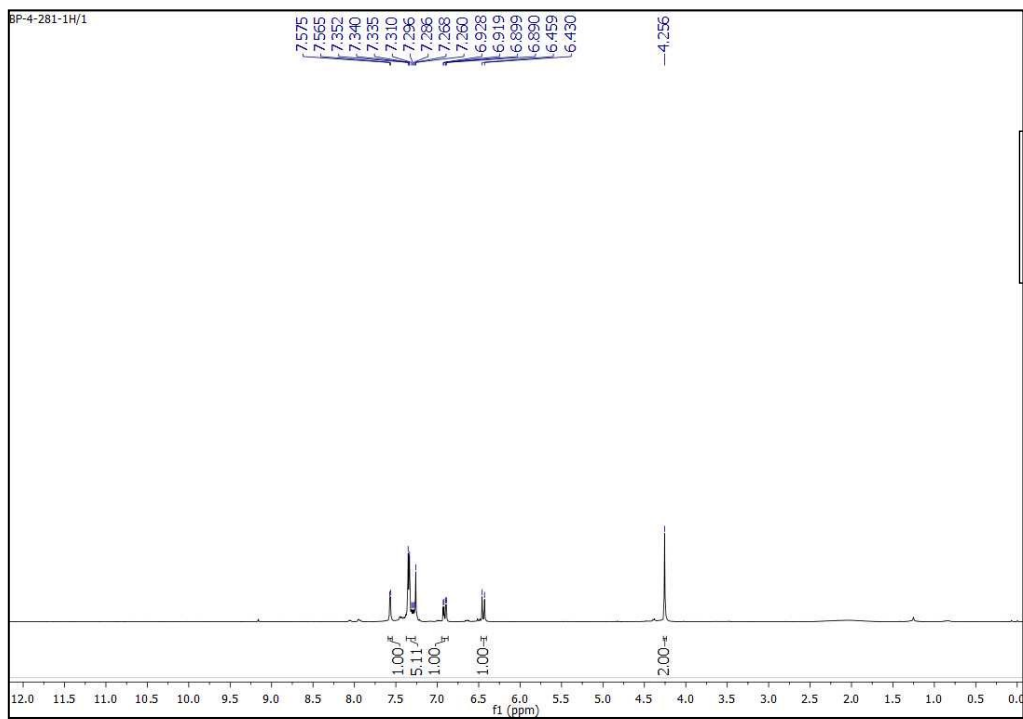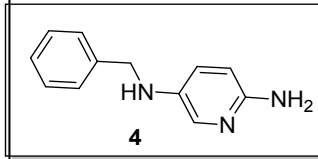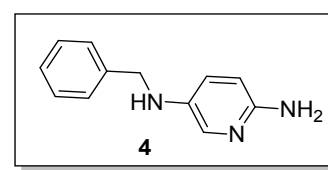



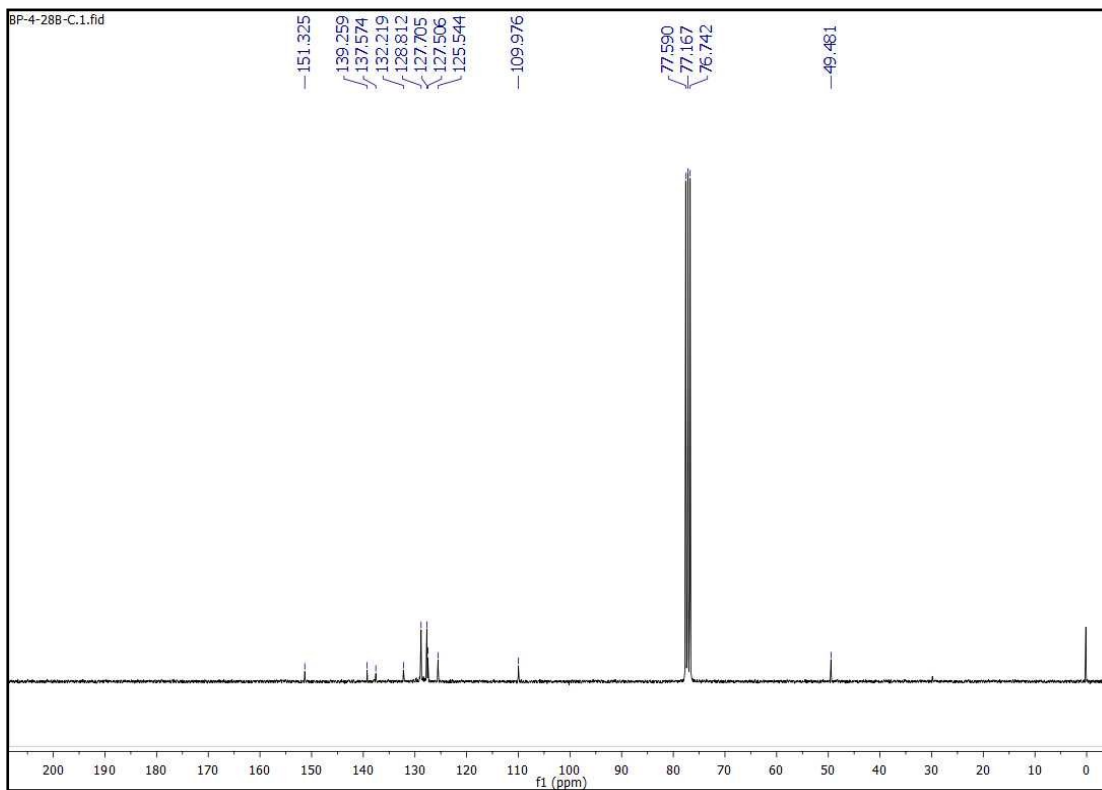

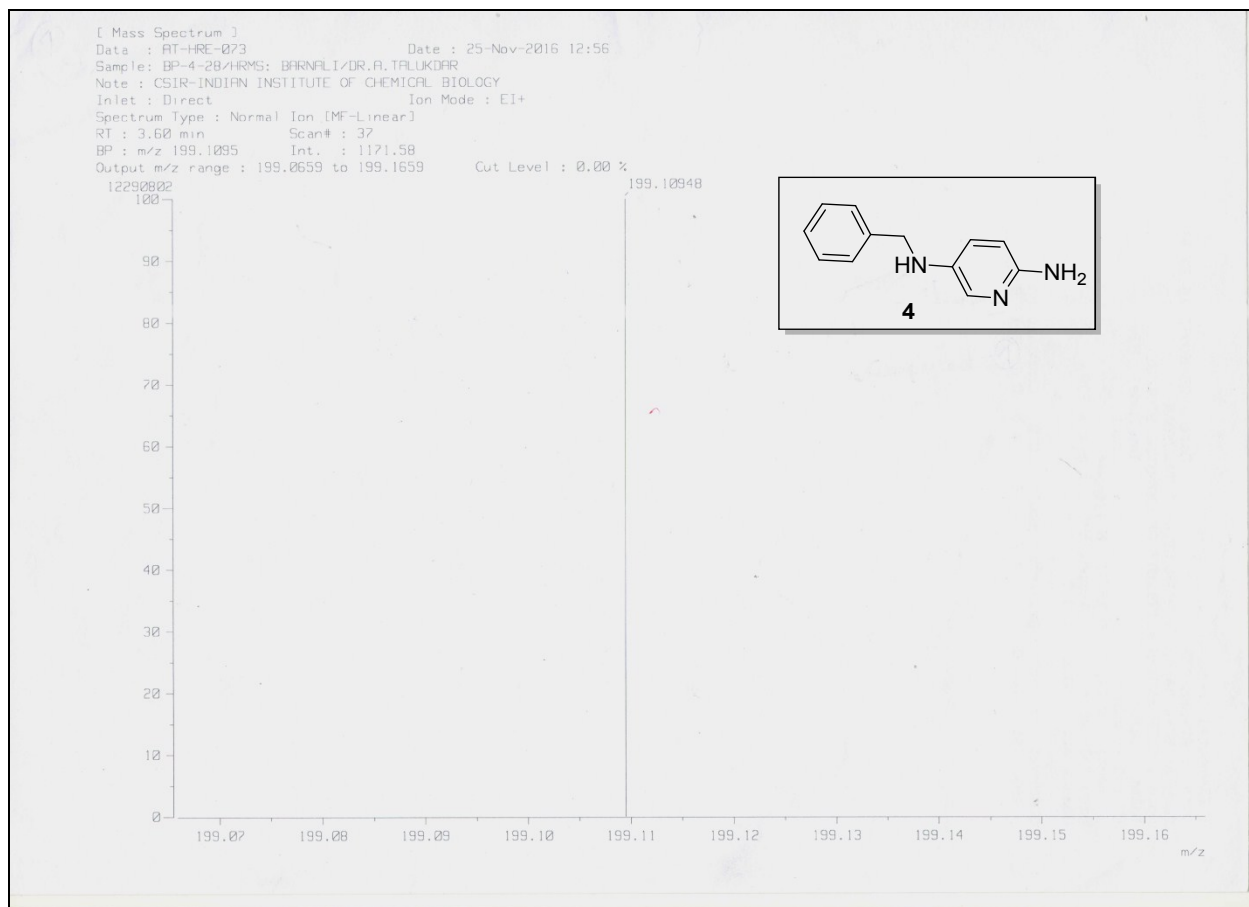

Mass Spectra of compound **4**.

**$^1\text{H}$ ,  $^{13}\text{C}$  NMR and Mass spectra of Compound 5:**

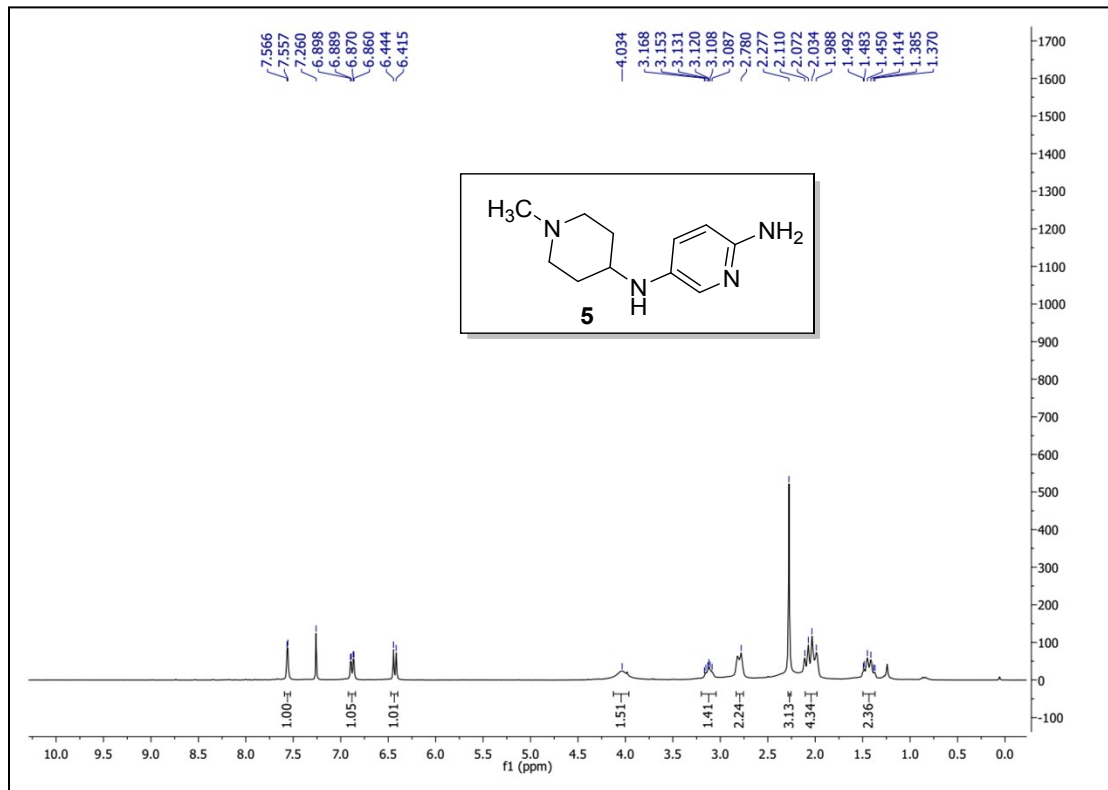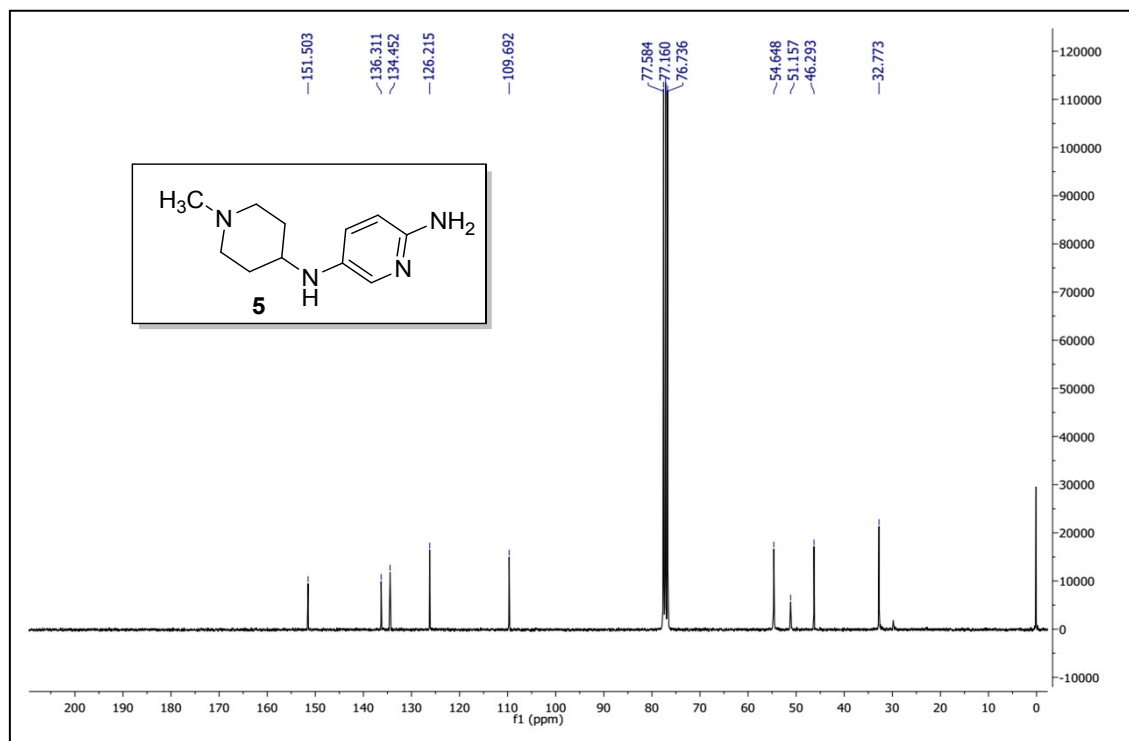

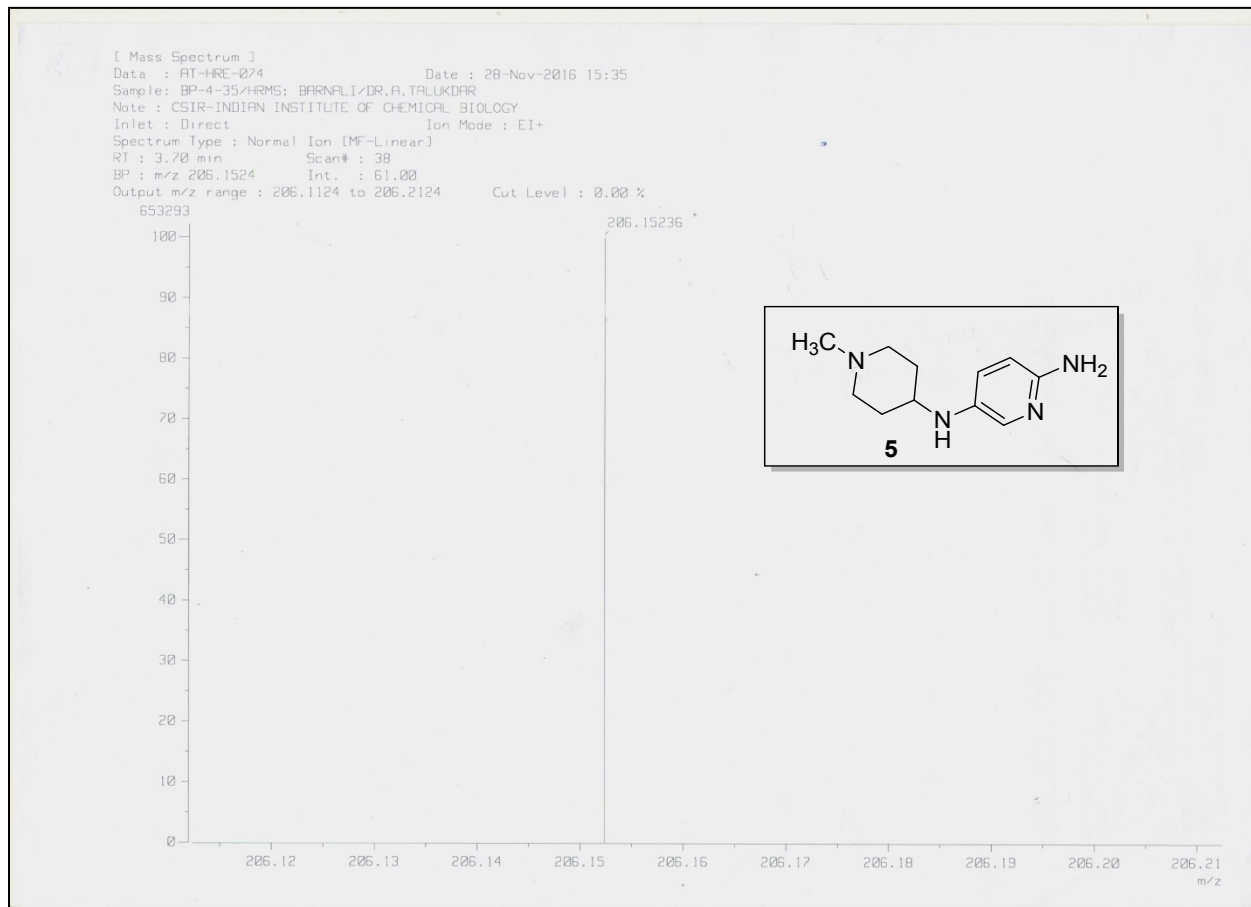

Mass Spectra of compound **5**.

# $^1\text{H}$ , $^{13}\text{C}$ NMR and Mass spectra of Compound 6:

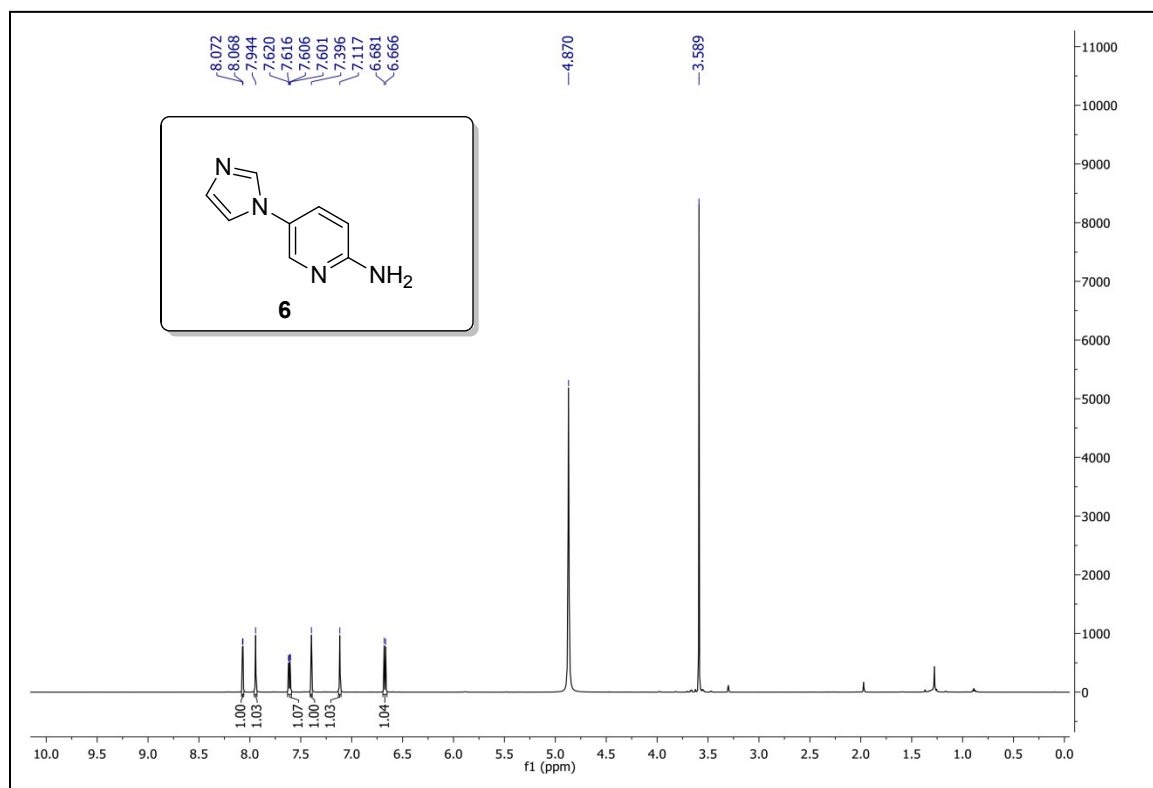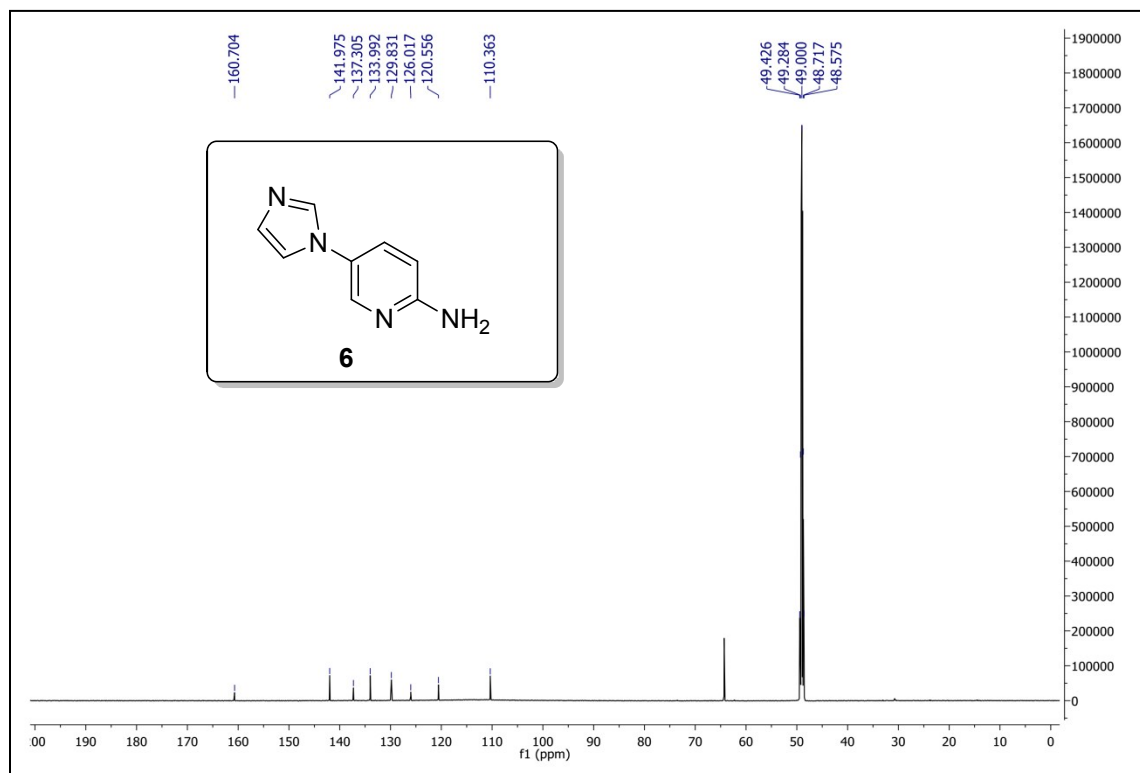

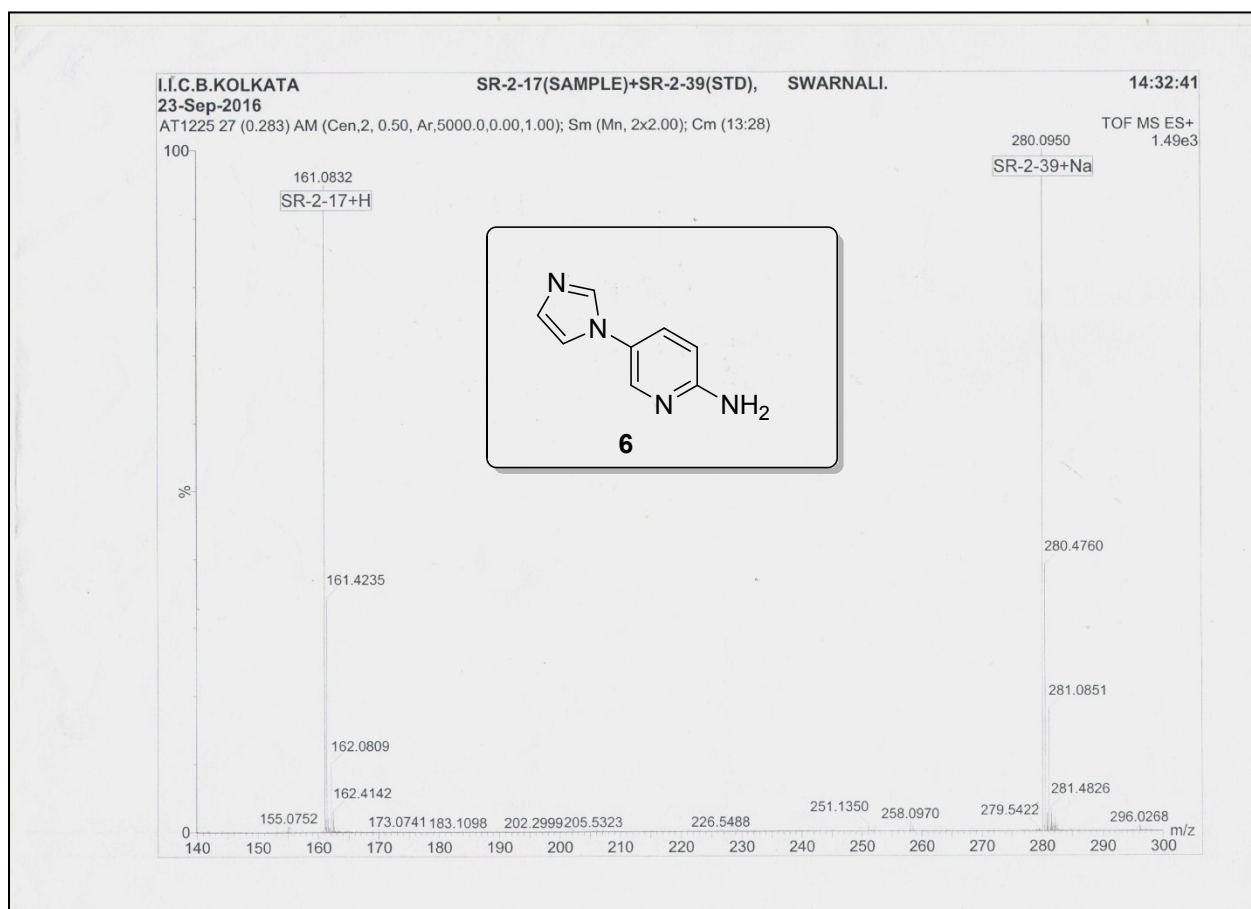

161.0832 is the  $[M+H]^+$  peak of **6** and 280.0950 is the  $[M+Na]^+$  peak of standard.

# $^1\text{H}$ , $^{13}\text{C}$ NMR and Mass spectra of Compound 7:

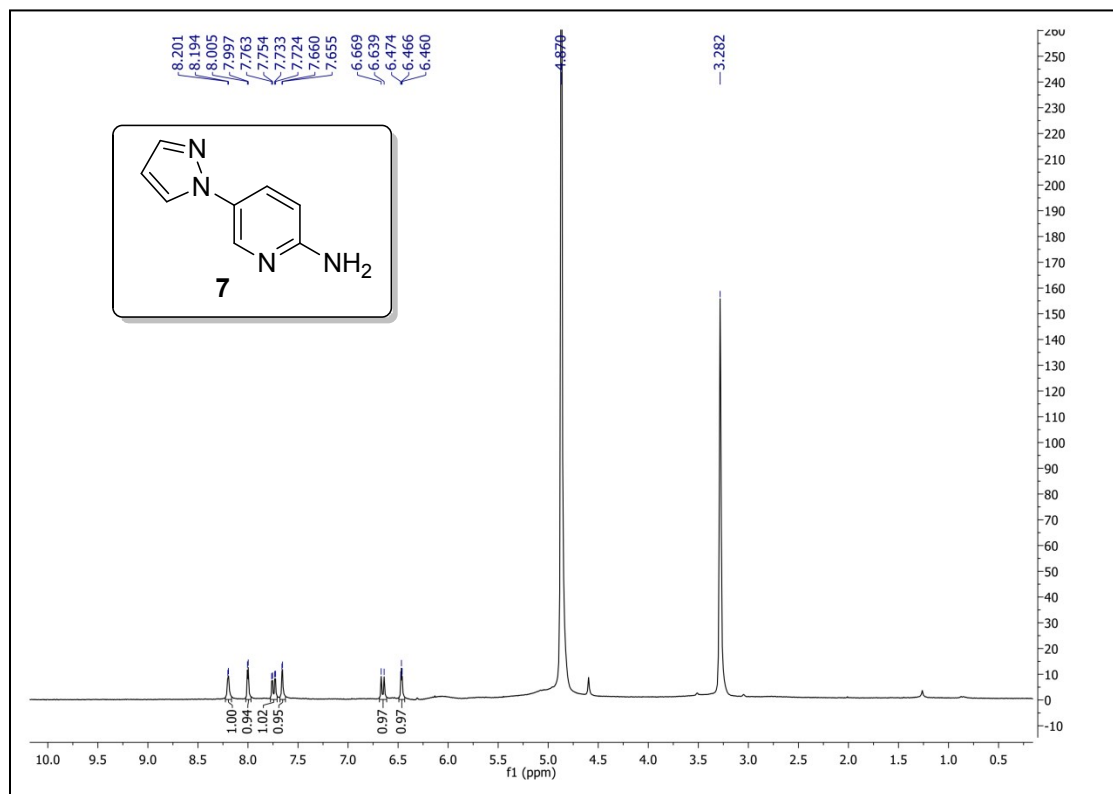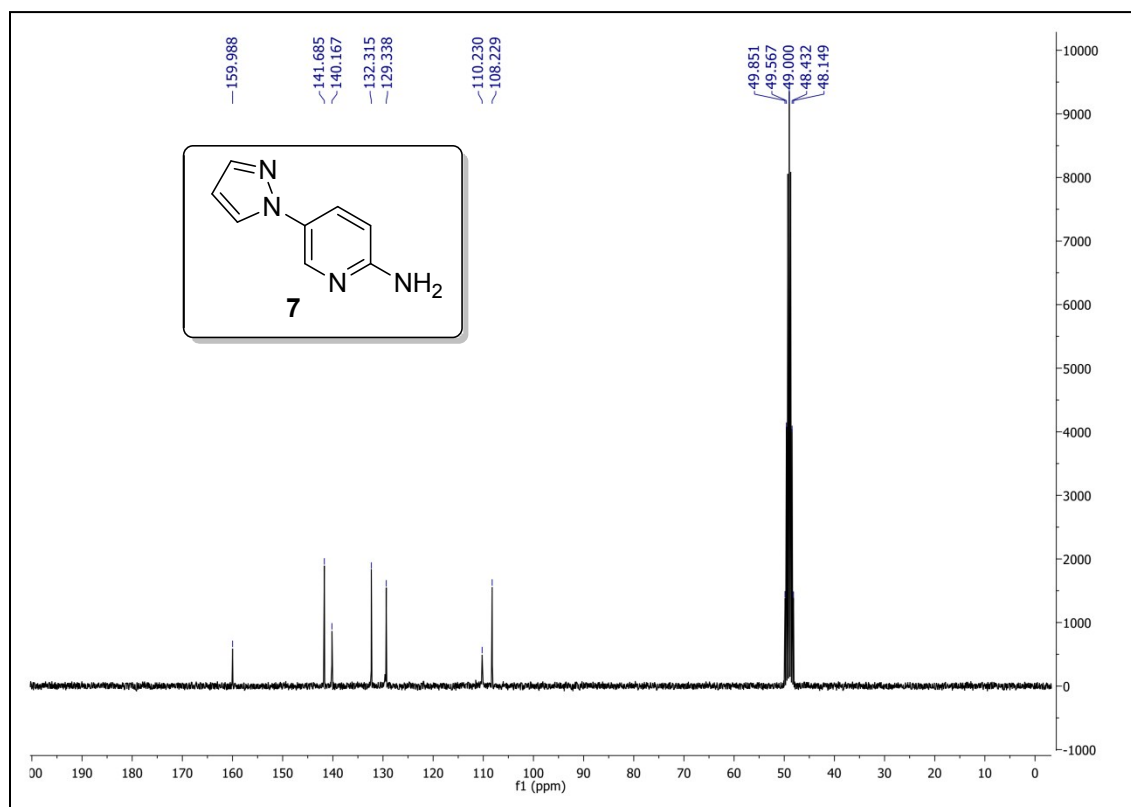

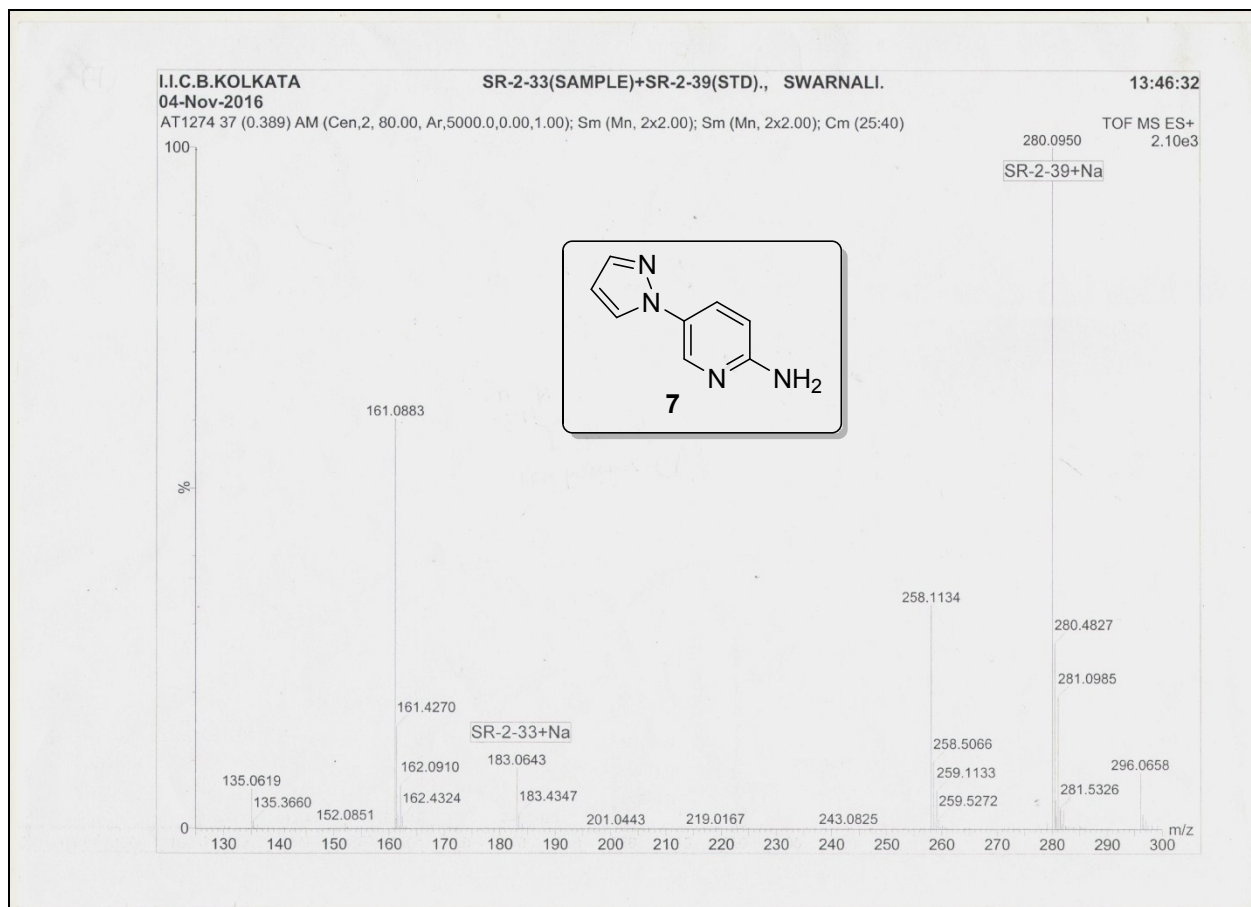

161.0883 and 183.0643 are the  $[M+H]^+$  and  $[M+Na]^+$  peak of 7. 258.1134 and 280.0950 are the  $[M+H]^+$  and  $[M+Na]^+$  peak of standard.

**$^1H$ ,  $^{13}C$  NMR and Mass spectra of Compound 8:**



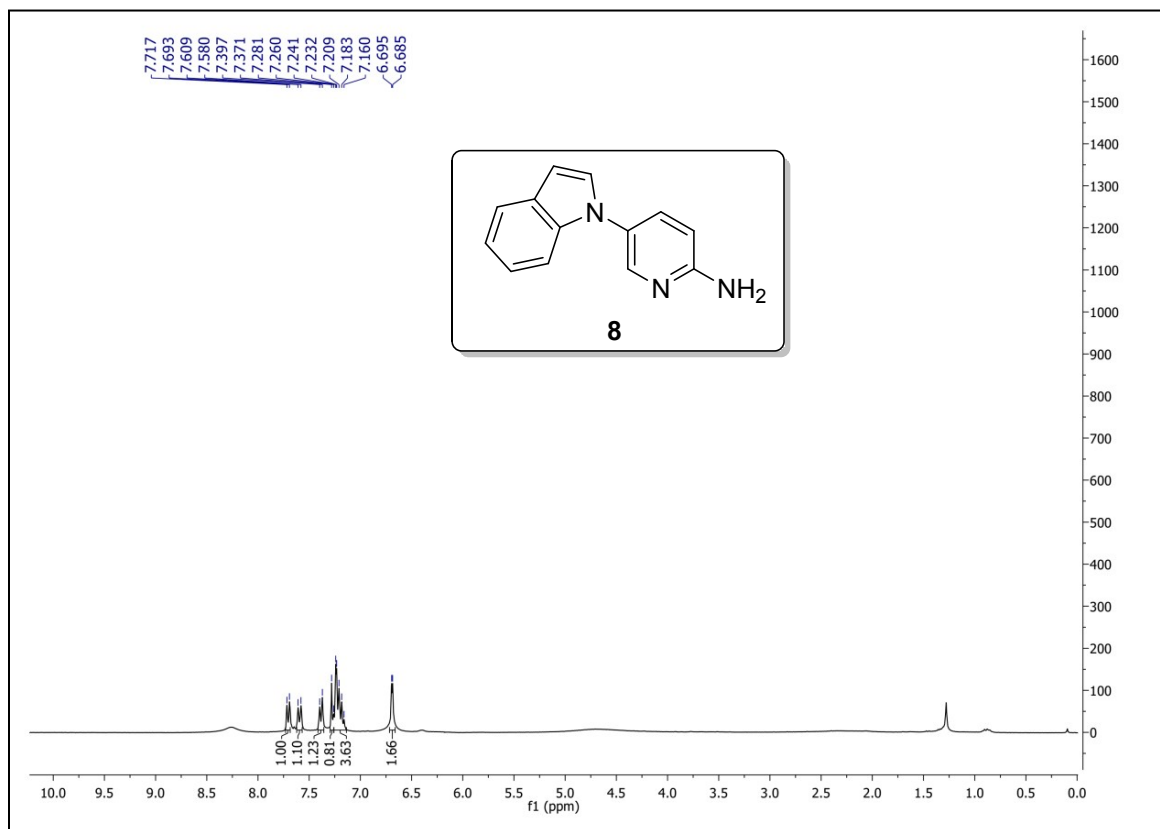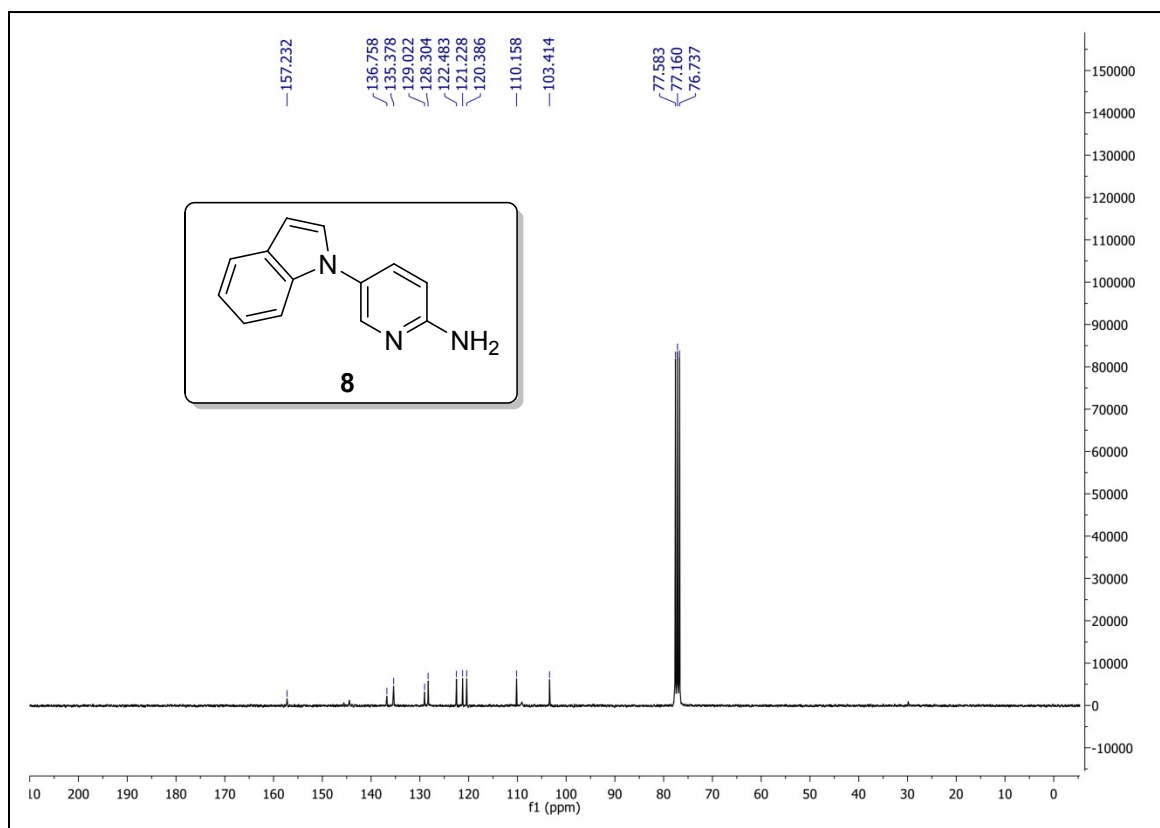

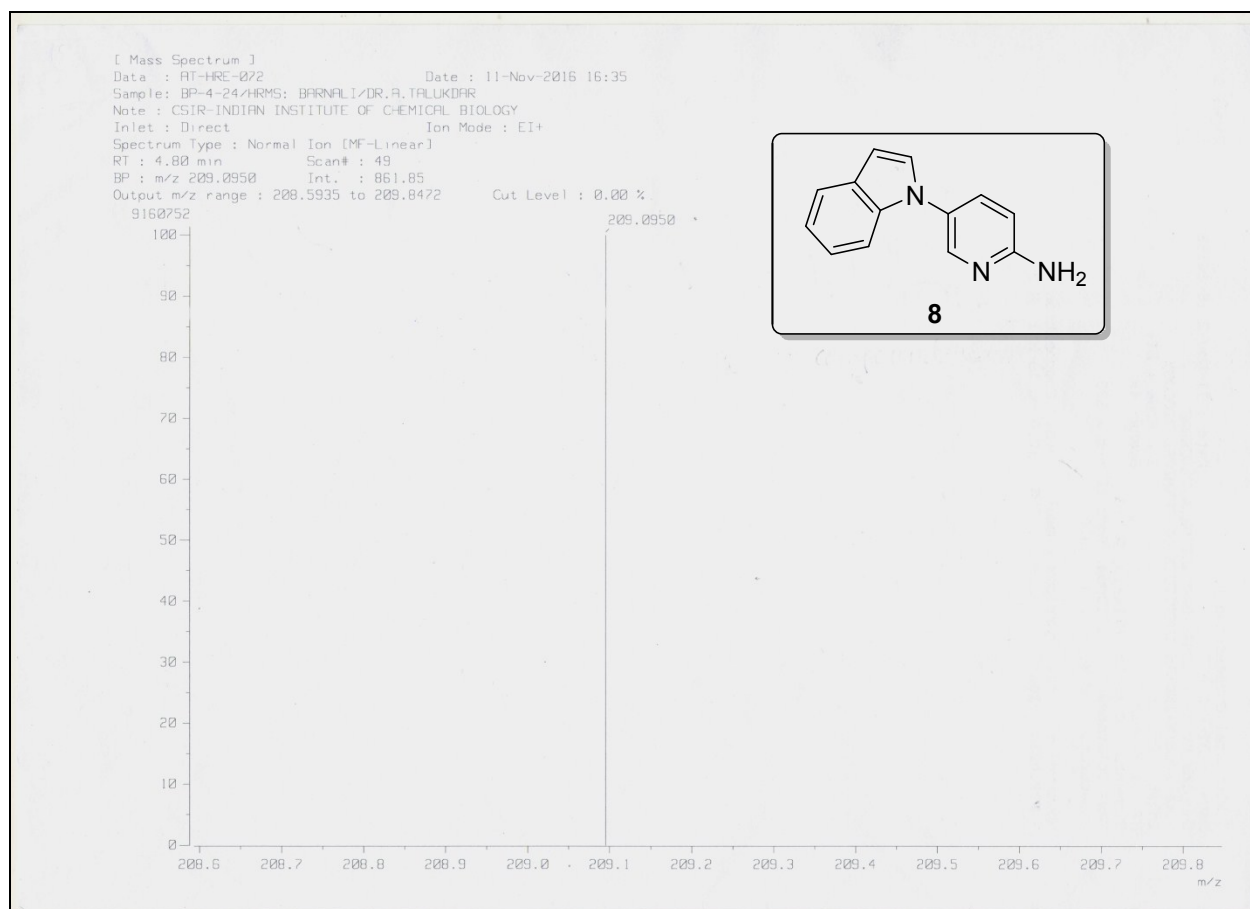

Mass Spectrum of **8**.

**<sup>1</sup>H, <sup>13</sup>C NMR and Mass spectra of Compound 9:**

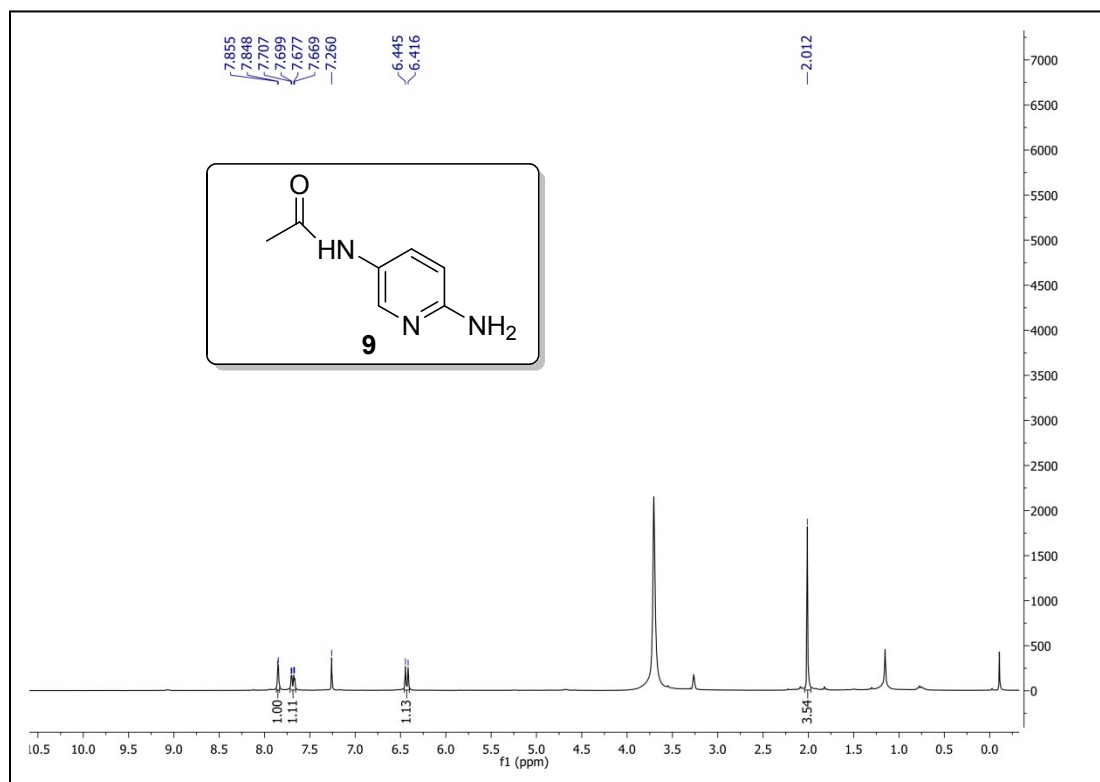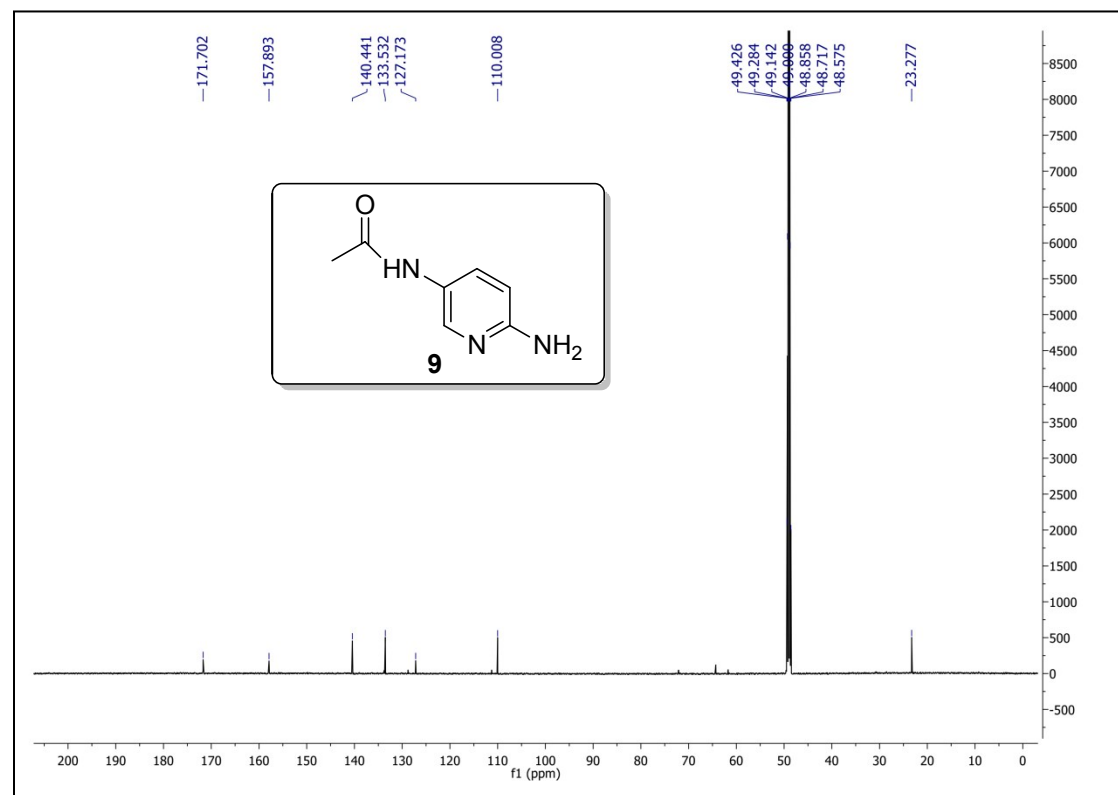

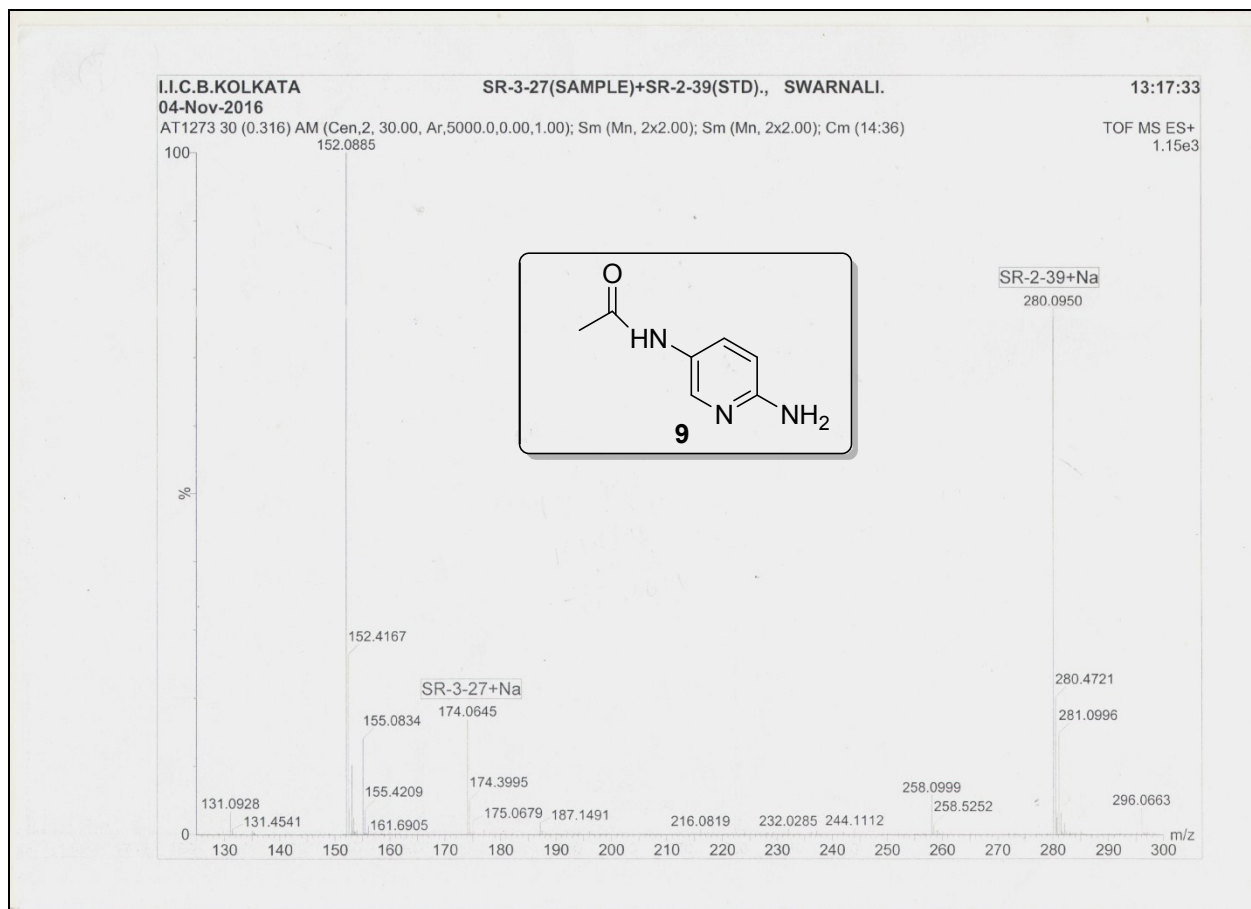

152.0885 and 174.0645 are the  $[M+H]^+$  and  $[M+Na]^+$  peak of **9**. 258.0999 and 280.0950 are the  $[M+H]^+$  and  $[M+Na]^+$  peak of standard compound.

**$^1\text{H}$ ,  $^{13}\text{C}$  NMR and Mass spectra of compound 10:**

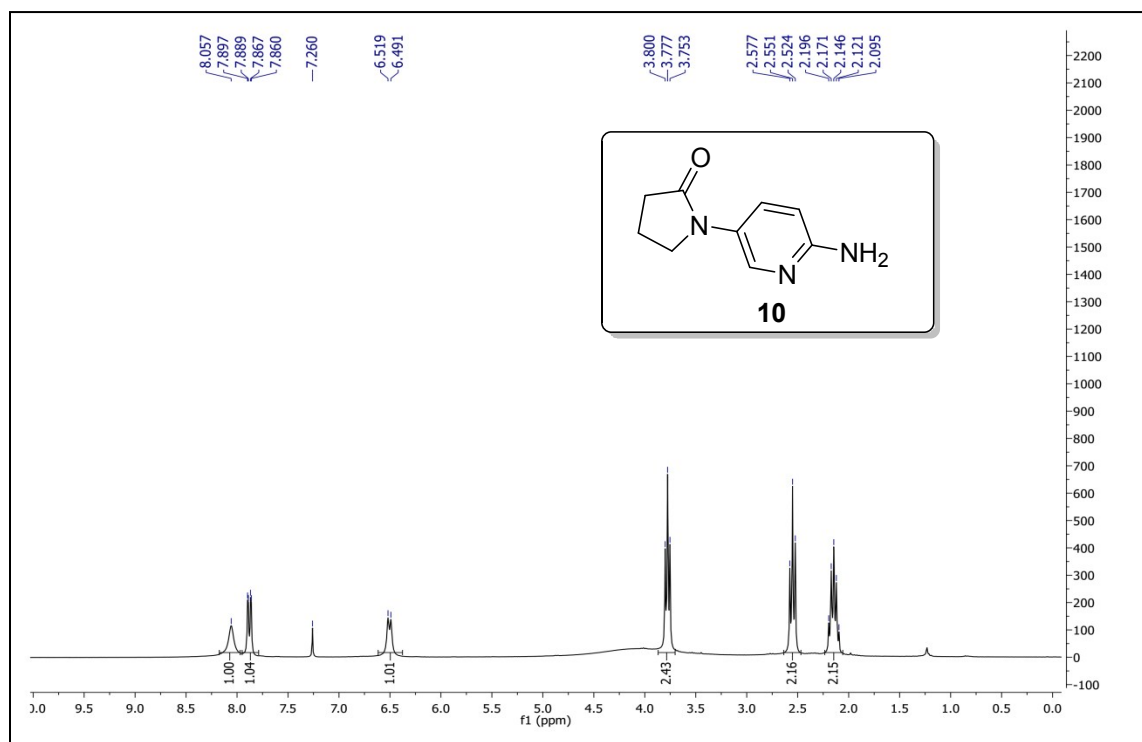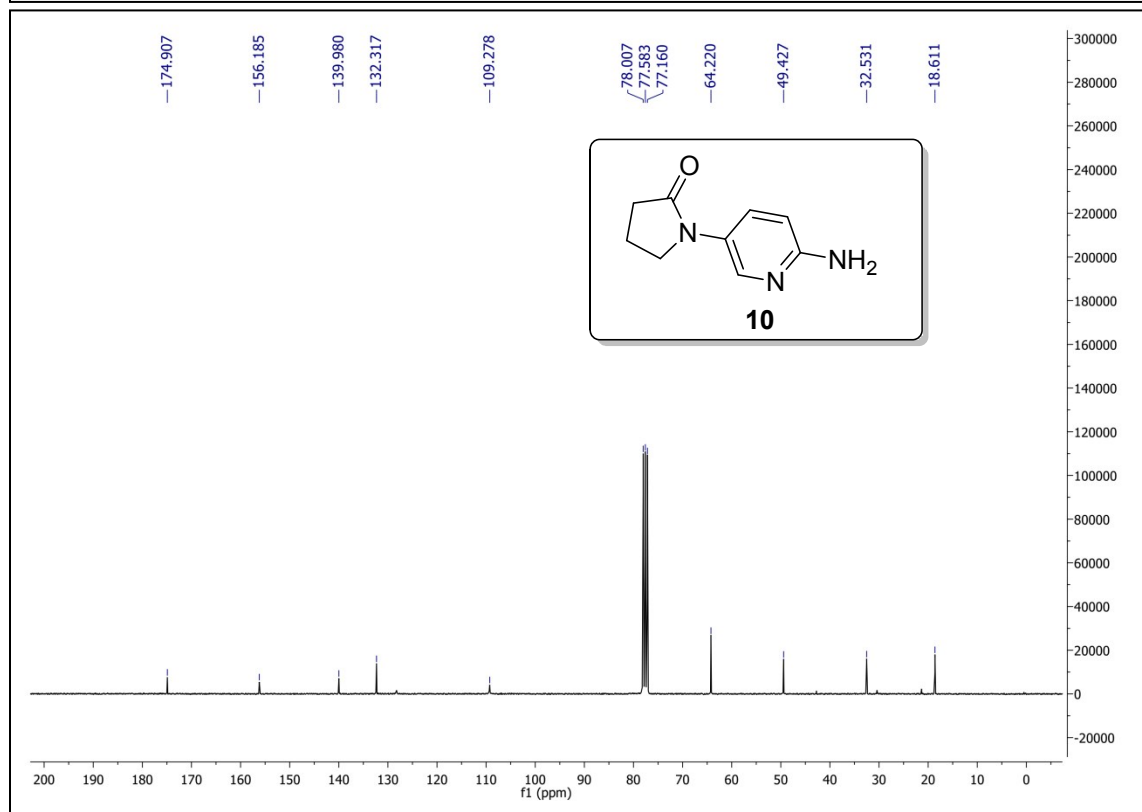

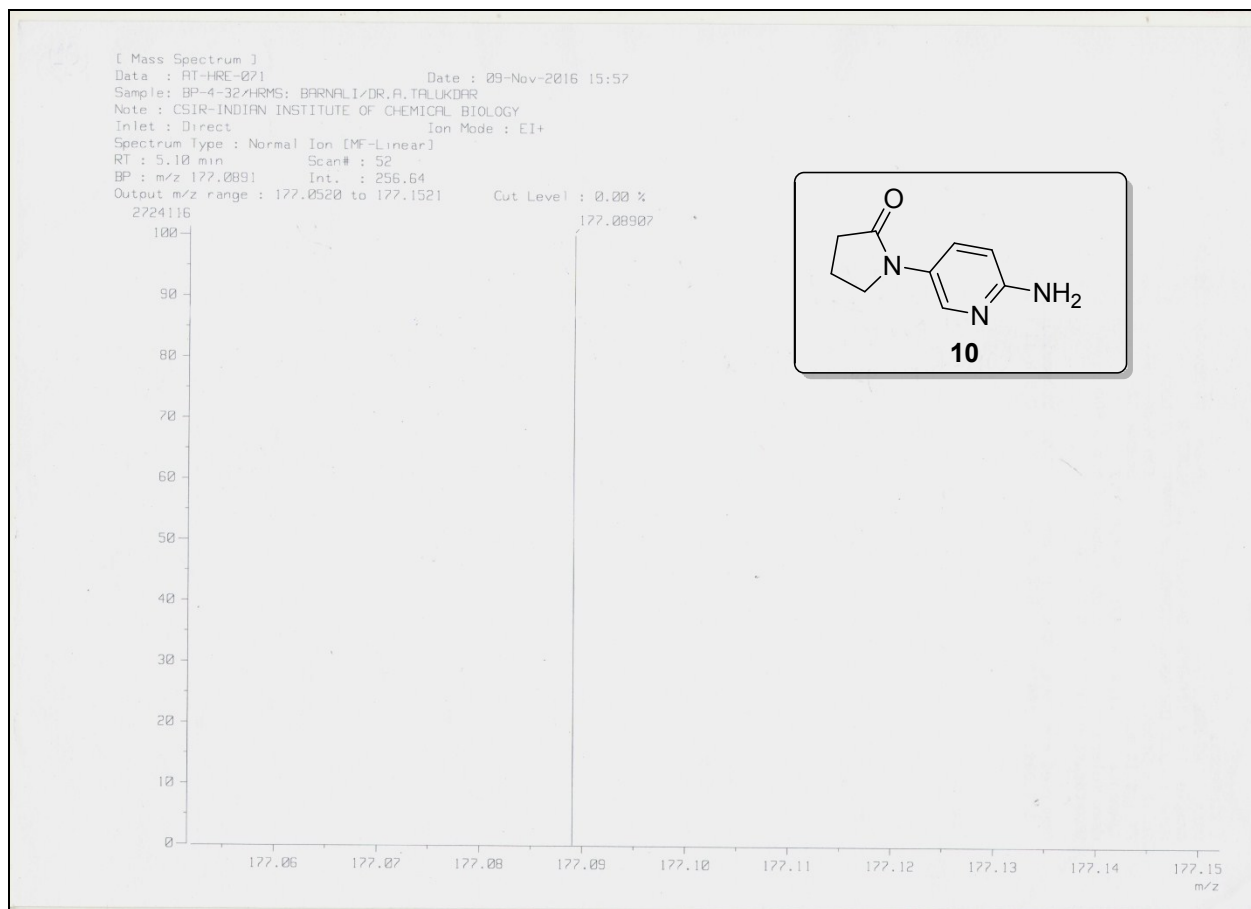

Mass Spectrum of **10**.

**<sup>1</sup>H, <sup>13</sup>C NMR and Mass spectra of Compound 11:**

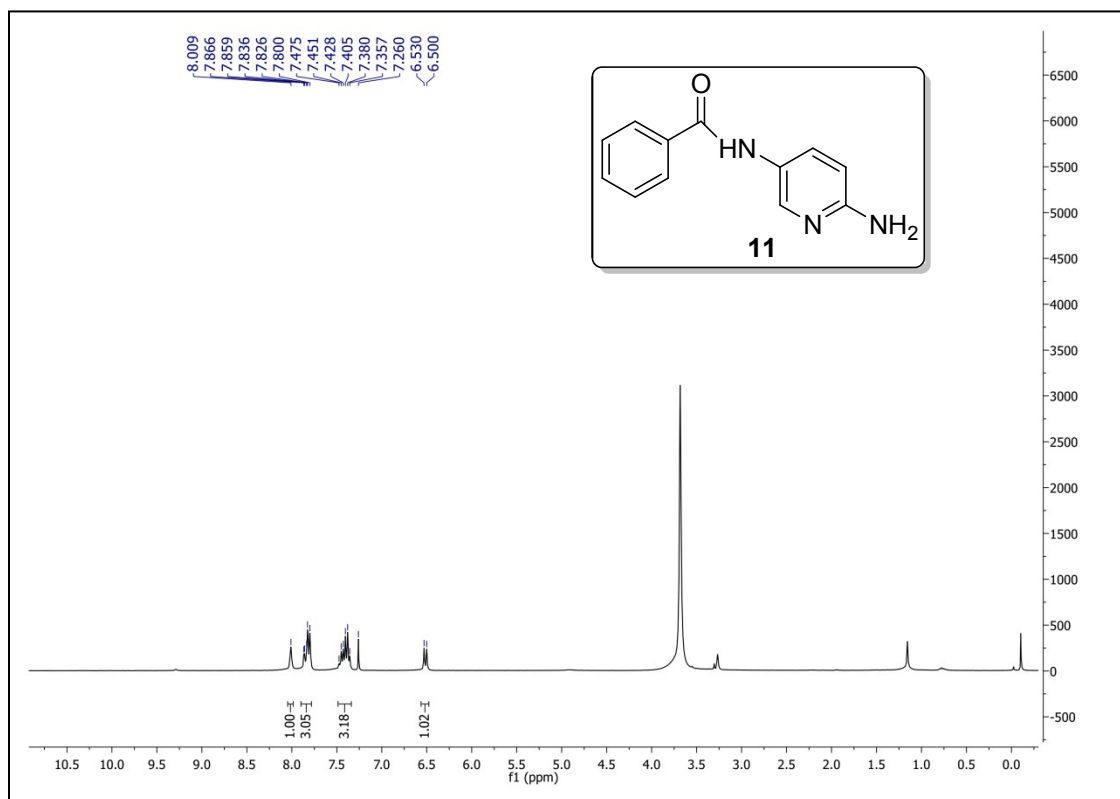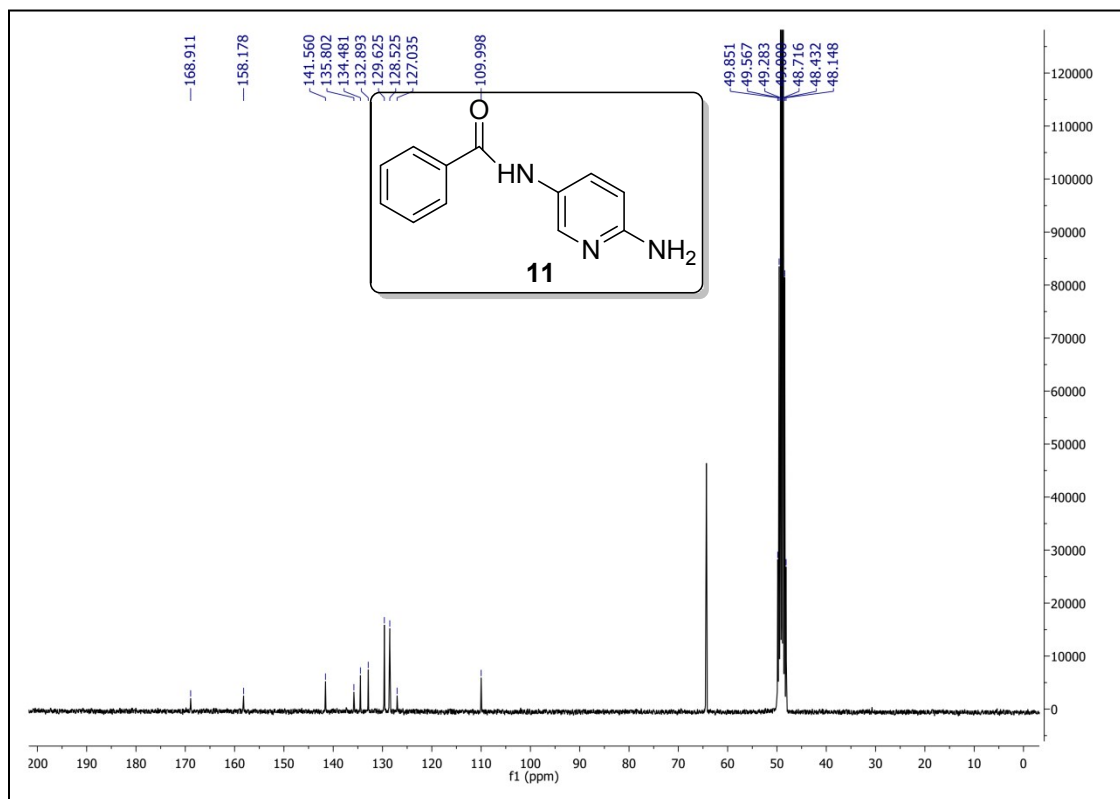

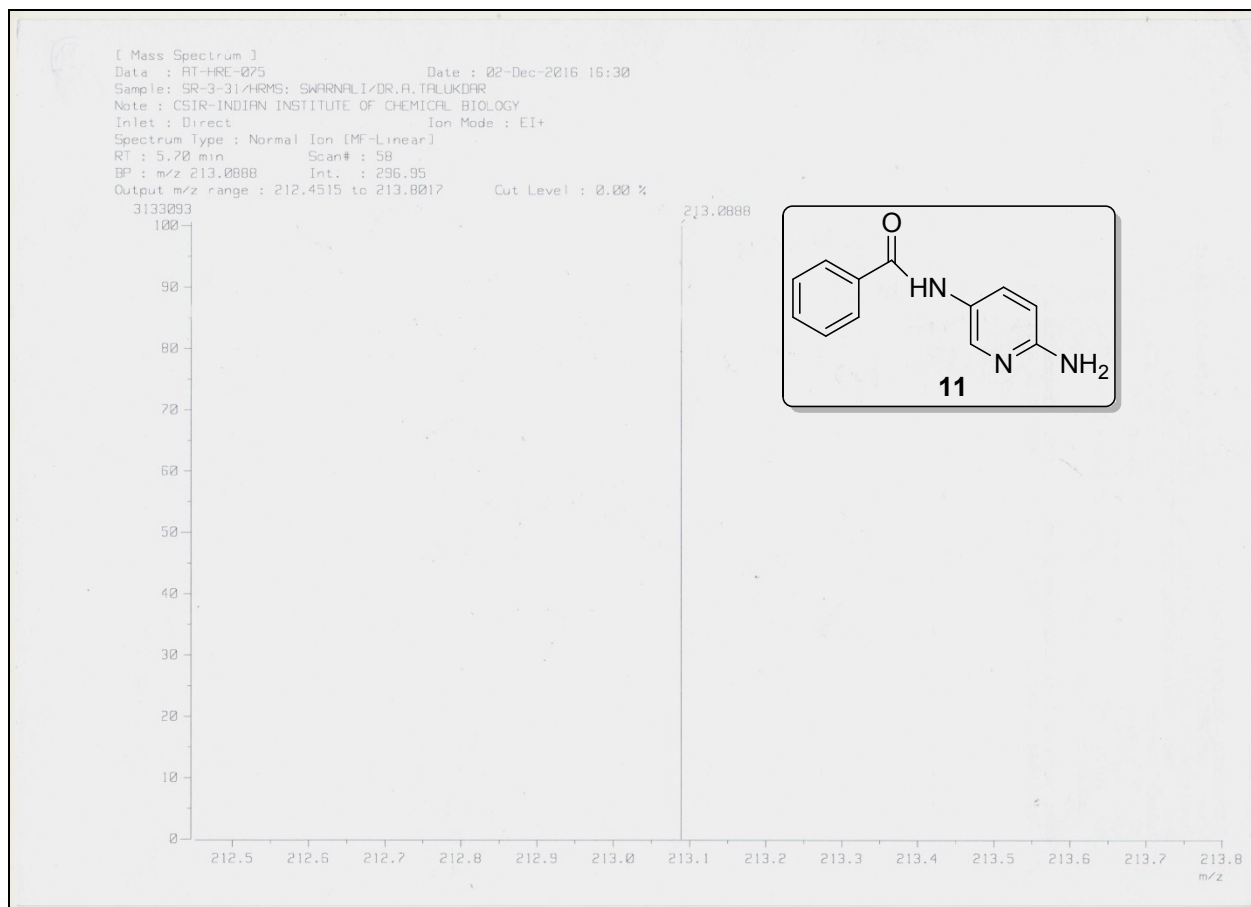

Mass Spectrum of **11**.

**$^1\text{H}$ ,  $^{13}\text{C}$  NMR and Mass spectra of Compound 12:**



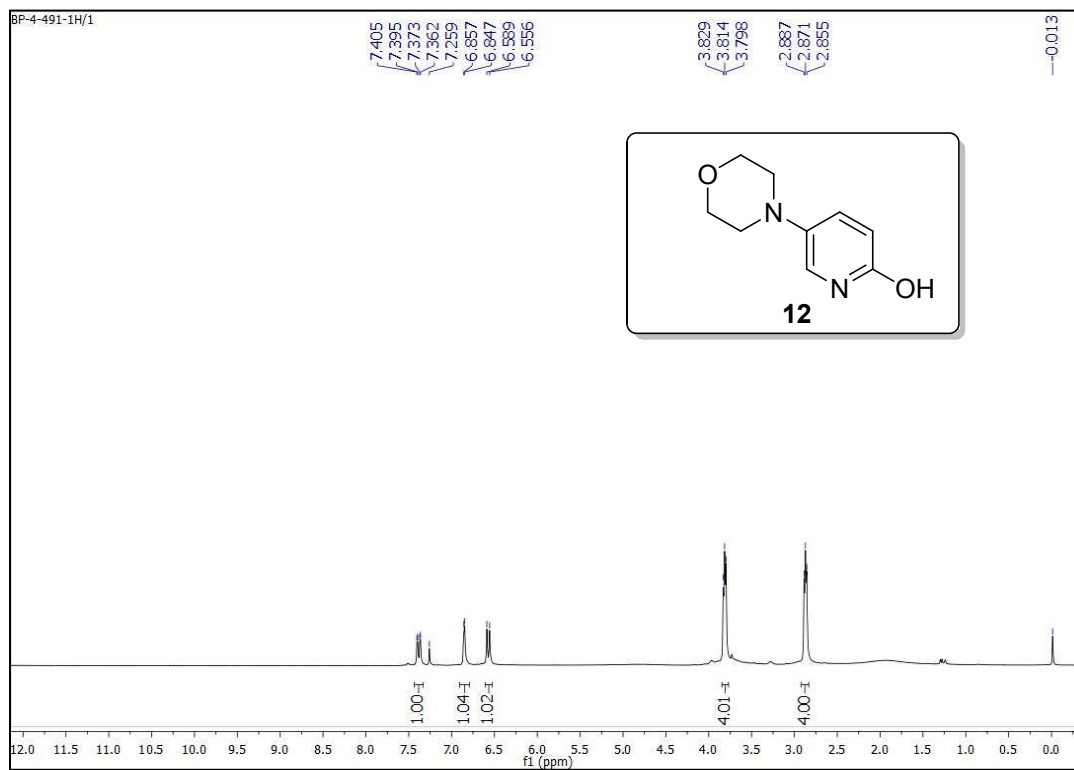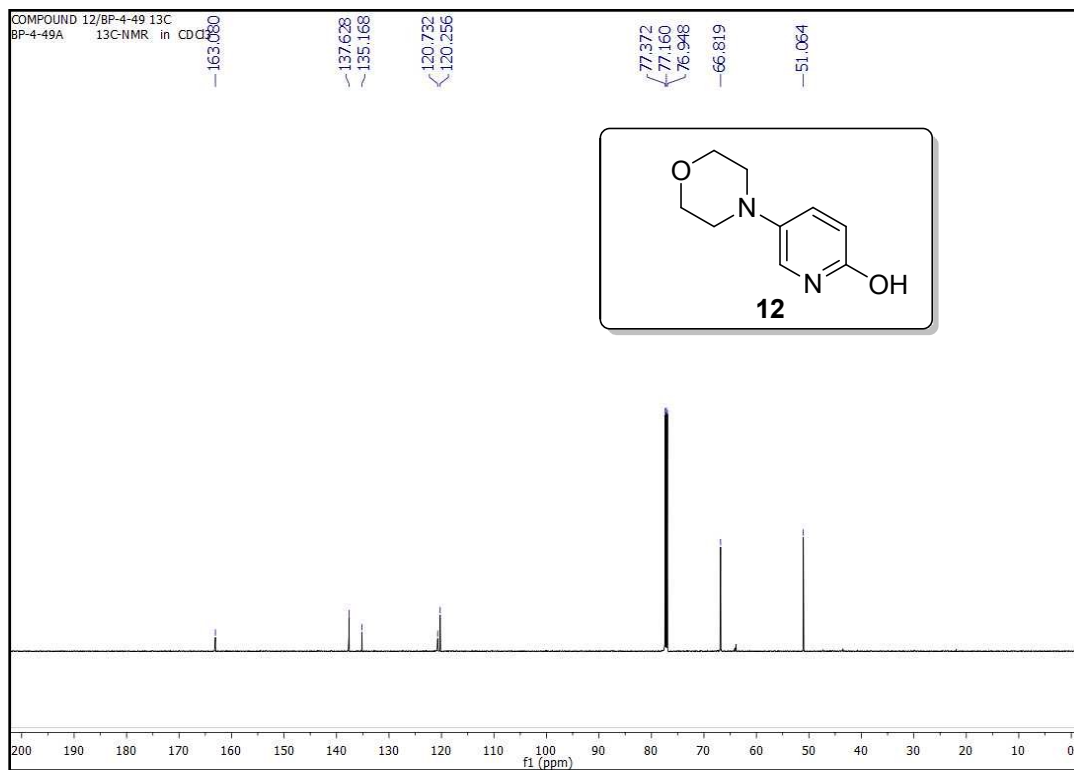

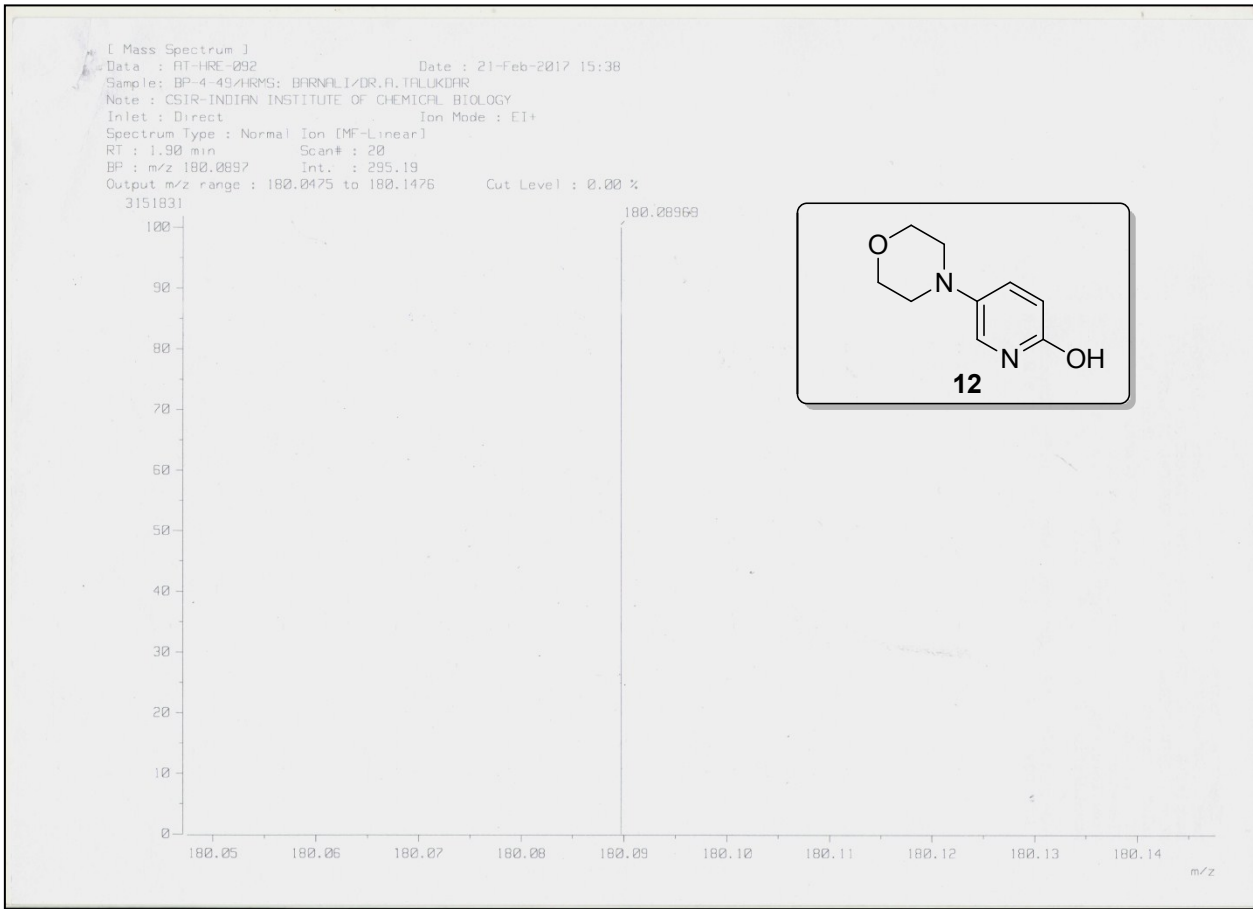

Mass Spectrum of **12**.

# <sup>1</sup>H, <sup>13</sup>C NMR and Mass spectra of Compound 13:

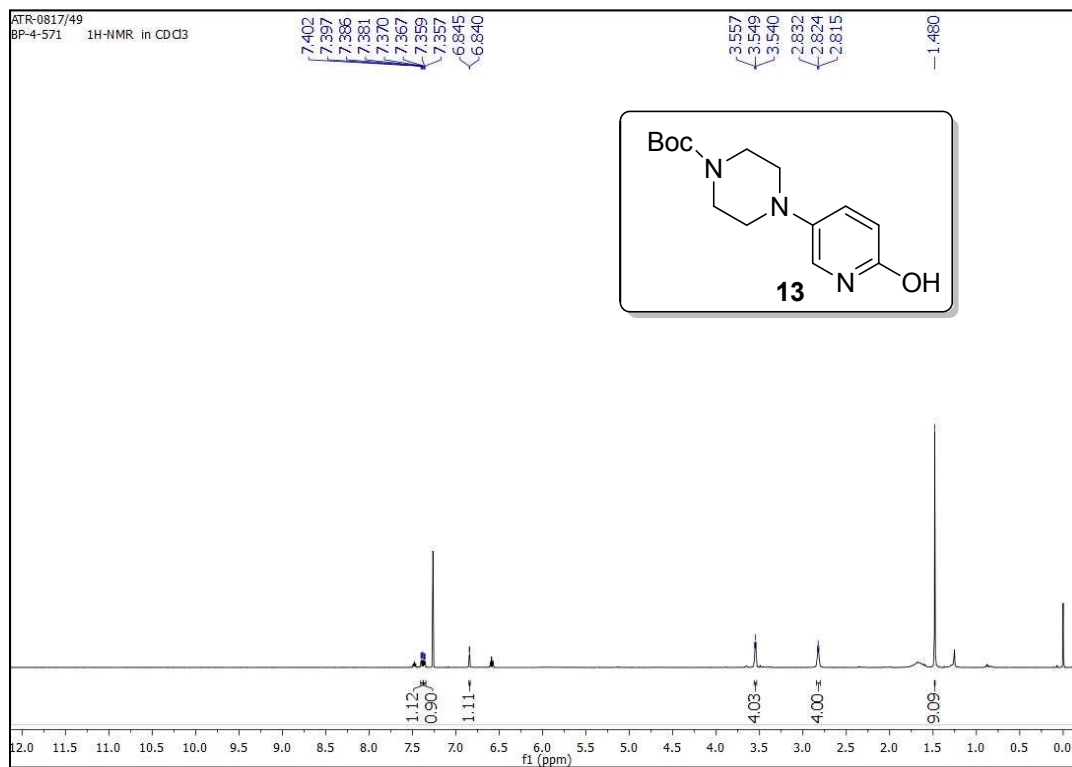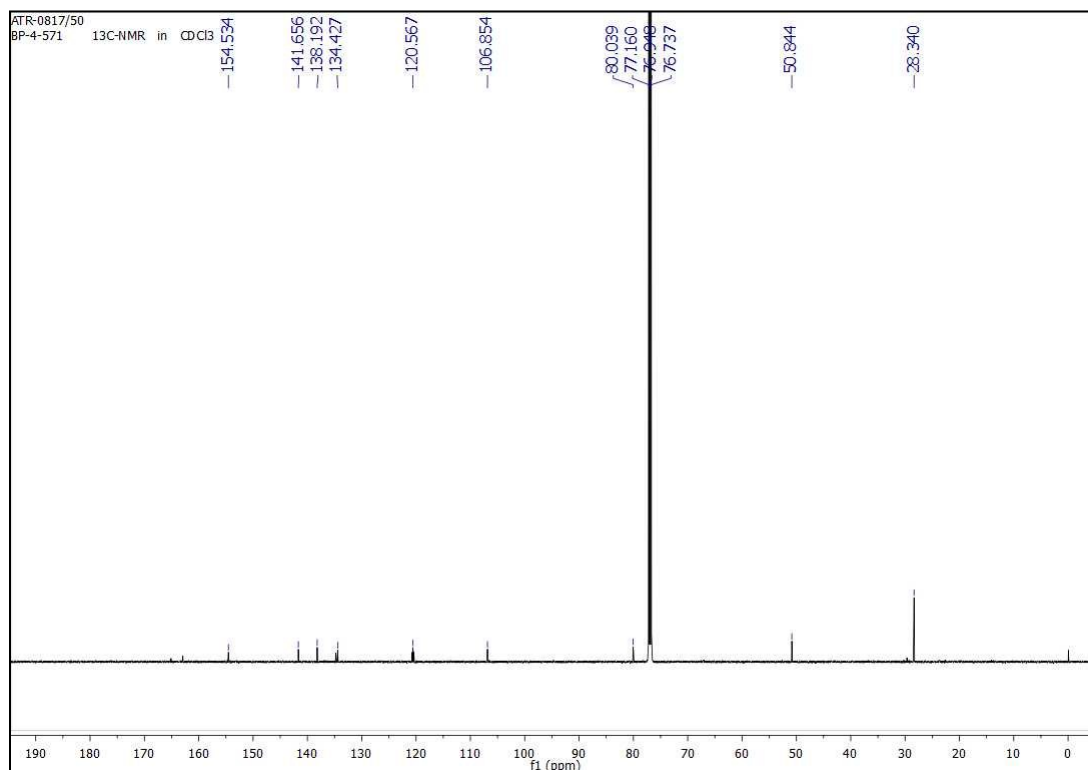

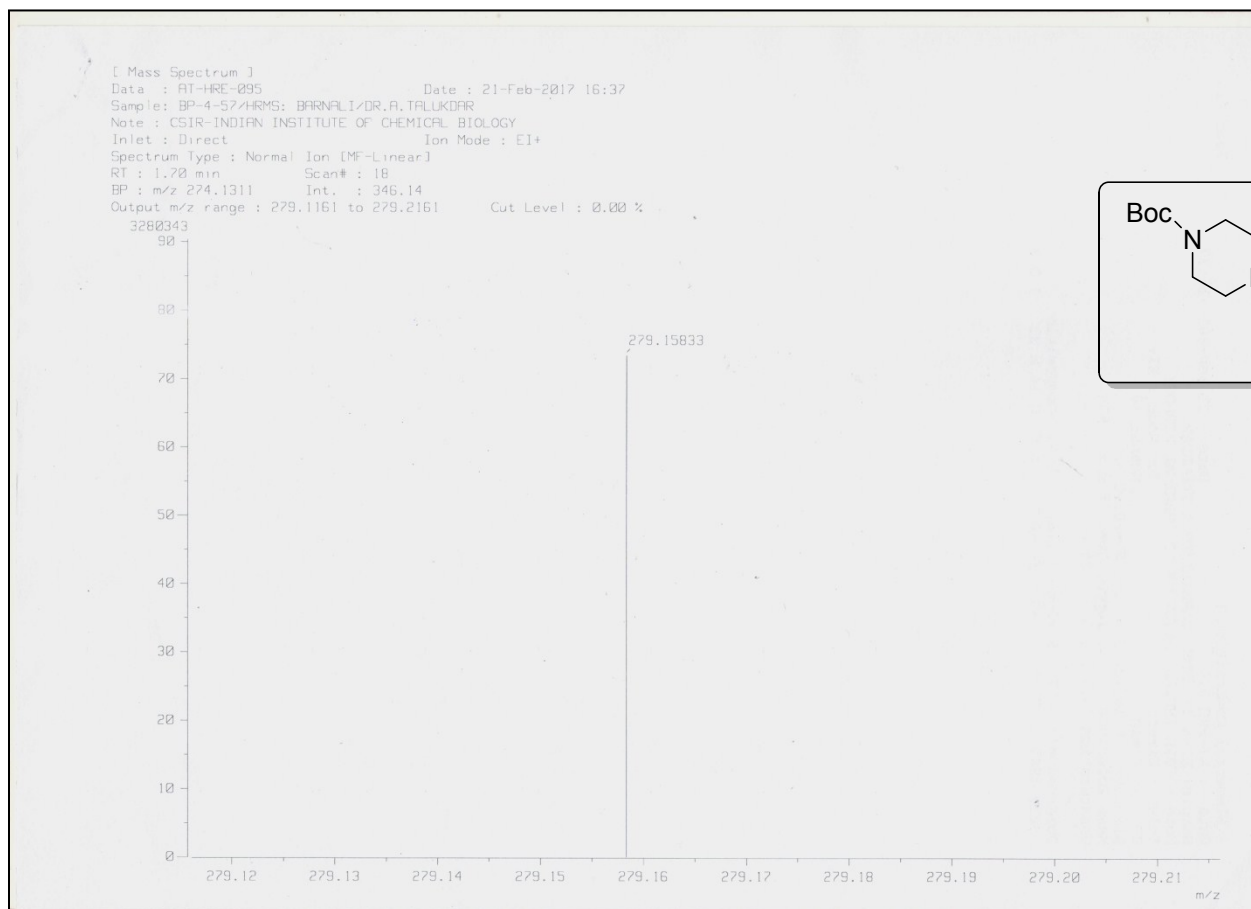

Mass Spectrum of **13**.

**$^1\text{H}$ ,  $^{13}\text{C}$  NMR and Mass spectra of Compound 14:**

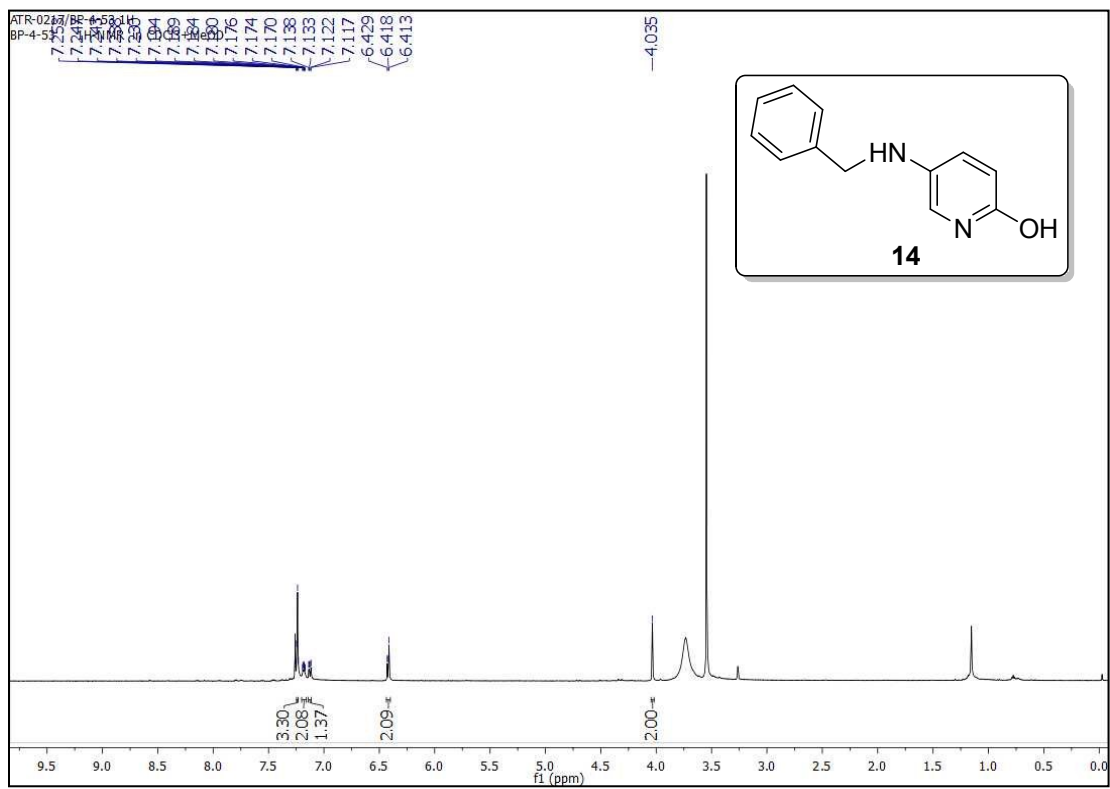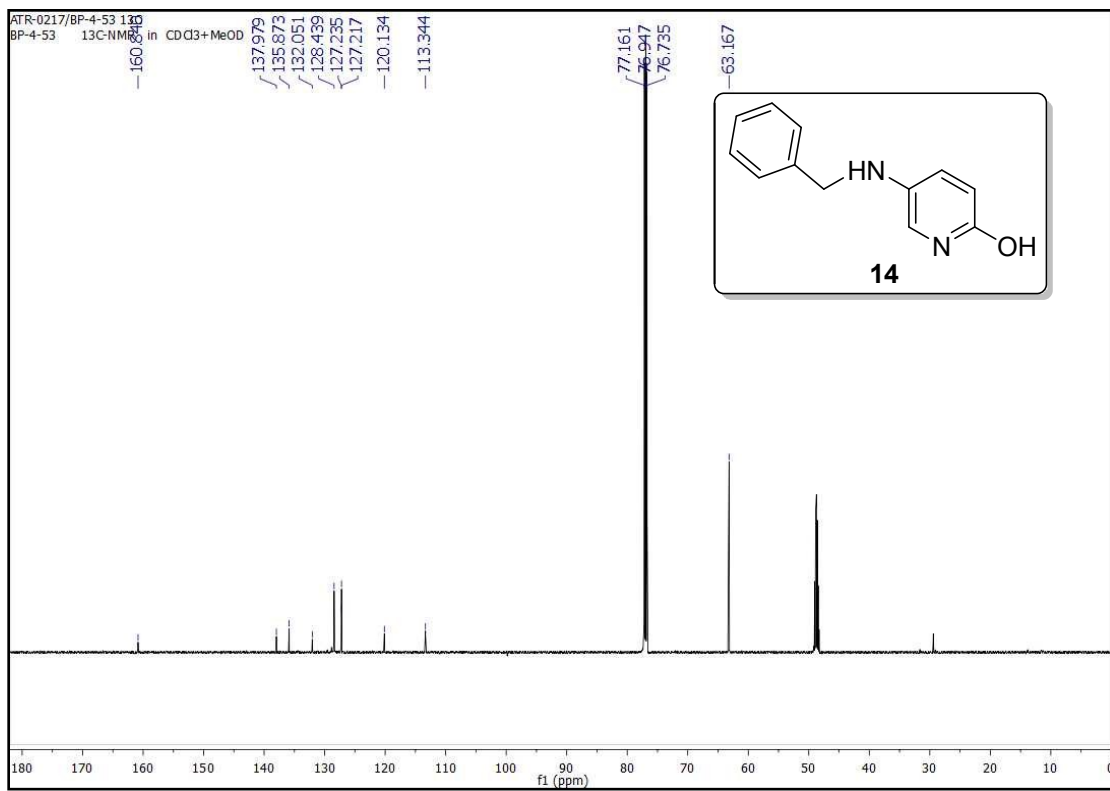

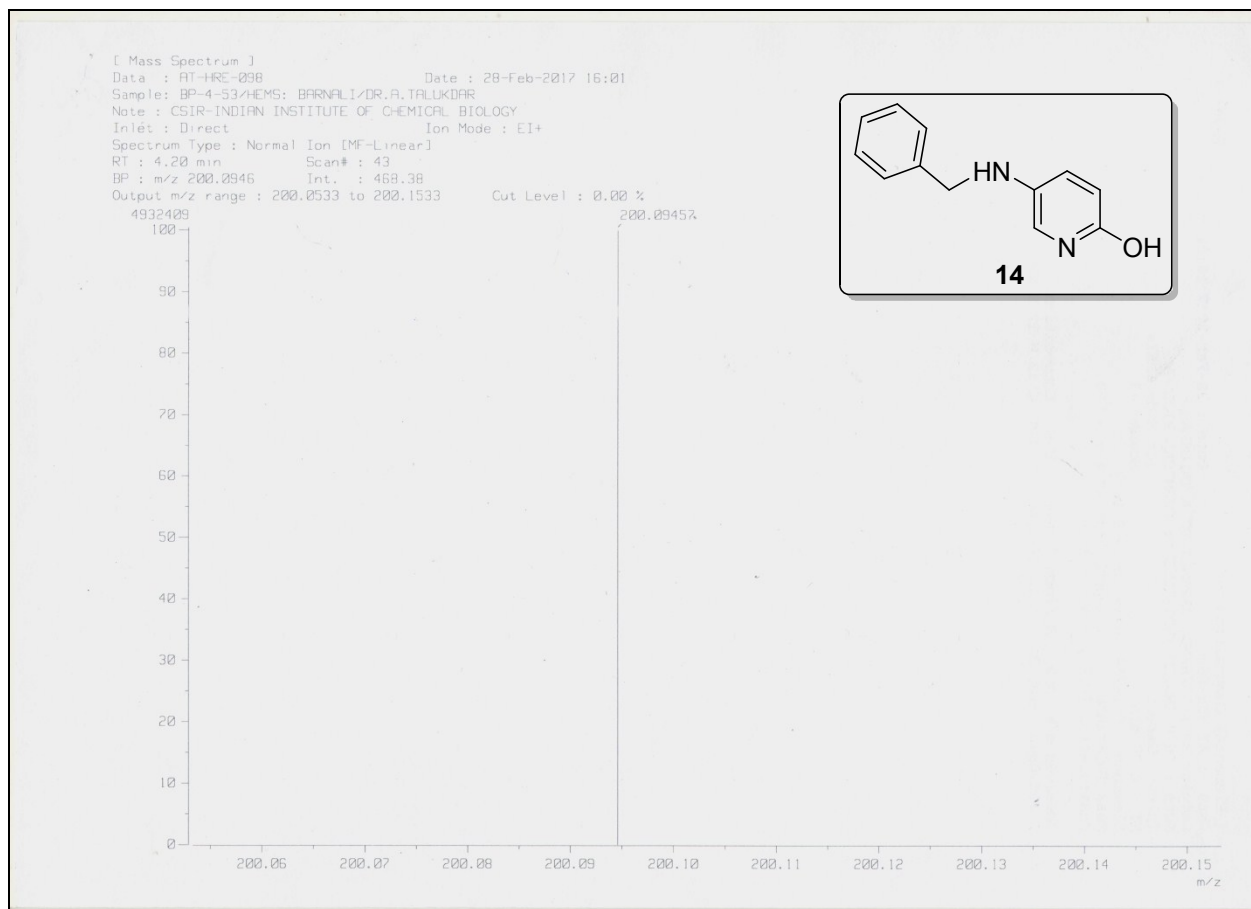

Mass Spectrum of **14**.

**$^1\text{H}$ ,  $^{13}\text{C}$  NMR and Mass spectra of Compound 15:**

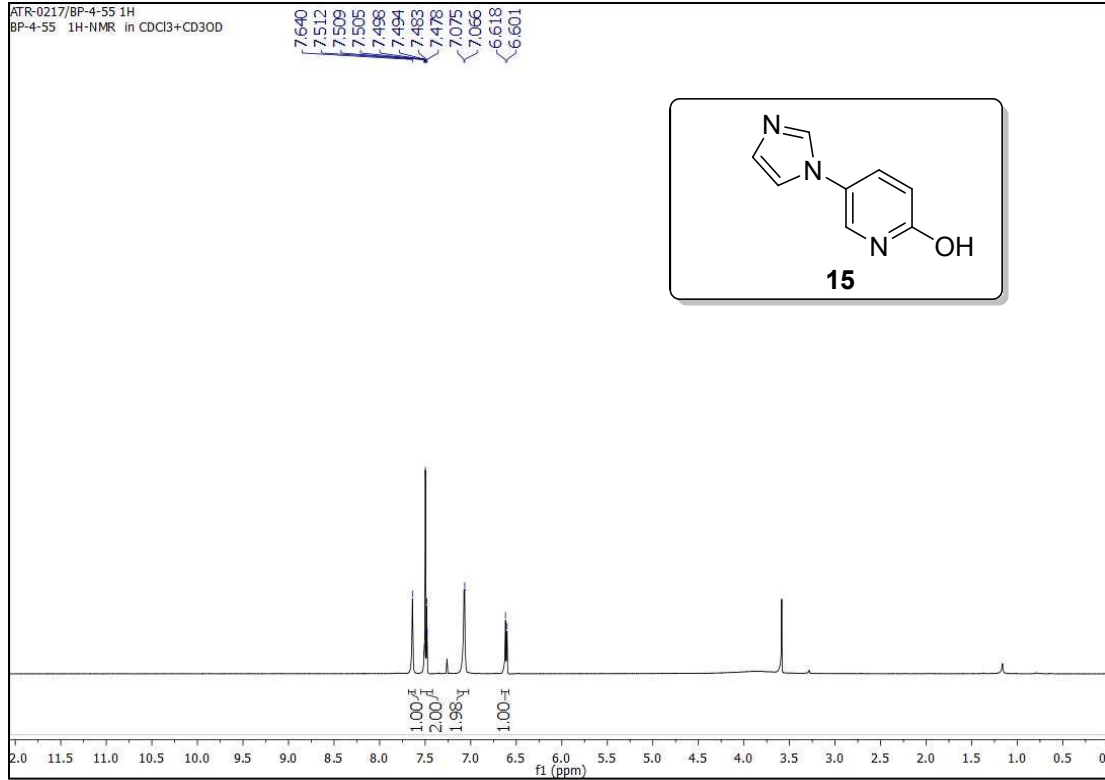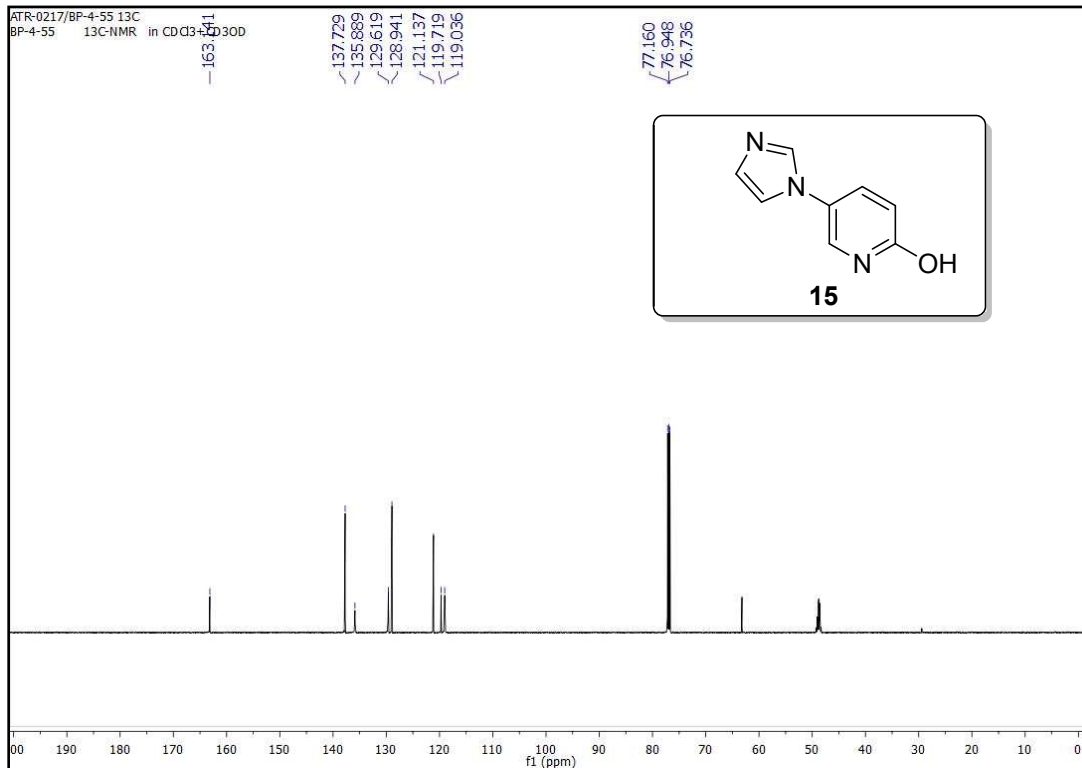

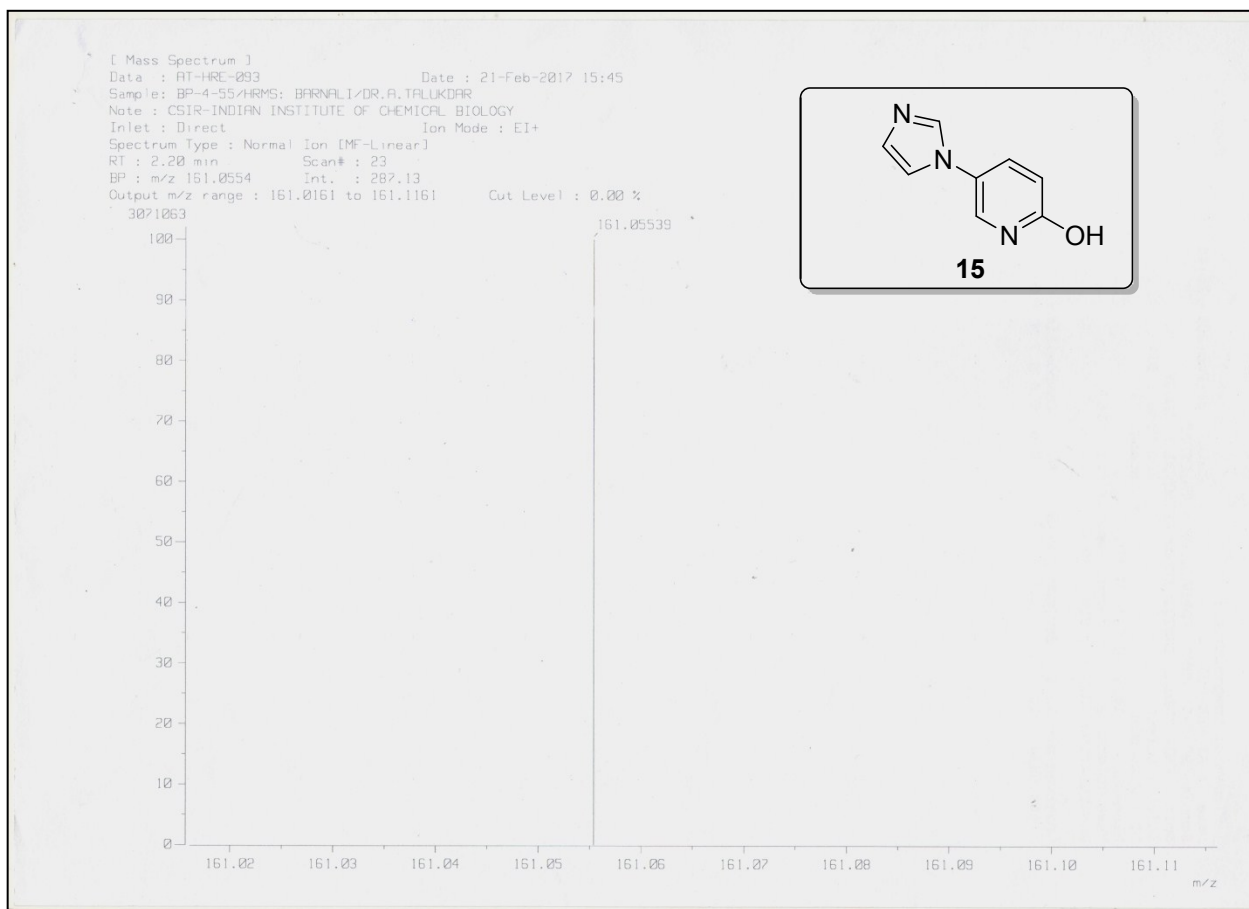

Mass Spectrum of **15**.



**$^1\text{H}$ ,  $^{13}\text{C}$  NMR and Mass spectra of Compound 16:**

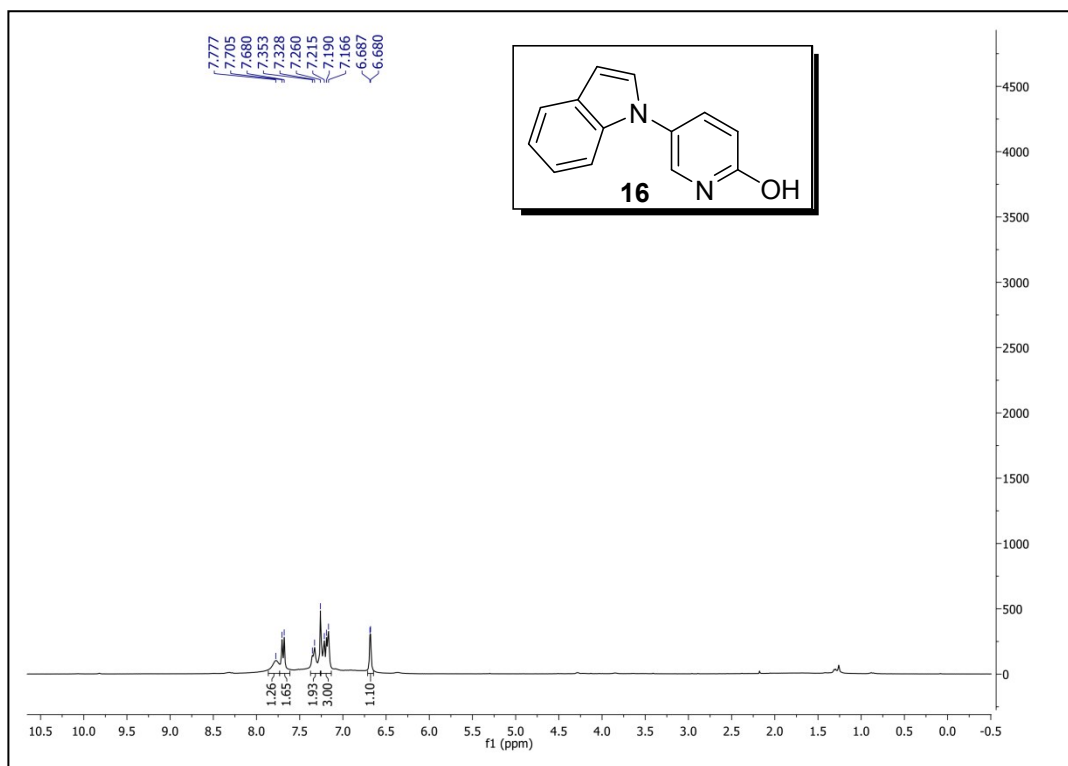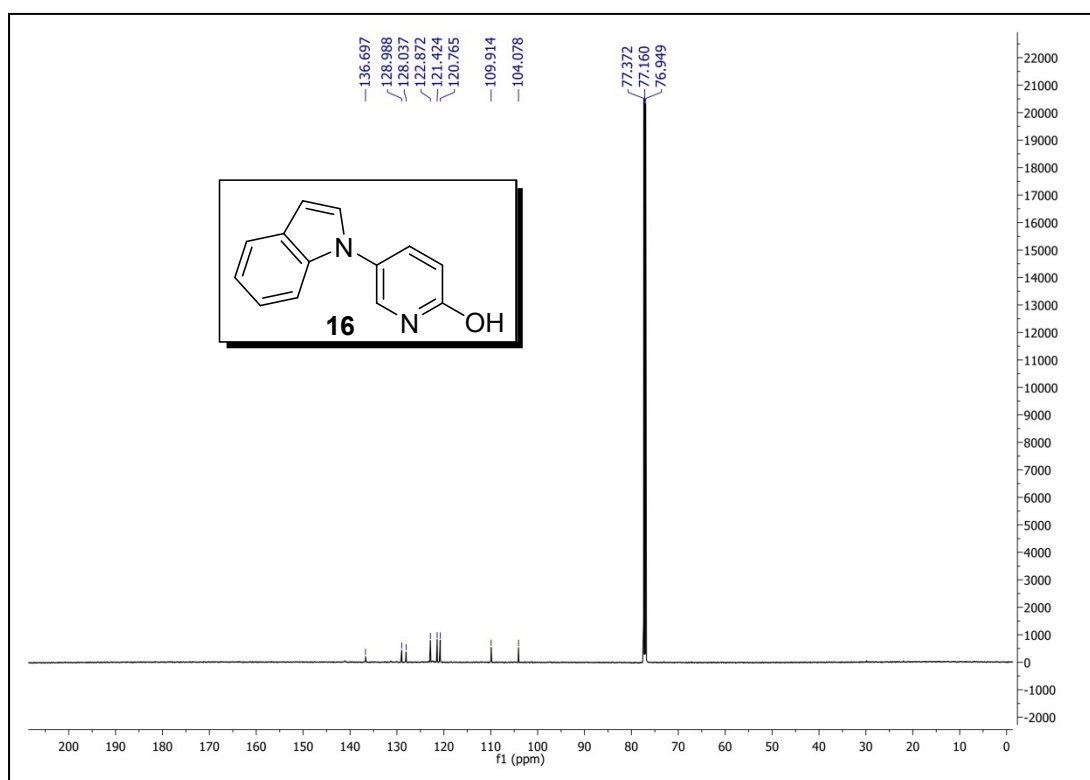

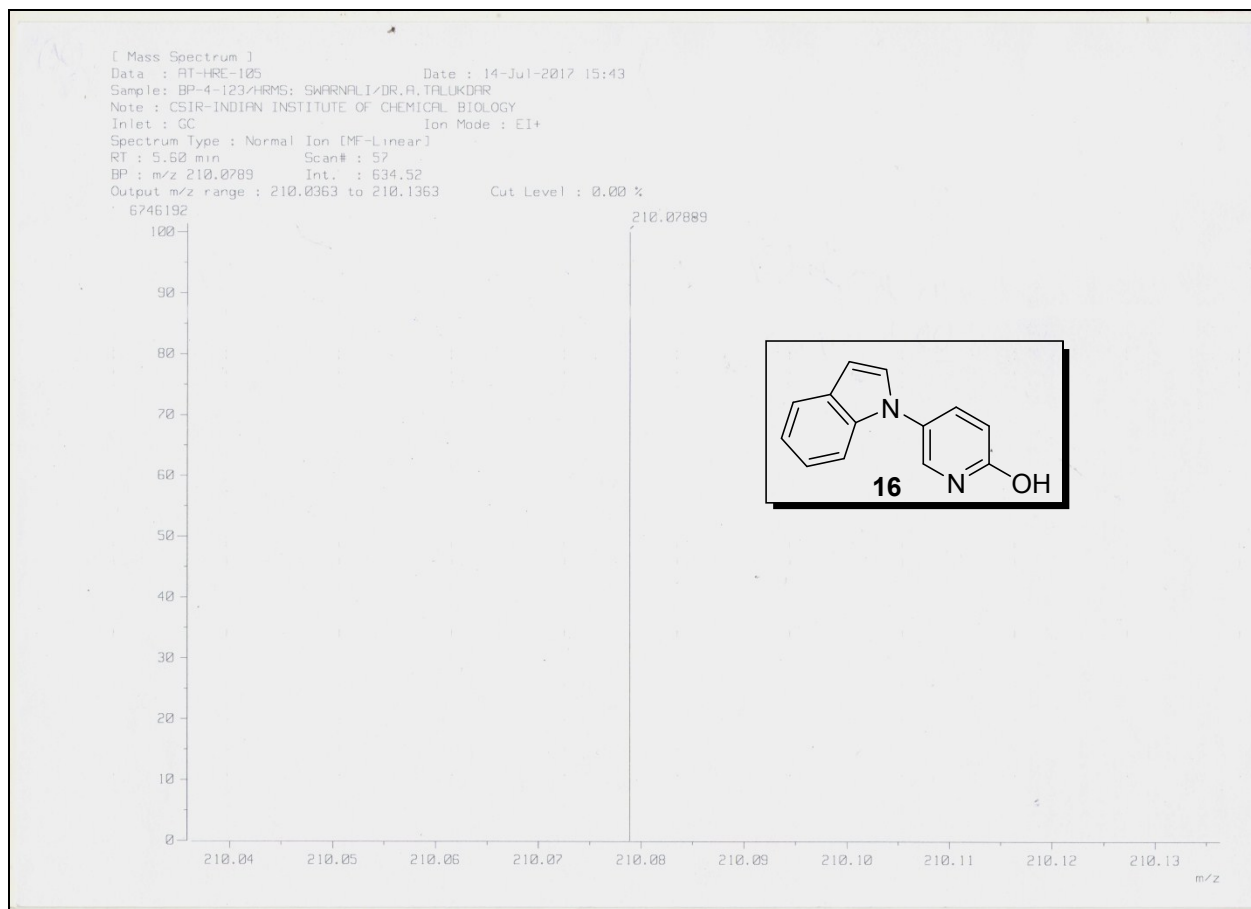

Mass Spectrum of **16**.

**$^1\text{H}$ ,  $^{13}\text{C}$  NMR and Mass spectra of Compound 17:**

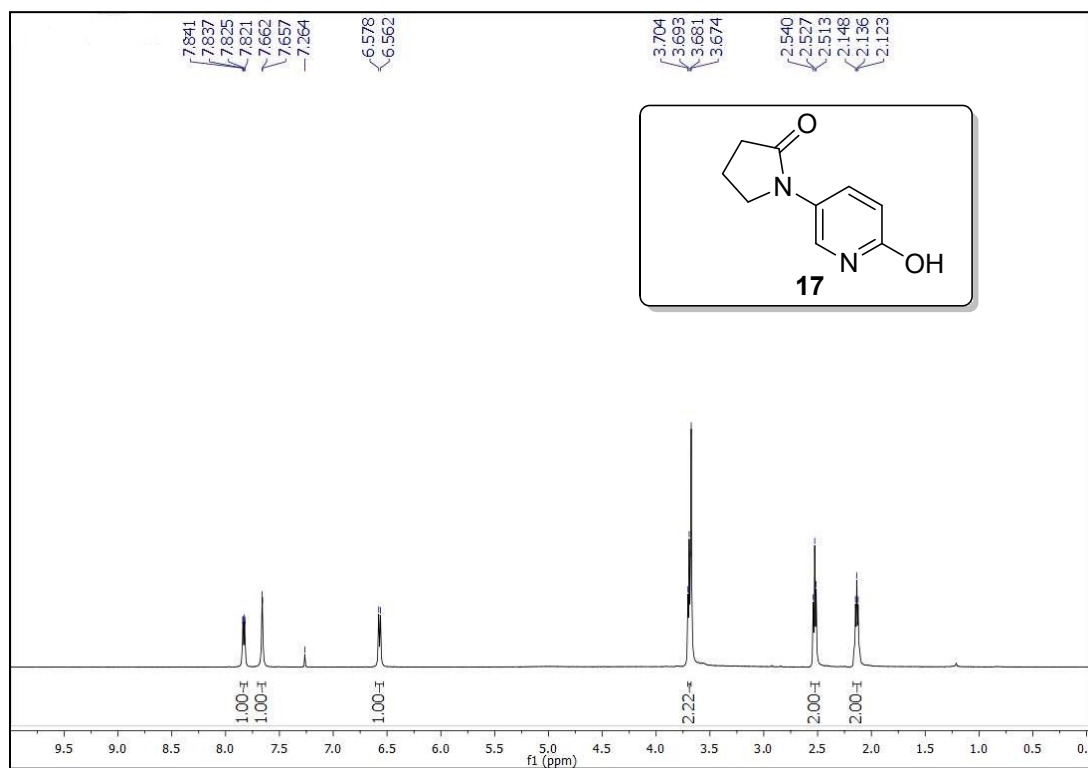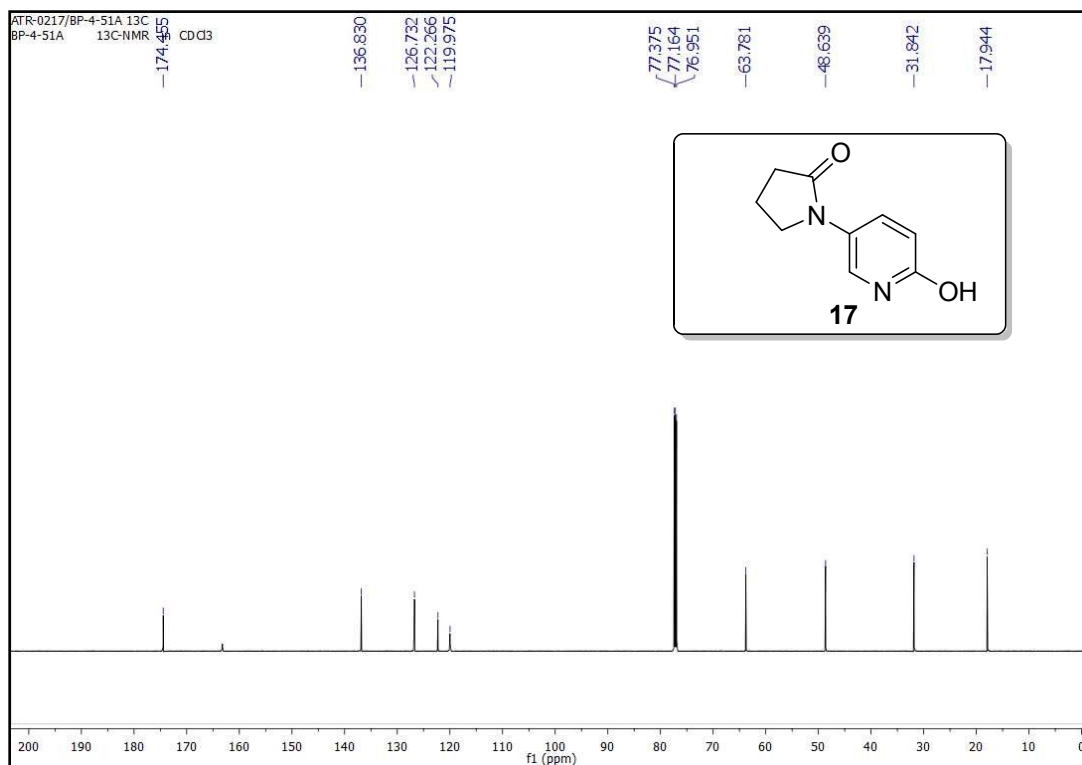

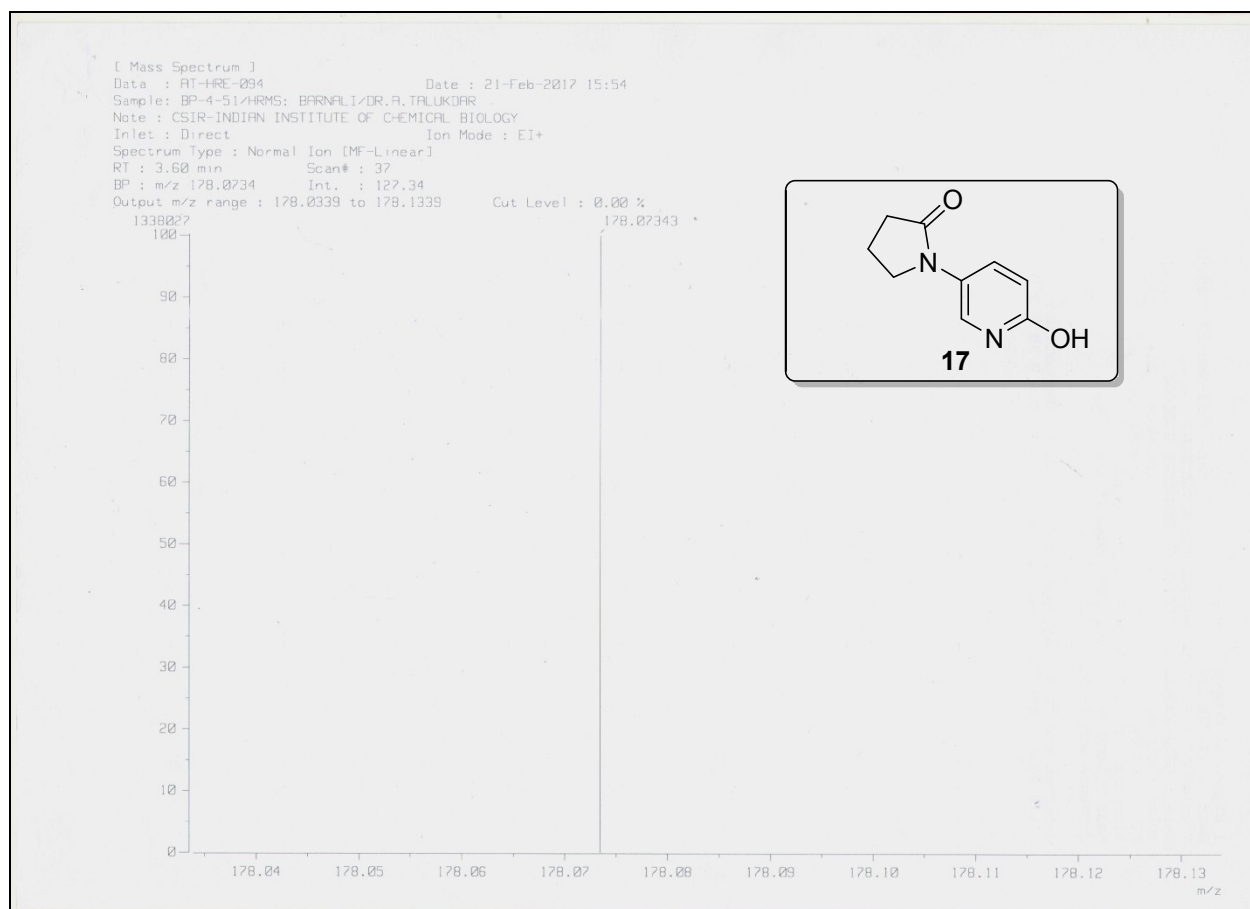

Mass Spectrum of **17**.

**$^1\text{H}$ ,  $^{13}\text{C}$  NMR and Mass spectra of compound 18:**

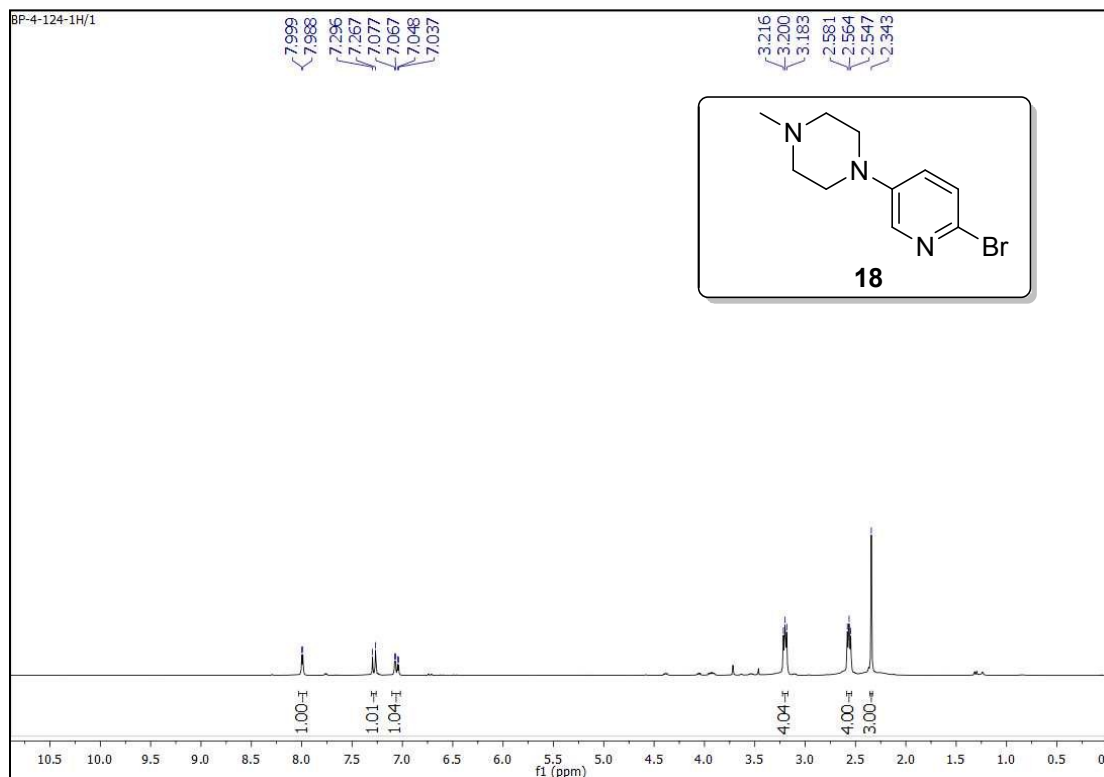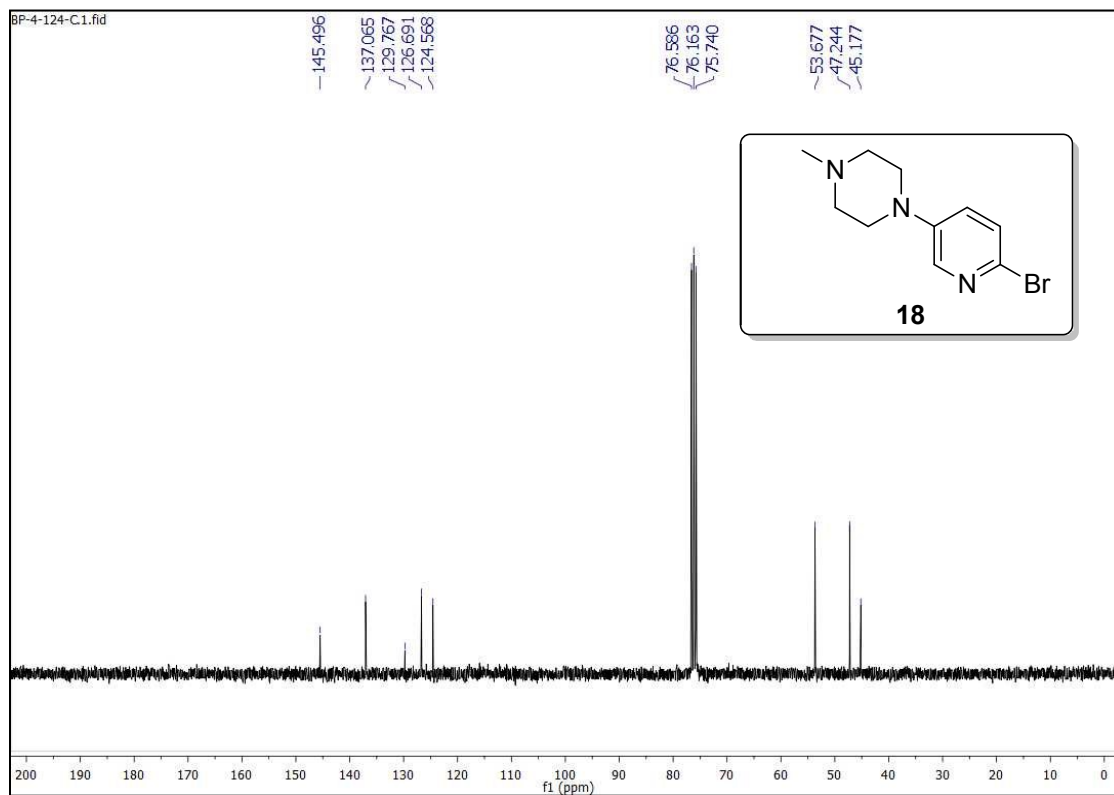

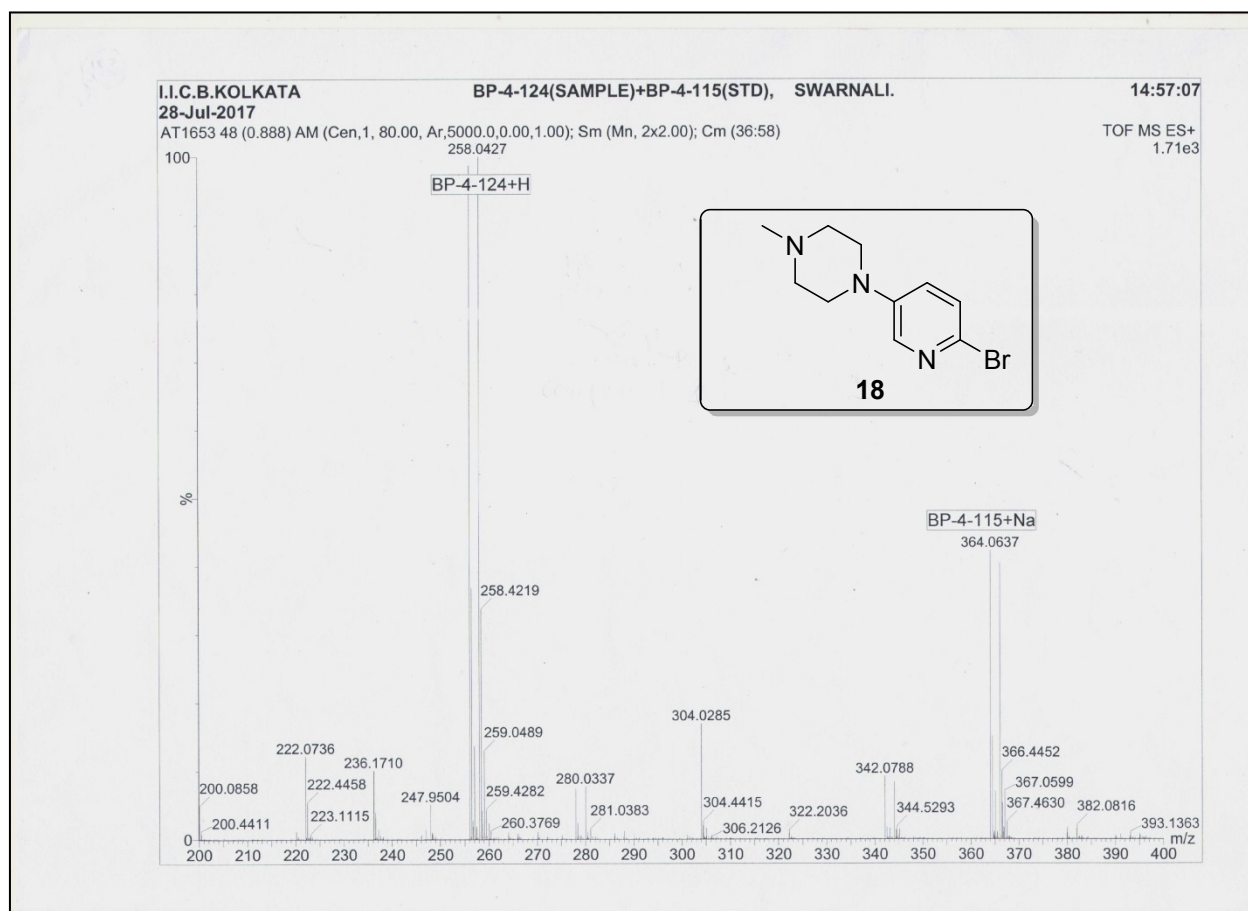

258.0427 is the  $[M+H]^+$  peak of **18**. 364.0637 is the  $[M+Na]^+$  peak of standard.

**<sup>1</sup>H, <sup>13</sup>C NMR and Mass spectra of Compound 19:**

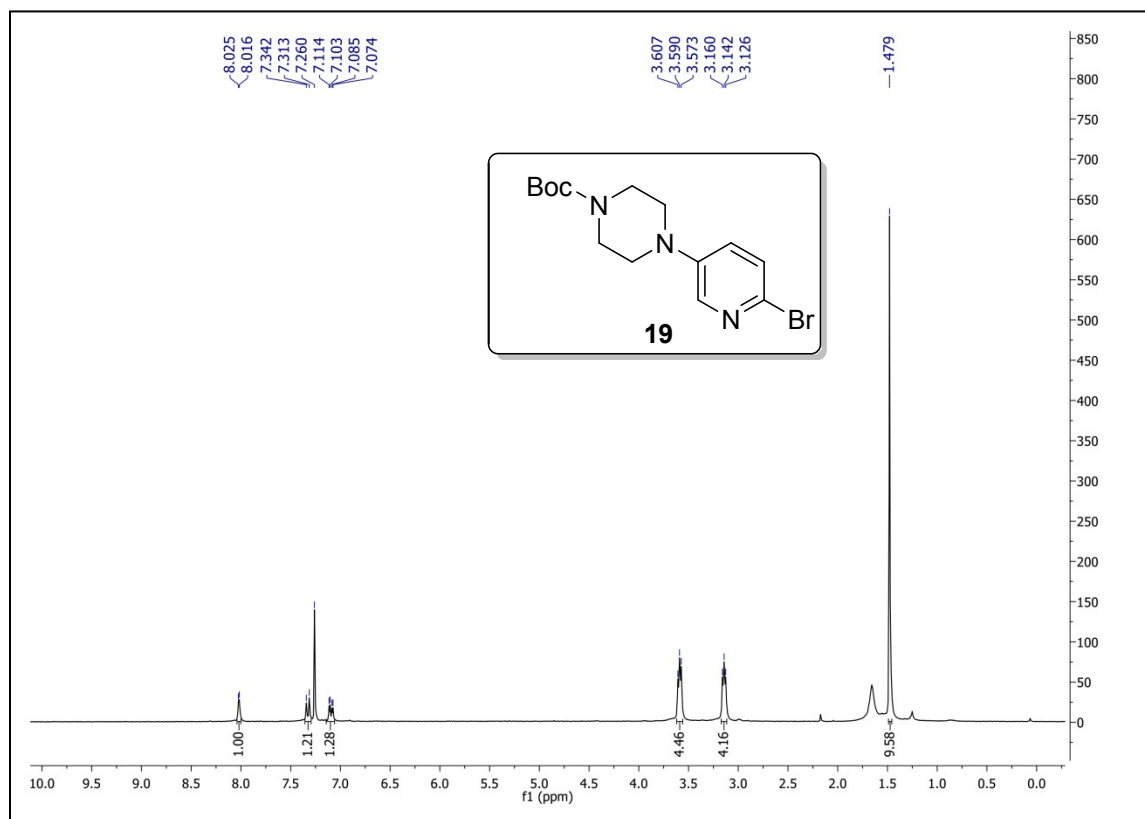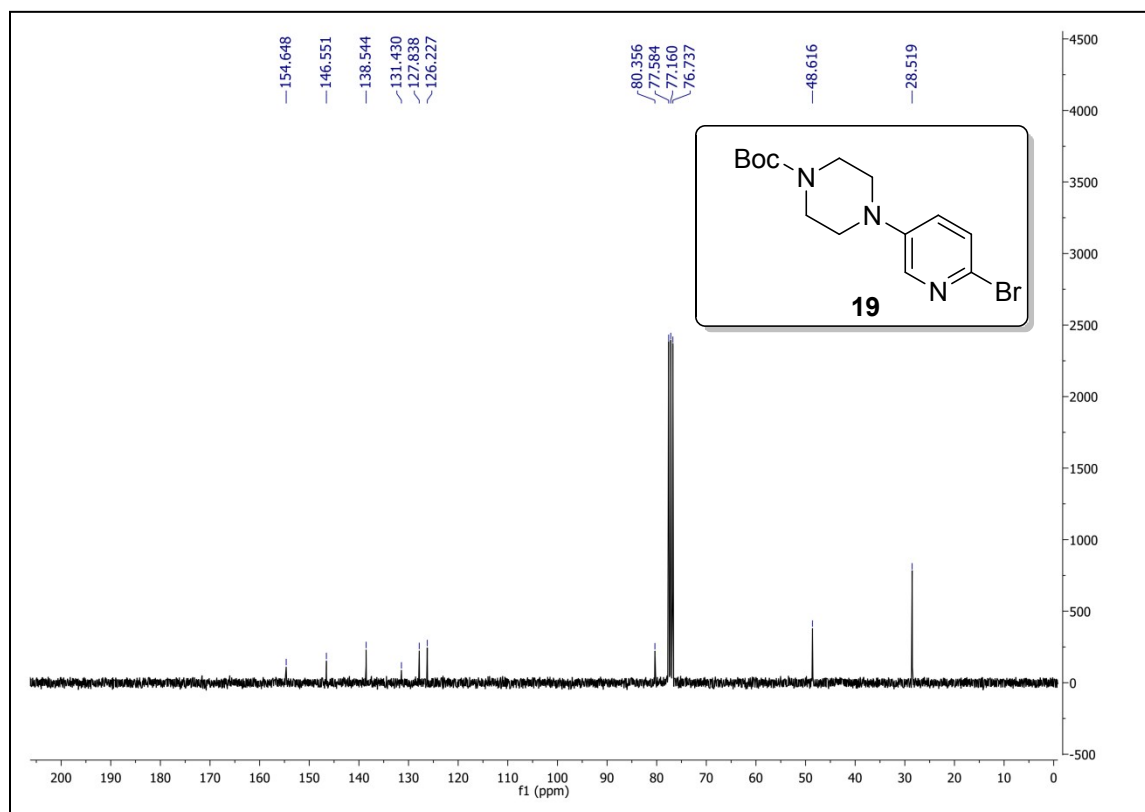

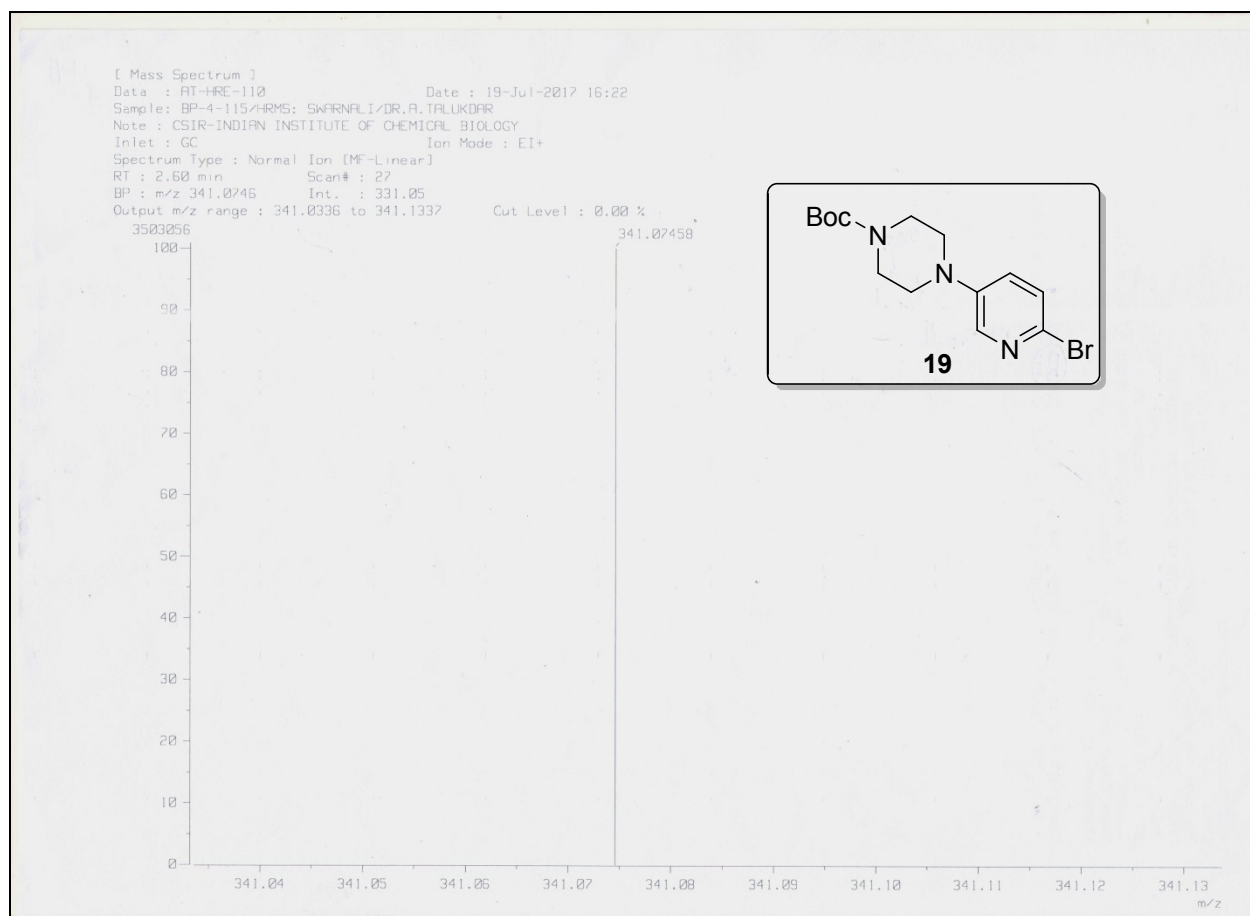

Mass Spectrum of **19**.



**$^1\text{H}$ ,  $^{13}\text{C}$  NMR and Mass spectra of Compound 20:**

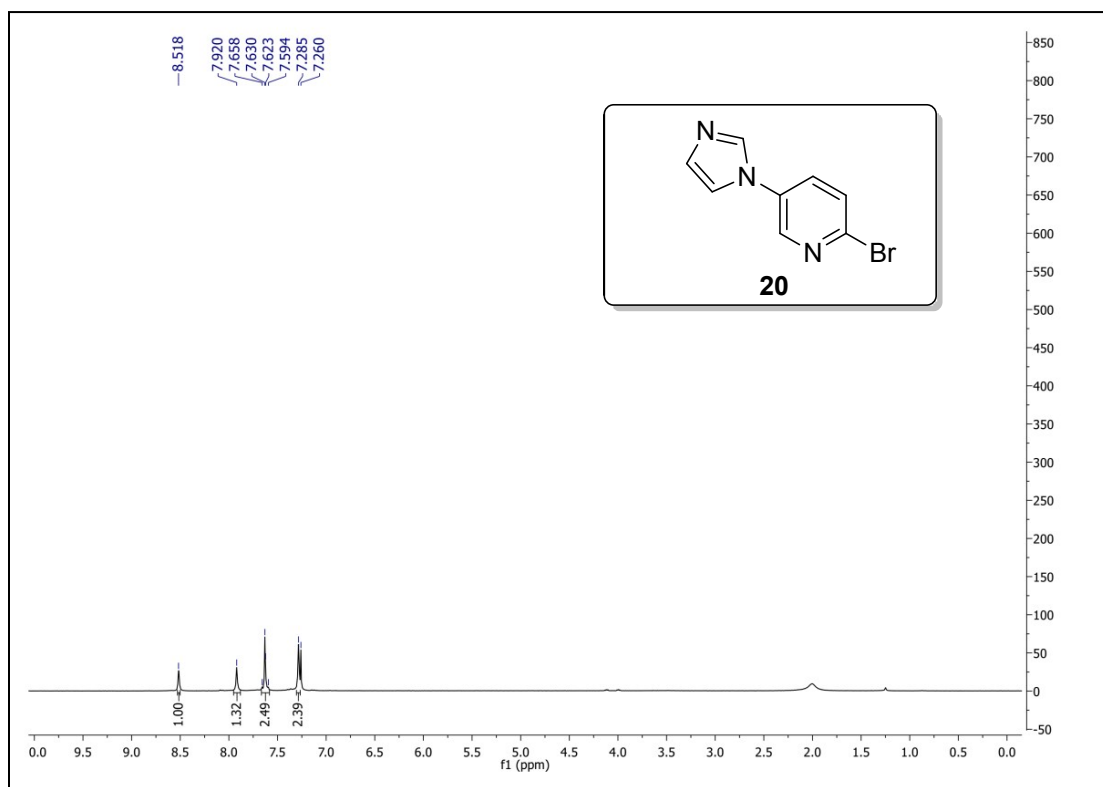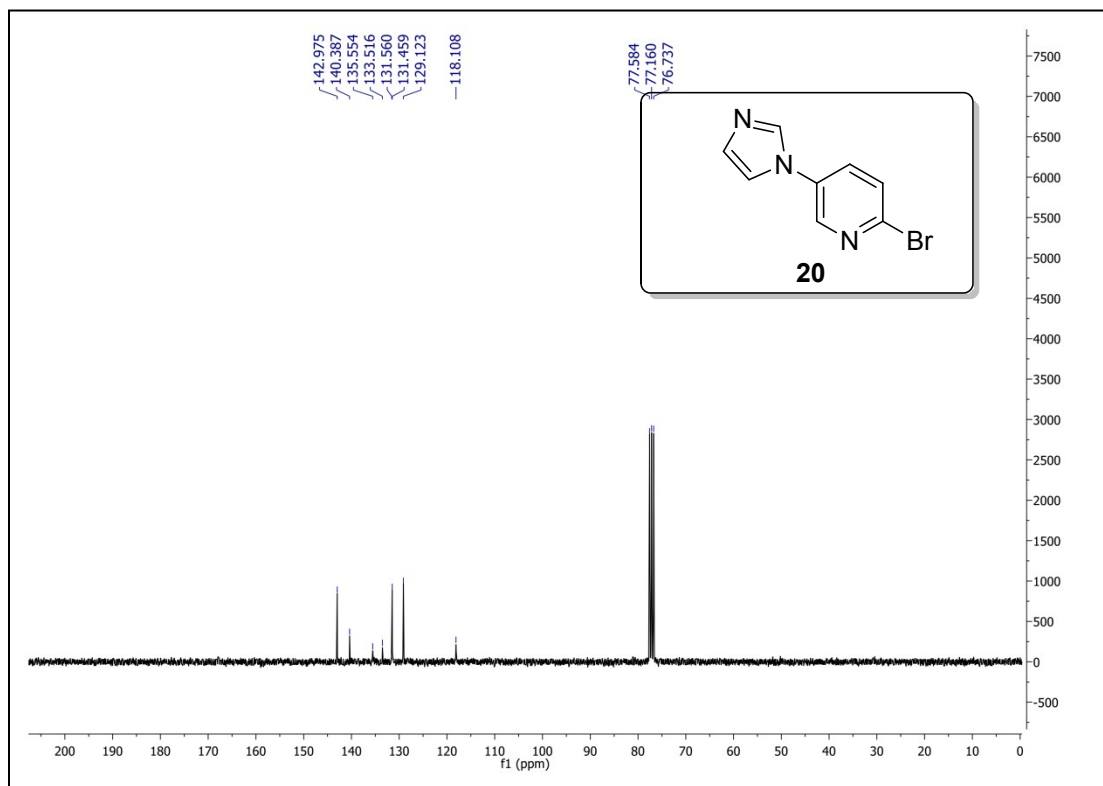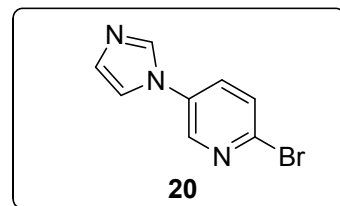

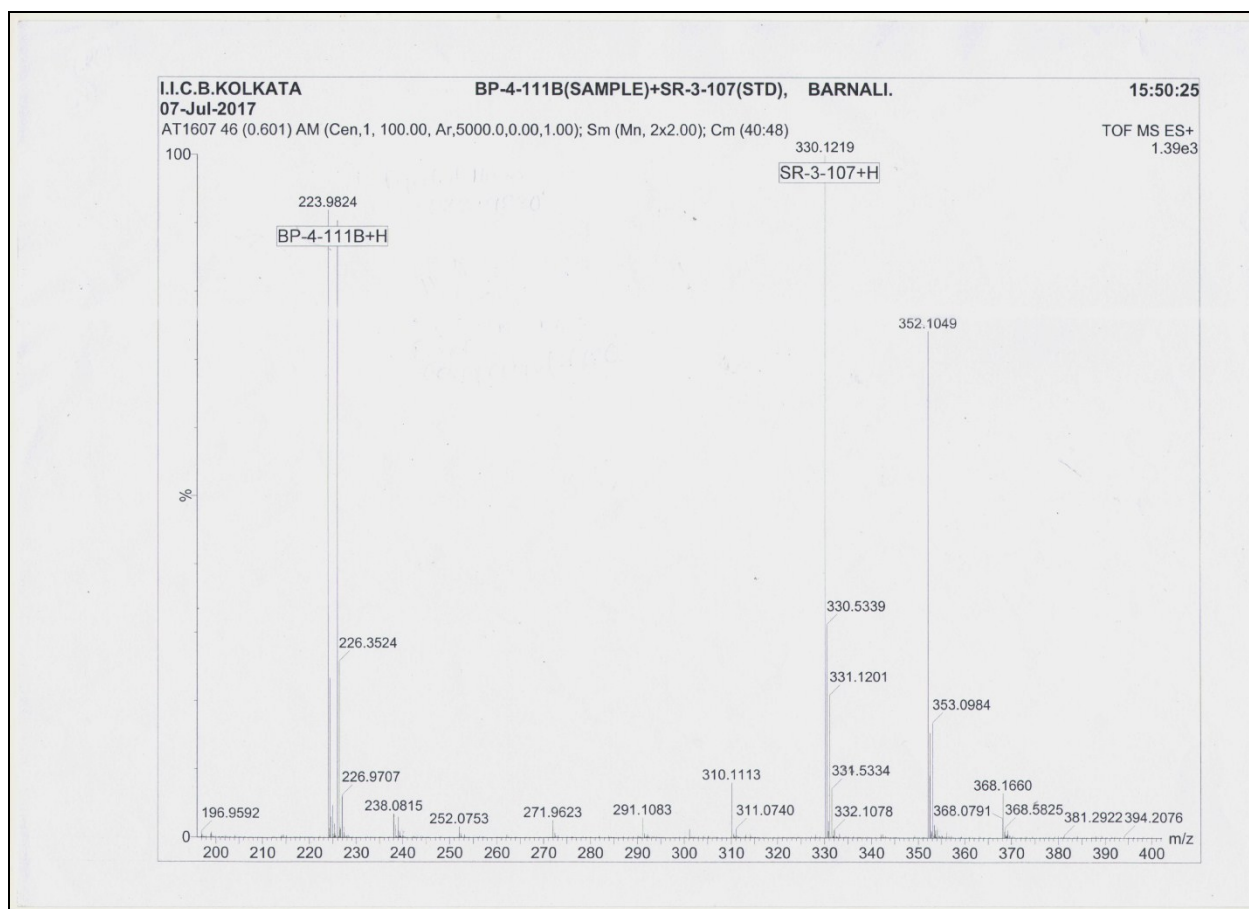

223.9824 is the  $[M+H]^+$  peak of **20**. 330.1219 is the  $[M+H]^+$  and 352.1049 is  $[M+Na]^+$  peak of standard.

**$^1\text{H}$ ,  $^{13}\text{C}$  NMR and Mass spectra of Compound 21:**

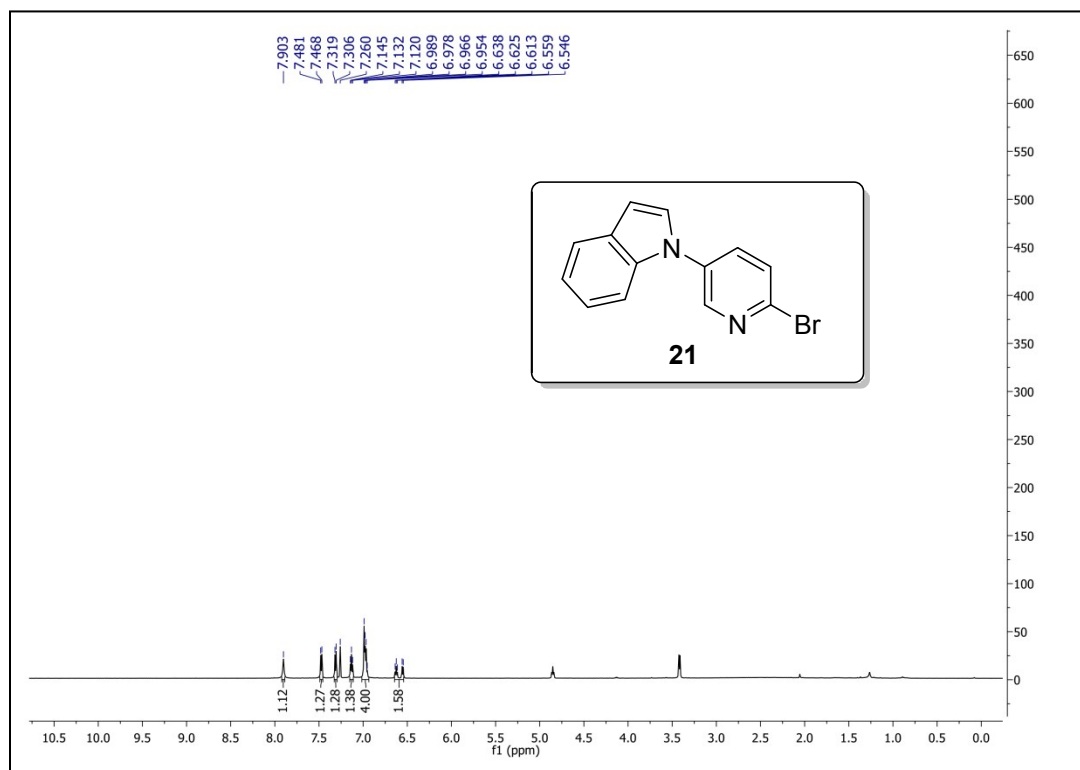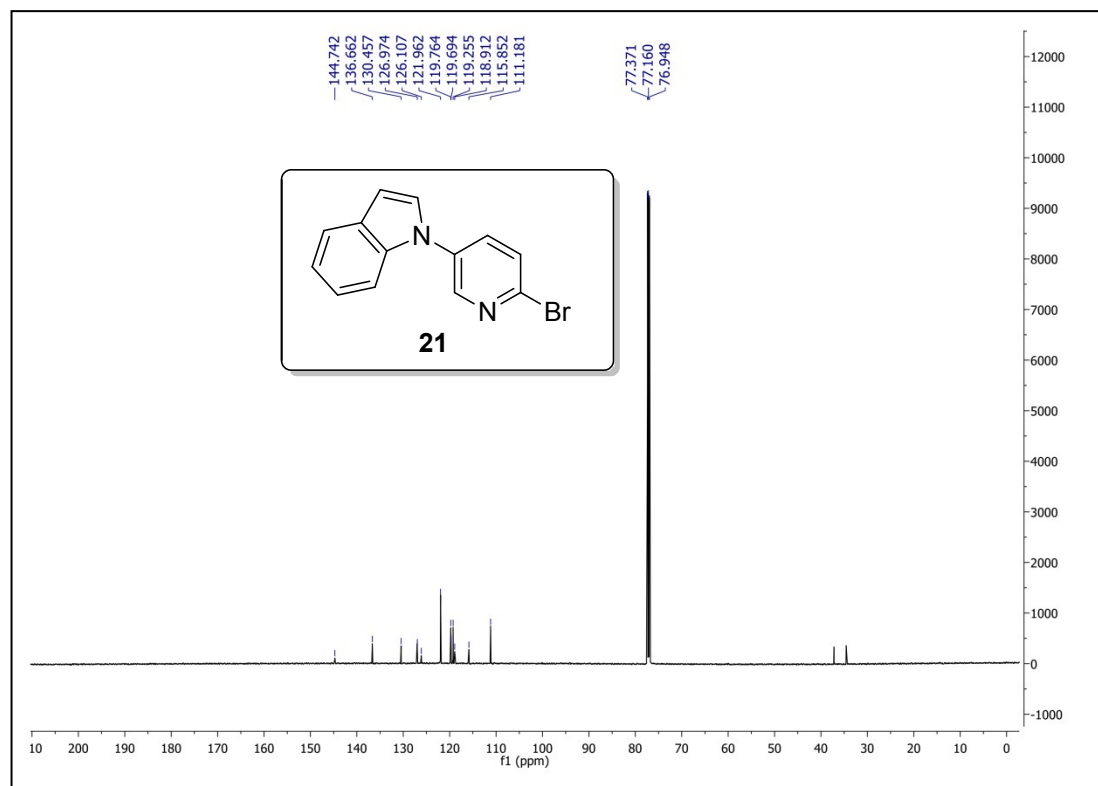

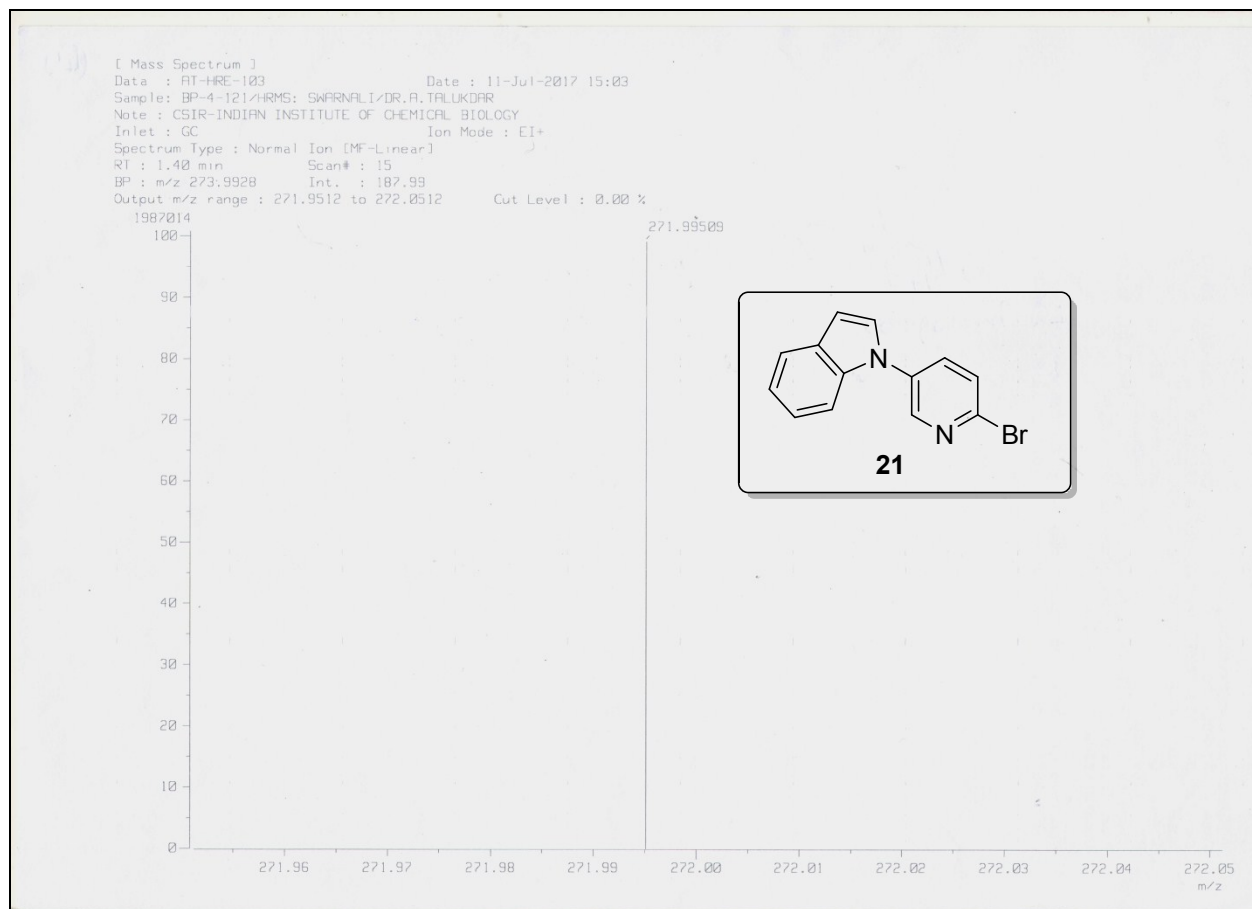

Mass Spectrum of **21**.

**<sup>1</sup>H, <sup>13</sup>C NMR and Mass spectra of Compound 22:**

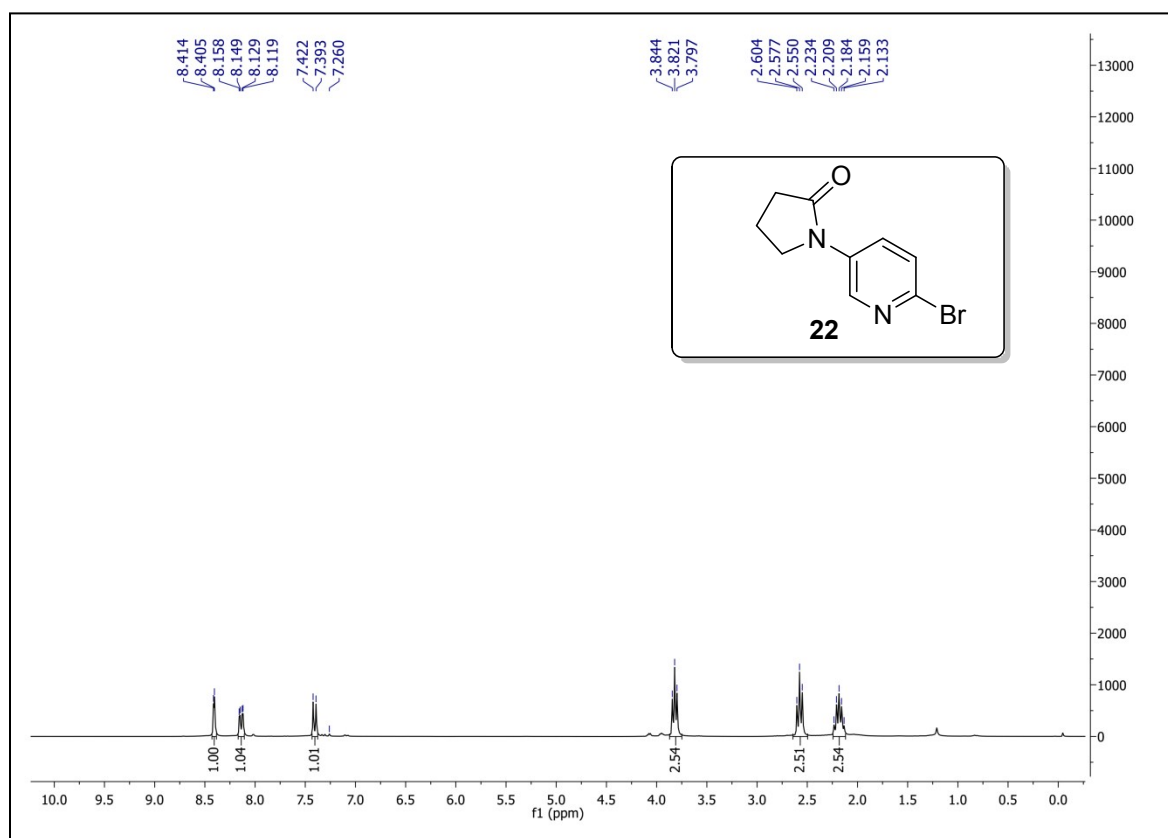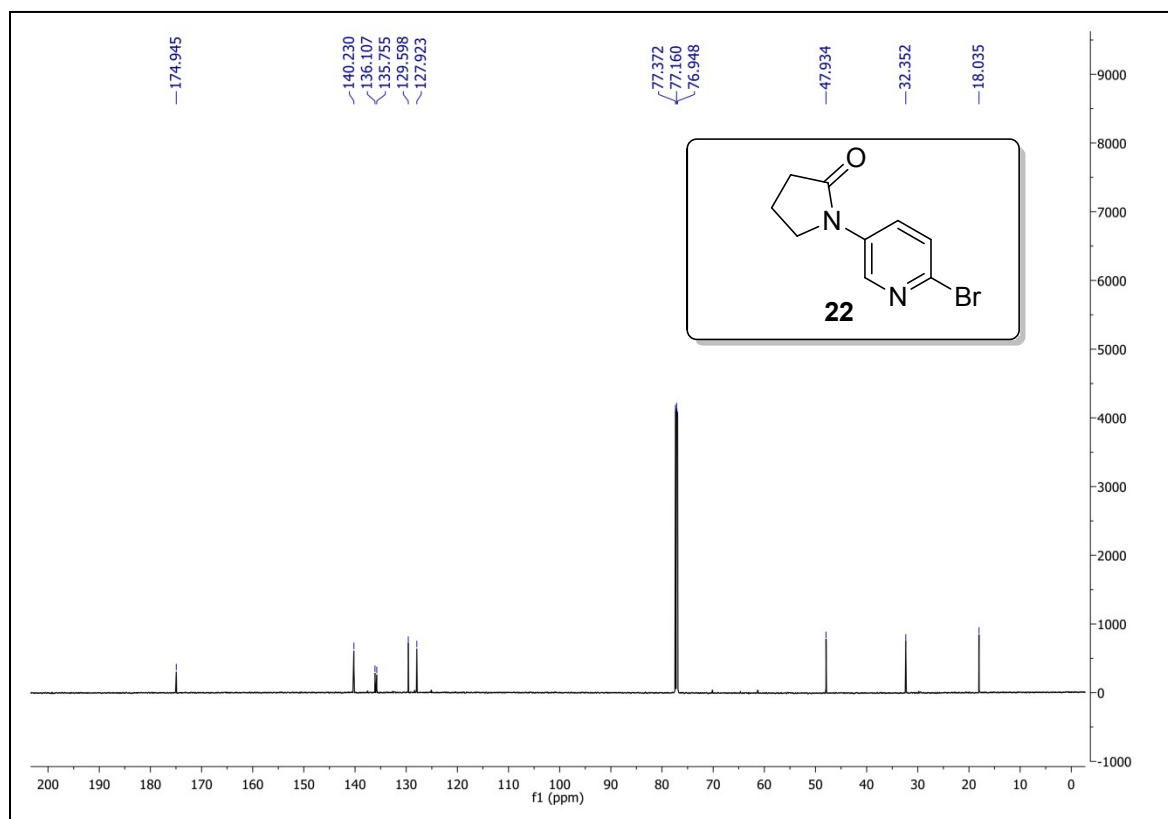

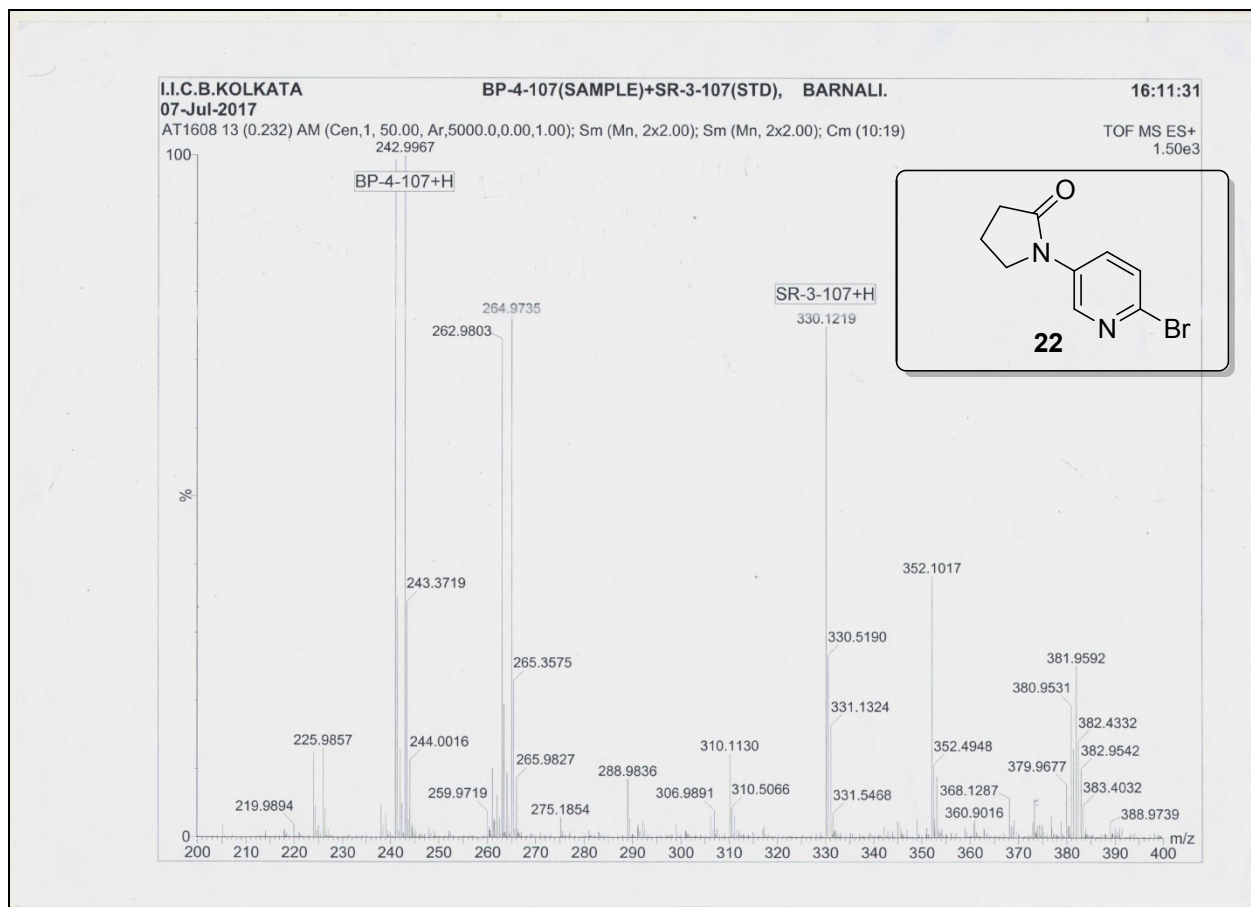

242.9967 is the  $[M+H]^+$  and 264.9735 is  $[M+Na]^+$  peak of **22**. 330.1219 is the  $[M+H]^+$  and 352.1017 is  $[M+Na]^+$  peak of standard.

**$^1H$ ,  $^{13}C$  NMR and Mass spectra of Compound 24:**

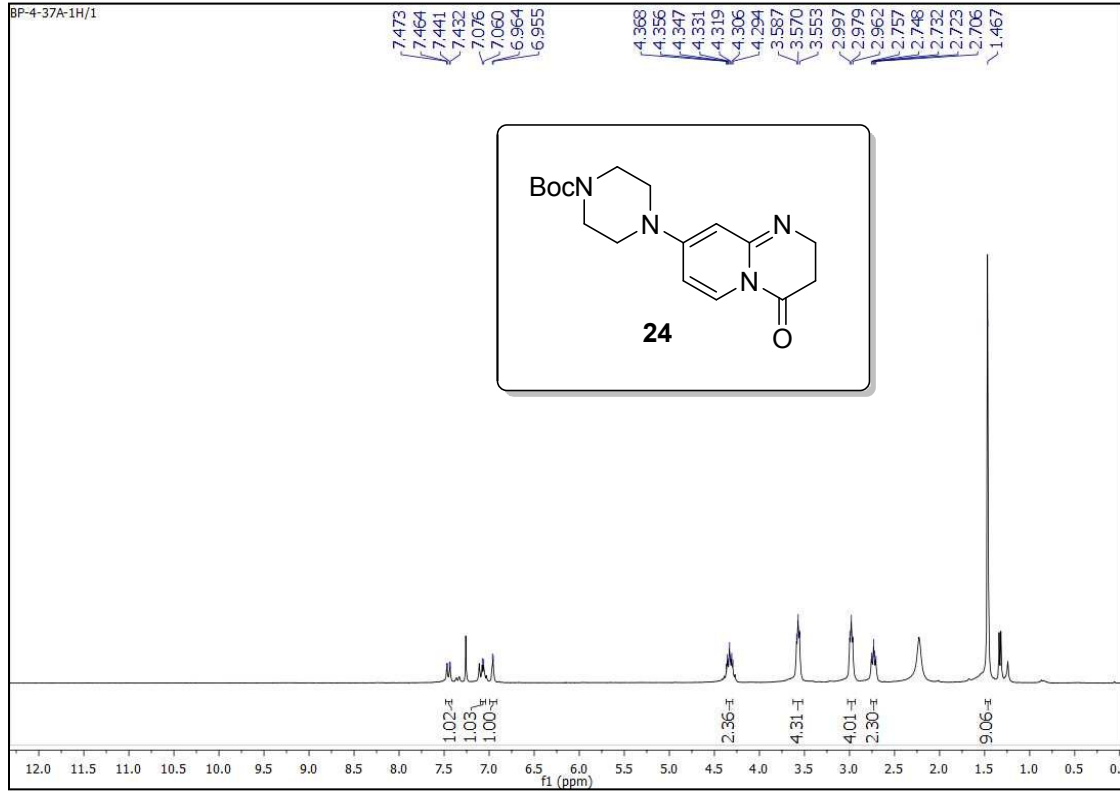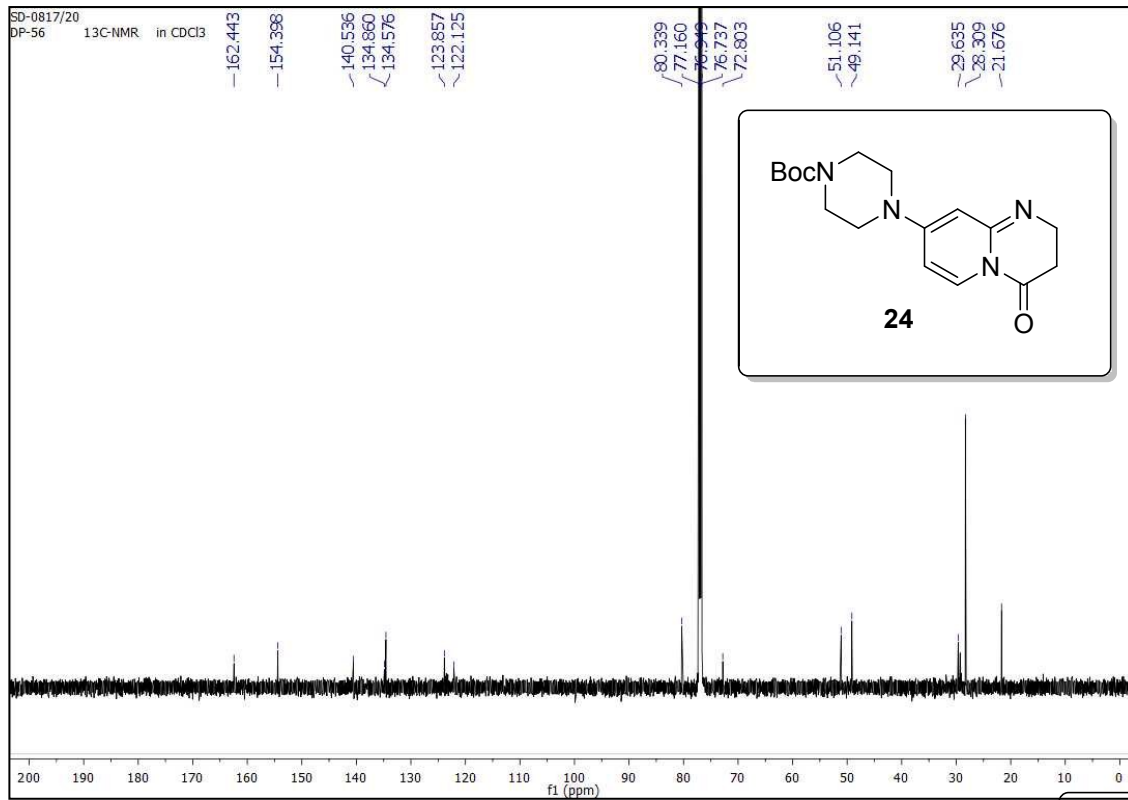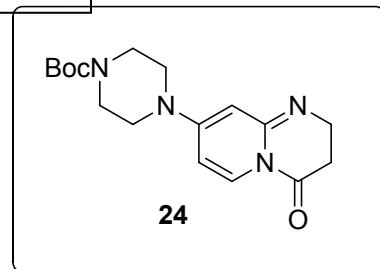

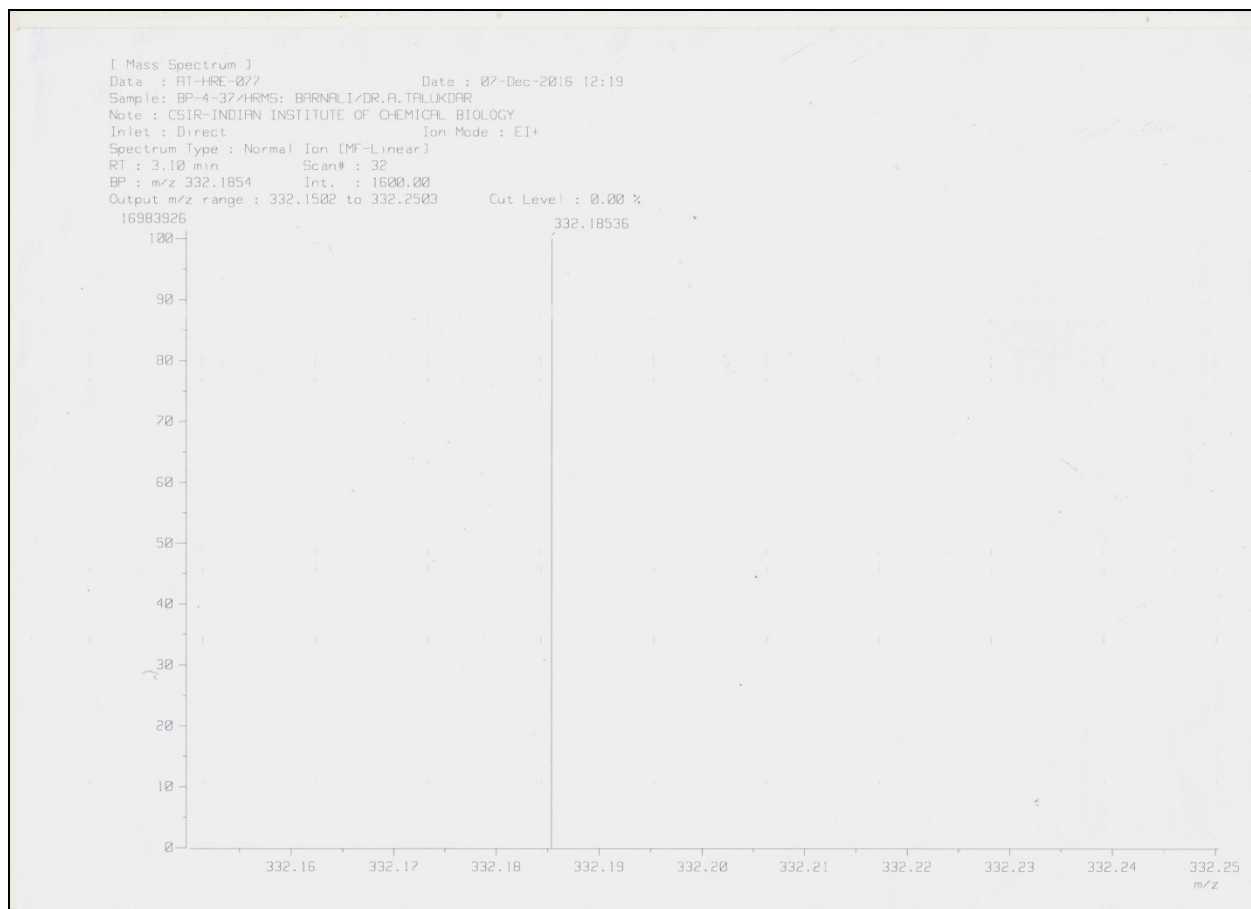

Mass Spectrum of **24**.

**$^1\text{H}$ ,  $^{13}\text{C}$  NMR and Mass spectra of Compound 25:**



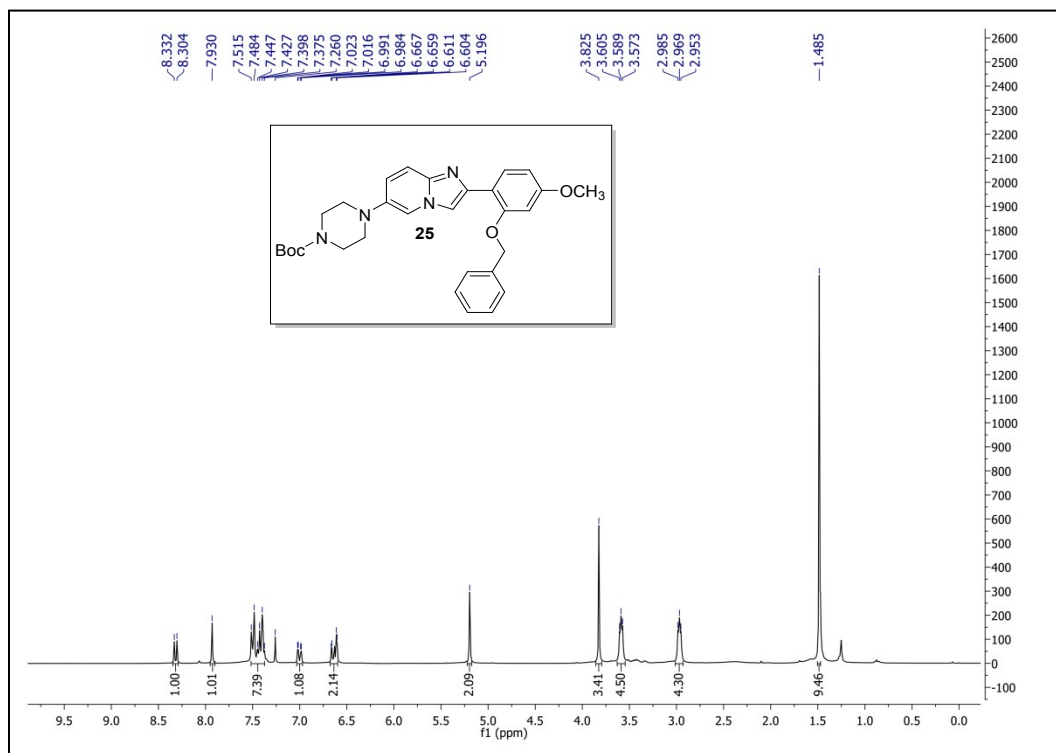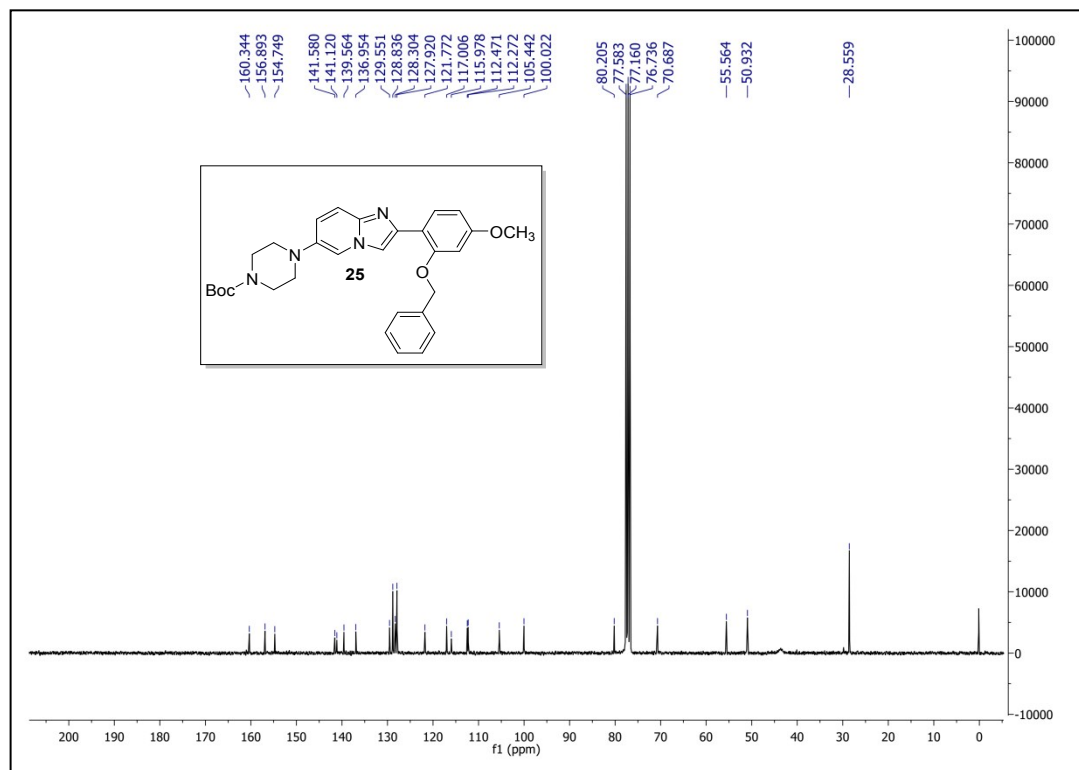

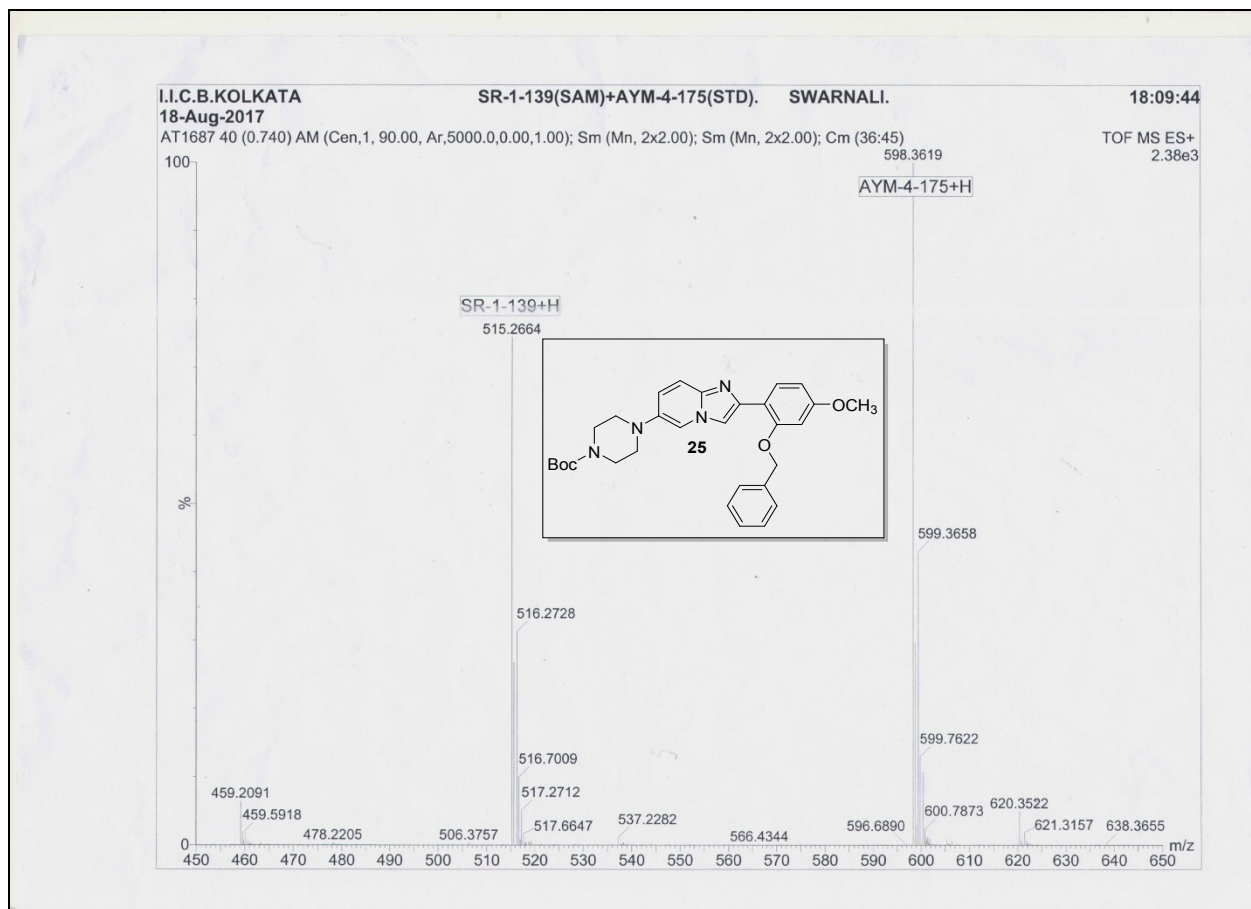

515.2664 is the  $[M+H]^+$  peak of **25**. 598.3619 is the  $[M+H]^+$  peak of standard.
